# Supplementary material for: Repeated pulses of ultrasound maintain sperm motility
Source: Royal Society of Chemistry journal article supplement (doi:10.1039/d4lc00826j), 2024-11-26
Supplement: d4lc00826j1.pdf [file d4lc00826j1.pdf]

## Supplementary Information

### Repeated Pulses of Ultrasound Maintain Sperm Motility

*Ali Vafaie<sup>1</sup>, Sahar Shahali<sup>1</sup>, Mohammad Reza Raveshi<sup>1</sup>, Reza Nosrati<sup>1,\*</sup>, Adrian Neild<sup>1,\*</sup>*

<sup>1</sup> *Department of Mechanical and Aerospace Engineering, Monash University, Clayton, Victoria 3800, Australia*

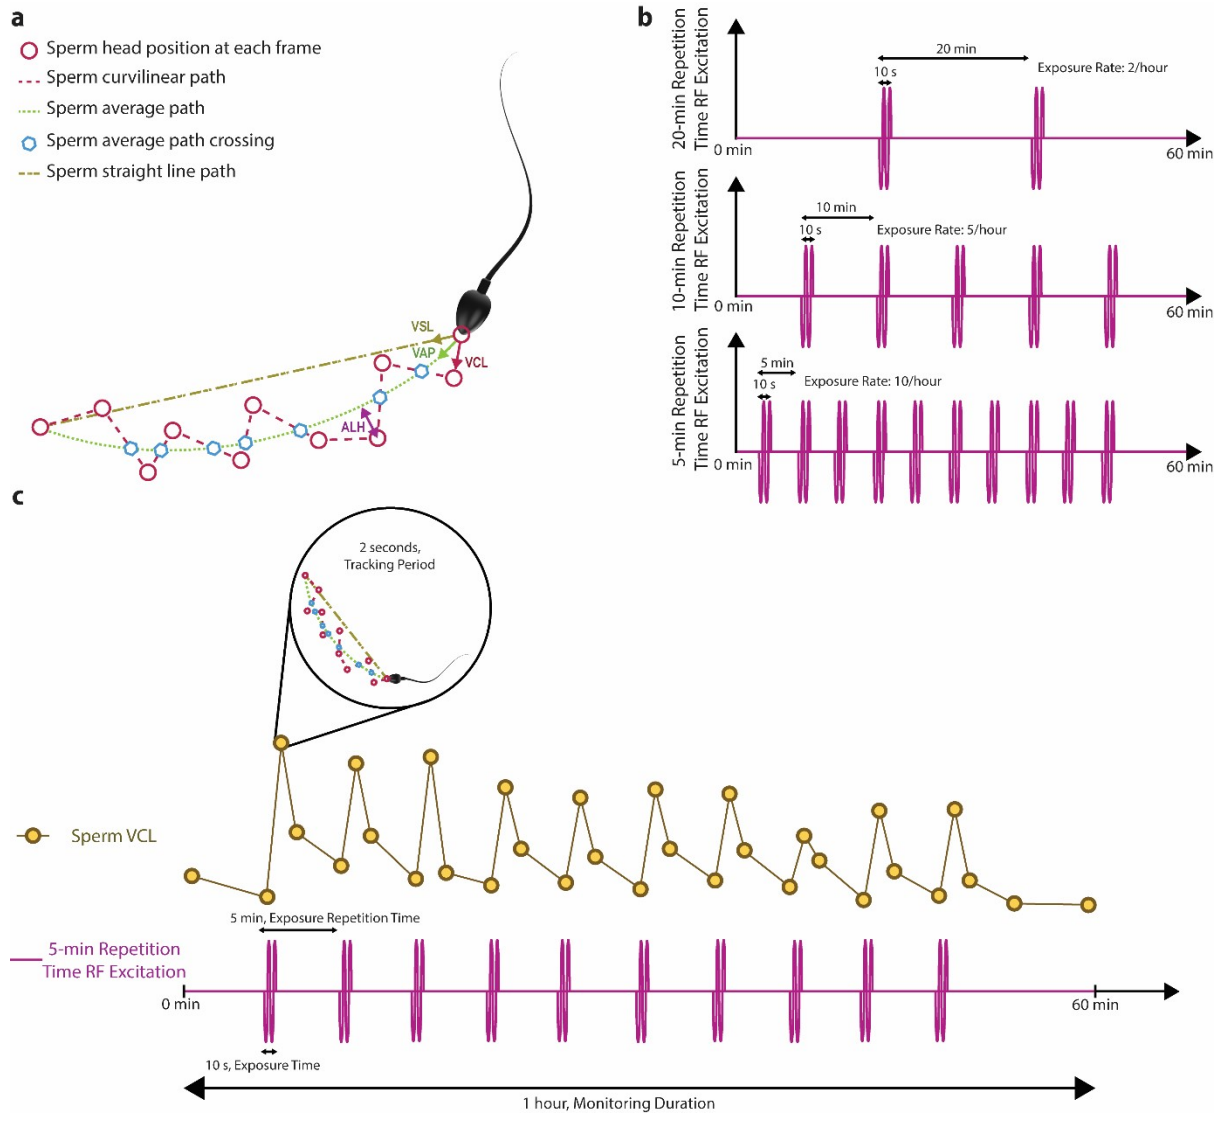

**Figure S1. Schematic representation of sperm motility parameters and various ultrasound excitation setups and parameters used in this study.** (a) Diagram illustrating the trajectory of sperm movement. The red dashed line represents the instantaneous swimming path, while the green dashed line depicts the projected average path. The positions of the sperm head at each frame are indicated by red circles, and intersections of the instantaneous swimming path with the average path are marked by blue hexagons. Sperm motility parameters used in this study include curvilinear velocity (VCL), representing the average point-to-point velocity of the sperm head in successive frames; average path velocity (VAP), denoting the projected point-to-point average velocity of the sperm head along its average path; straight-line velocity (VSL), reflecting the velocity of sperm based on its net displacement between the first and last frames; amplitude of lateral head displacement (ALH), indicating the average amplitude of lateral deviation of the sperm head from the average path; and beat cross frequency (BCF), representing the rate at which the sperm head crosses the average path. (b) Illustration of three different excitation setups involving pulsed ultrasound exposure at 20-minute, 10-minute, and 5-minute repetition times. (c) Schematic representation of exposure repetition time, monitoring duration, and tracking period for sperm cells exposed to pulsed ultrasound with the 5-minute repetition time.

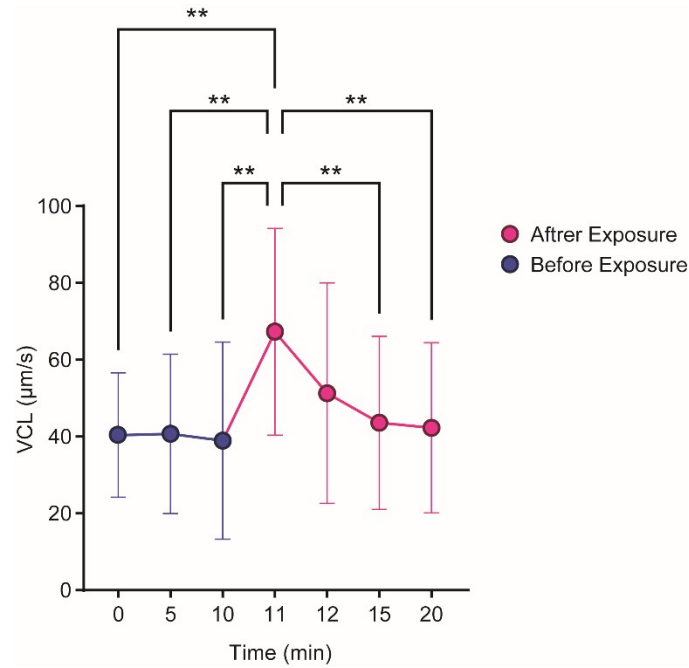

**Figure S2. Temporal variation of sperm VCL upon exposure to a 10-second long, 800 mW, and 40 MHz ultrasound pulse at t = 10 minutes (n=20).** Sperm motility significantly decreased to pre-exposure levels within 5 minutes post-exposure to a single pulse. Values are reported as mean  $\pm$  s.d. Statistical significance was determined using one-way ANOVA matched values with Tukey's multiple-comparison test (\*\*  $P \leq 0.01$ ).

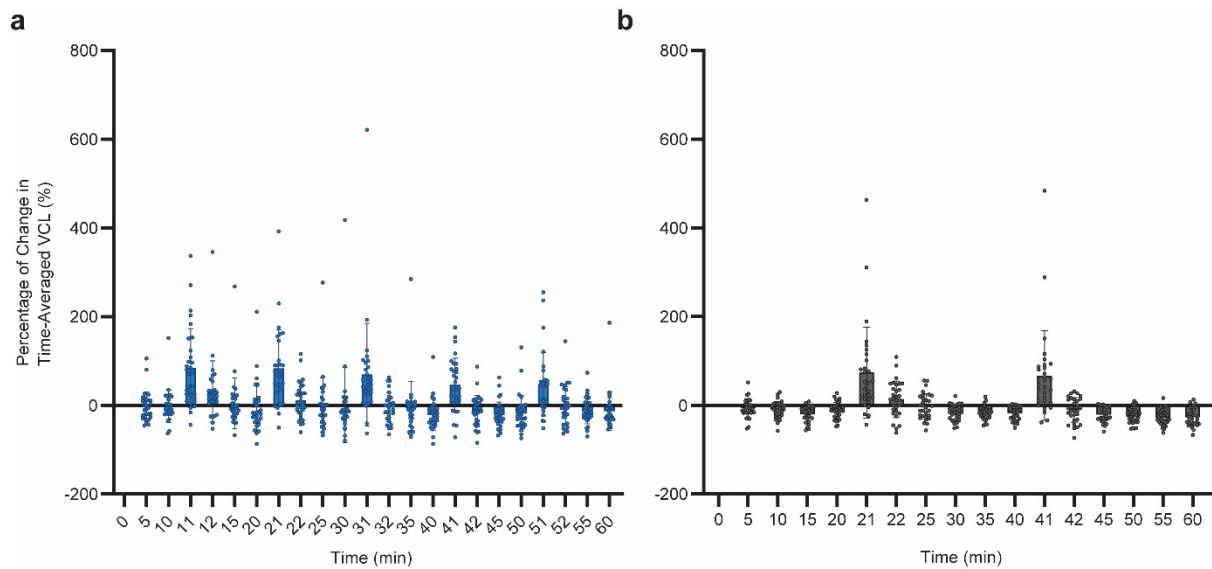

**Figure S3. Percentage change in single sperm VCL with respect to corresponding single sperm initial VCL values.** Sperm cells exposed to higher ultrasound exposure rates showed increased motility in a greater number of tracking periods. (a) Percentage change in single cell VCL for sperm cells exposed to pulsed ultrasound with the 10-minute repetition time and (b) percentage change in single cell VCL for sperm cells exposed to pulsed ultrasound with the 20-minute repetition time. Values are reported as mean  $\pm$  s.d.

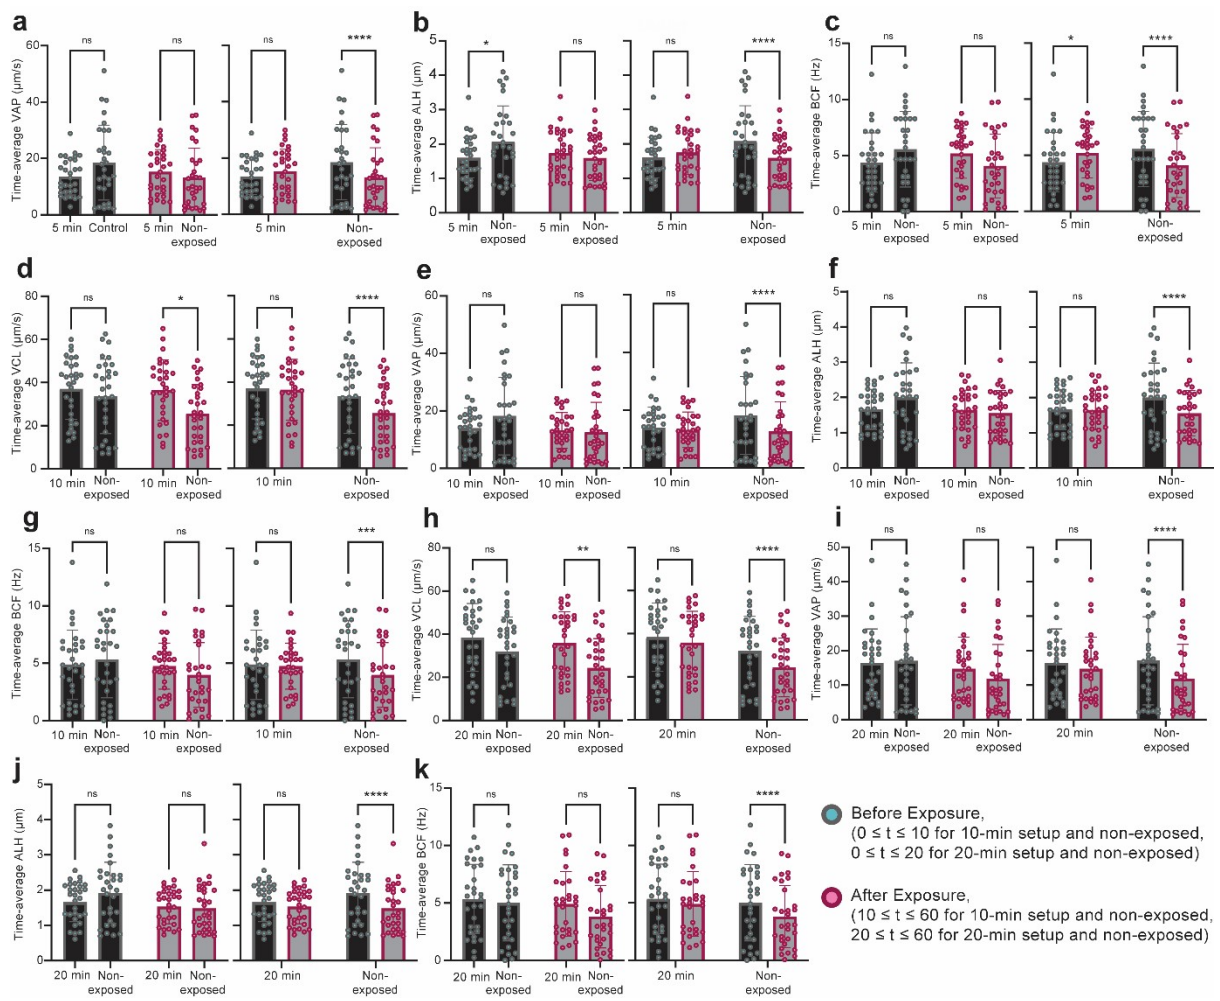

**Figure S4. Comparison of time-average motility values between sperm exposed to pulsed ultrasound with 5-, 10-, and 20-minute repetition times and non-exposed sperm (n=30, at each category).** Sperm cells exposed to higher ultrasound repetition rates showed a greater increase in average motility over the monitoring duration. Comparison of time-average (a) VAP, (b) ALH, and (c) BCF between sperm exposed to pulsed ultrasound with the 5-minute repetition time and non-exposed sperm. Comparison of time-average (d) VCL, (e) VAP, (f) ALH, (g) BCF between sperm exposed to pulsed ultrasound with the 10-minute repetition time and non-exposed sperm. Comparison of time-average (h) VCL, (i) VAP, (j) ALH, (k) BCF between sperm exposed to pulsed ultrasound with the 20-minute repetition time and non-exposed sperm. Values are reported as mean  $\pm$  s.d. Statistical significance was determined using two-way ANOVA with Šídák's multiple comparisons test.

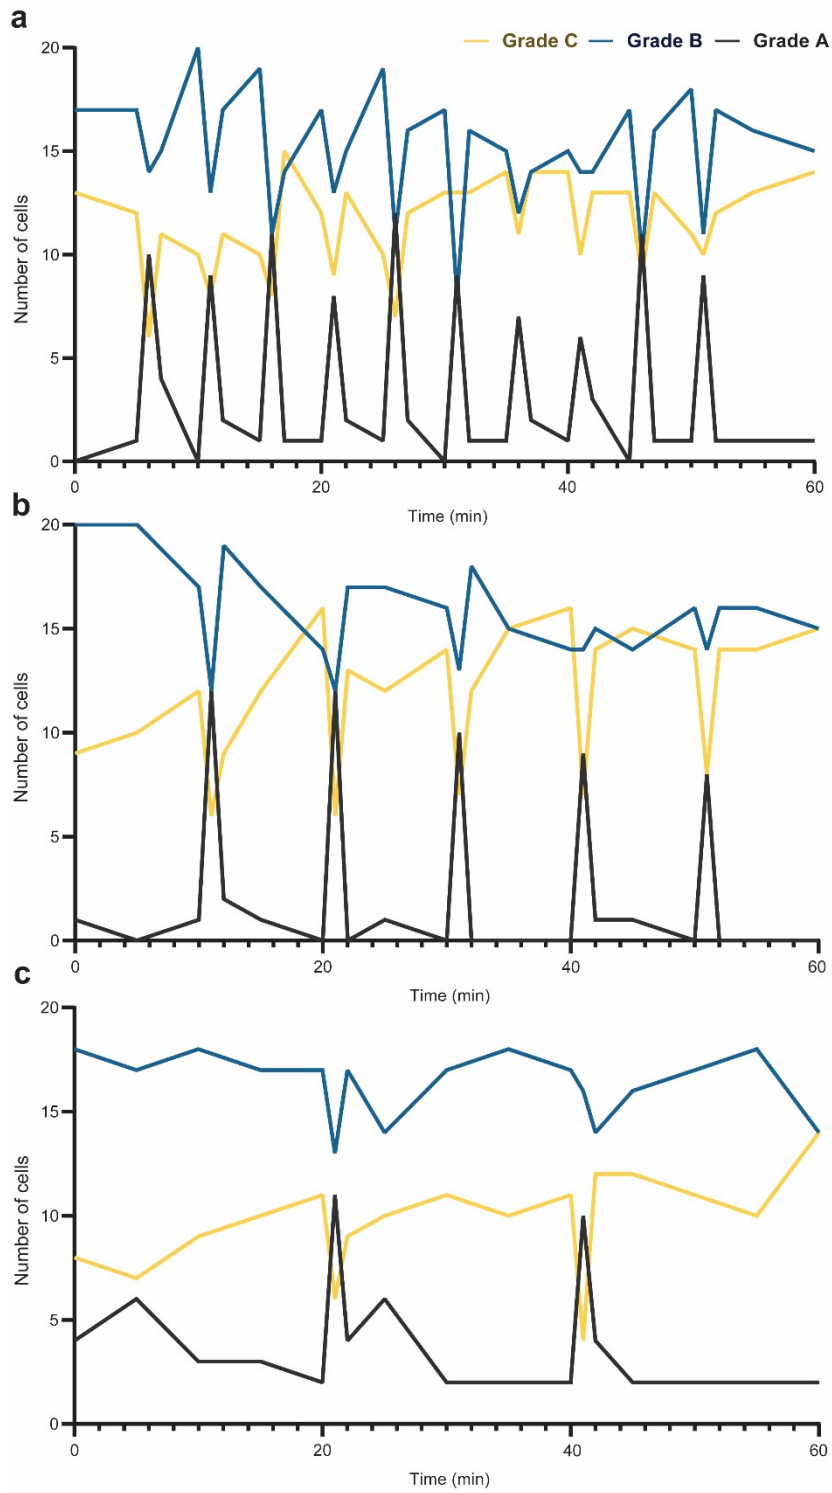

**Figure S5. Variation of the number of sperm cells at Grade A, B, and C motility grades for (a) 5-, (b) 10-, and (c) 20-minute repetition time exposure setups. Higher ultrasound exposure rates were associated with better preservation of sperm grading throughout the monitoring period.**

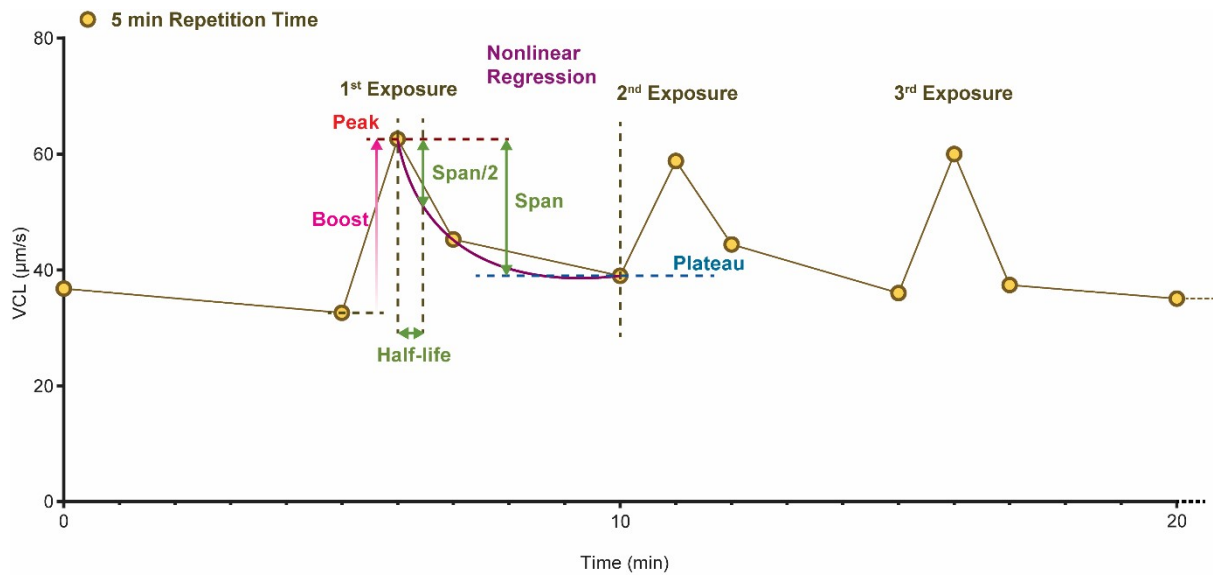

**Figure S6. Schematic representation of parameters employed for characterizing ultrasound-induced motility enhancement.** Boost is quantified as the percentage change in motility parameters following exposure relative to their respective pre-exposure values. Peak denotes the motility value immediately post-exposure. Plateau signifies the motility value reached after the settling period, defined by nonlinear regression analysis. Half-life represents the duration for the span (peak value minus plateau value) to decrease by half, as determined by nonlinear regression analysis.

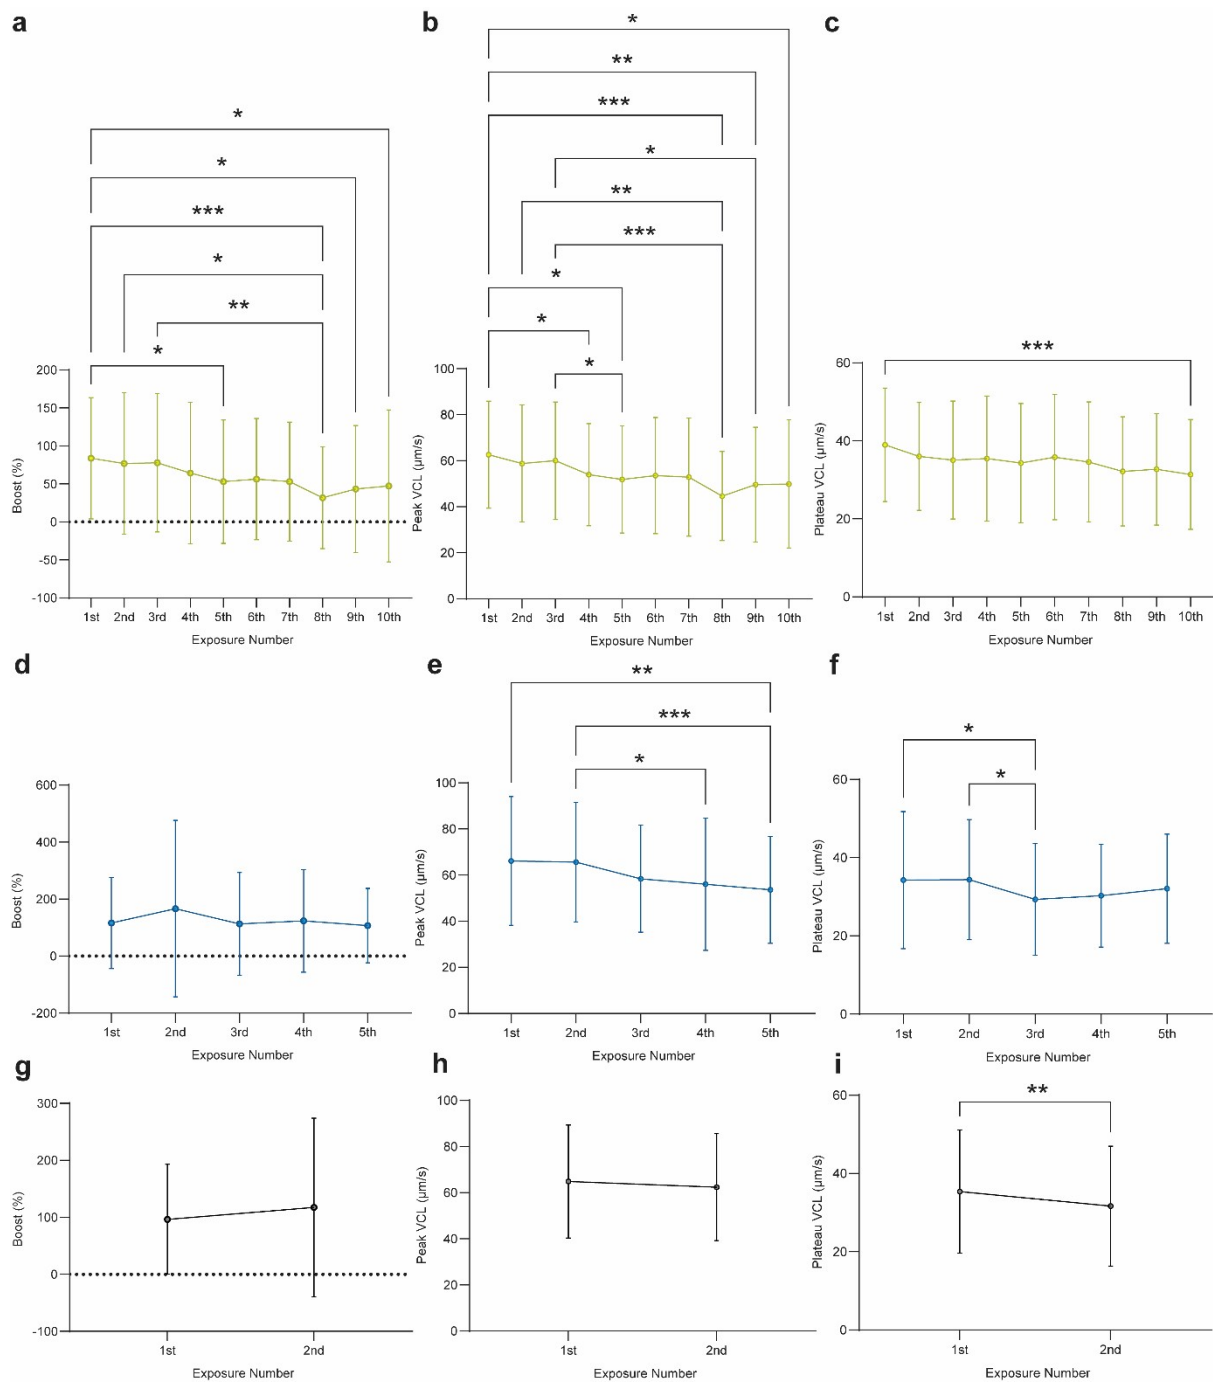

**Figure S7. Statistical significance for temporal variations of boost, peak, and plateau values at each exposure period.** Sperm cells exposed to 5-minute pulsed ultrasound exhibited lower average boost at the exposure tracking periods, with a decline over time. Boost, peak, and plateau values for sperm cells exposed to 5-minute (a-c), 10-minute (d-f), and 20-minute (g-i) repetition time pulsed ultrasound. Values are reported as mean  $\pm$  s.d. Statistical significance was determined using one-way ANOVA matched values with Tukey's multiple comparisons test (\*  $P \leq 0.05$ , \*\*  $P \leq 0.01$ , \*\*\*  $P \leq 0.001$ , and \*\*\*\*  $P \leq 0.0001$ ).

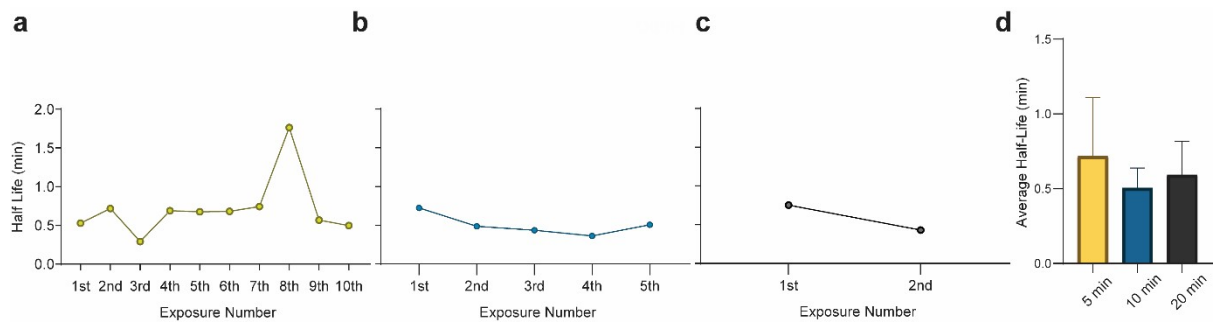

**Figure S8. Half-life values obtained by applying nonlinear regression to average VCL profiles.** Sperm cells in 5, 10, and 20-minute groups exhibited a 50% reduction in VCL boost 0.72, 0.50, and 0.59 minutes post-exposure, respectively. Half-life values of average VCL profile of sperm cells exposed to (a) 5-minute, (b) 10-minute, and (c) 20-minute repetition time pulsed ultrasound. (d) Average half-life values for each exposure setup. Values are reported as mean  $\pm$  s.d.



**Table S1. The statistical significance for comparison of VCL between different tracking periods for sperm cells exposed to 5-minute repetition time pulsed ultrasound (n=30, at each tracking period).** Statistical significance was determined using ordinary one-way ANOVA matched values with Tukey's multiple-comparison test (\* P ≤ 0.05, \*\* P ≤ 0.01, \*\*\* P ≤ 0.001, \*\*\*\* P ≤ 0.0001, and ns denotes not significant).

| Tukey's multiple comparisons test | Mean Diff. | 95.00% CI of diff. | Below threshold? | Summary | Adjusted P Value |
|-----------------------------------|------------|--------------------|------------------|---------|------------------|
| 0 vs. 5                           | 4.186      | -4.422 to 12.79    | No               | ns      | 0.9565           |
| 0 vs. 6                           | -25.83     | -39.47 to -12.20   | Yes              | ****    | <0.0001          |
| 0 vs. 7                           | -8.480     | -22.01 to 5.049    | No               | ns      | 0.6963           |
| 0 vs. 10                          | -2.198     | -12.11 to 7.714    | No               | ns      | >0.9999          |
| 0 vs. 11                          | -22.04     | -40.38 to -3.695   | Yes              | **      | 0.0068           |
| 0 vs. 12                          | -7.648     | -16.78 to 1.487    | No               | ns      | 0.2021           |
| 0 vs. 15                          | 0.7428     | -9.196 to 10.68    | No               | ns      | >0.9999          |
| 0 vs. 16                          | -23.24     | -39.93 to -6.546   | Yes              | ***     | 0.0009           |
| 0 vs. 17                          | -0.6414    | -10.24 to 8.957    | No               | ns      | >0.9999          |
| 0 vs. 20                          | 1.698      | -7.055 to 10.45    | No               | ns      | >0.9999          |
| 0 vs. 21                          | -17.18     | -34.10 to -0.2610  | Yes              | *       | 0.0433           |
| 0 vs. 22                          | -5.254     | -16.92 to 6.417    | No               | ns      | 0.9811           |
| 0 vs. 25                          | 1.310      | -9.038 to 11.66    | No               | ns      | >0.9999          |
| 0 vs. 26                          | -15.12     | -31.83 to 1.585    | No               | ns      | 0.1167           |
| 0 vs. 27                          | -3.655     | -16.00 to 8.685    | No               | ns      | >0.9999          |
| 0 vs. 30                          | 2.457      | -7.361 to 12.28    | No               | ns      | >0.9999          |
| 0 vs. 31                          | -16.77     | -34.01 to 0.4687   | No               | ns      | 0.0643           |
| 0 vs. 32                          | -5.287     | -19.57 to 8.996    | No               | ns      | 0.9986           |
| 0 vs. 35                          | 0.9267     | -9.090 to 10.94    | No               | ns      | >0.9999          |
| 0 vs. 36                          | -16.08     | -32.84 to 0.6785   | No               | ns      | 0.0725           |
| 0 vs. 37                          | -4.736     | -16.61 to 7.137    | No               | ns      | 0.9959           |
| 0 vs. 40                          | 2.178      | -8.005 to 12.36    | No               | ns      | >0.9999          |
| 0 vs. 41                          | -7.873     | -22.42 to 6.675    | No               | ns      | 0.8861           |
| 0 vs. 42                          | -2.760     | -12.88 to 7.356    | No               | ns      | >0.9999          |
| 0 vs. 45                          | 4.595      | -8.367 to 17.56    | No               | ns      | 0.9993           |

|          |         |                  |     |      |         |
|----------|---------|------------------|-----|------|---------|
| 0 vs. 46 | -12.86  | -29.66 to 3.937  | No  | ns   | 0.3370  |
| 0 vs. 47 | -0.8591 | -11.82 to 10.10  | No  | ns   | >0.9999 |
| 0 vs. 50 | 4.050   | -5.959 to 14.06  | No  | ns   | 0.9950  |
| 0 vs. 51 | -13.14  | -33.65 to 7.373  | No  | ns   | 0.6598  |
| 0 vs. 52 | 0.8320  | -8.350 to 10.01  | No  | ns   | >0.9999 |
| 0 vs. 55 | 5.390   | -4.941 to 15.72  | No  | ns   | 0.9160  |
| 0 vs. 60 | 5.609   | -3.257 to 14.48  | No  | ns   | 0.6808  |
| 5 vs. 6  | -30.02  | -42.93 to -17.11 | Yes | **** | <0.0001 |
| 5 vs. 7  | -12.67  | -29.86 to 4.530  | No  | ns   | 0.4146  |
| 5 vs. 10 | -6.383  | -13.47 to 0.6997 | No  | ns   | 0.1225  |
| 5 vs. 11 | -26.22  | -43.78 to -8.663 | Yes | ***  | 0.0003  |
| 5 vs. 12 | -11.83  | -20.90 to -2.772 | Yes | **   | 0.0021  |
| 5 vs. 15 | -3.443  | -10.20 to 3.310  | No  | ns   | 0.9378  |
| 5 vs. 16 | -27.42  | -44.73 to -10.12 | Yes | ***  | 0.0001  |
| 5 vs. 17 | -4.827  | -16.83 to 7.177  | No  | ns   | 0.9962  |
| 5 vs. 20 | -2.488  | -10.00 to 5.028  | No  | ns   | 0.9998  |
| 5 vs. 21 | -21.37  | -36.79 to -5.939 | Yes | ***  | 0.0009  |
| 5 vs. 22 | -9.440  | -21.77 to 2.895  | No  | ns   | 0.3459  |
| 5 vs. 25 | -2.875  | -10.43 to 4.683  | No  | ns   | 0.9983  |
| 5 vs. 26 | -19.31  | -34.15 to -4.469 | Yes | **   | 0.0022  |
| 5 vs. 27 | -7.841  | -17.77 to 2.087  | No  | ns   | 0.2930  |
| 5 vs. 30 | -1.728  | -10.46 to 7.002  | No  | ns   | >0.9999 |
| 5 vs. 31 | -20.96  | -37.20 to -4.718 | Yes | **   | 0.0025  |
| 5 vs. 32 | -9.473  | -22.00 to 3.056  | No  | ns   | 0.3671  |
| 5 vs. 35 | -3.259  | -10.44 to 3.918  | No  | ns   | 0.9817  |
| 5 vs. 36 | -20.27  | -37.69 to -2.843 | Yes | **   | 0.0097  |
| 5 vs. 37 | -8.921  | -21.49 to 3.647  | No  | ns   | 0.4837  |
| 5 vs. 40 | -2.007  | -9.495 to 5.480  | No  | ns   | >0.9999 |
| 5 vs. 41 | -12.06  | -24.78 to 0.6597 | No  | ns   | 0.0810  |
| 5 vs. 42 | -6.945  | -16.82 to 2.930  | No  | ns   | 0.5013  |
| 5 vs. 45 | 0.4093  | -10.16 to 10.98  | No  | ns   | >0.9999 |

|          |         |                   |     |      |         |
|----------|---------|-------------------|-----|------|---------|
| 5 vs. 46 | -17.05  | -33.36 to -0.7341 | Yes | *    | 0.0323  |
| 5 vs. 47 | -5.045  | -17.65 to 7.558   | No  | ns   | 0.9964  |
| 5 vs. 50 | -0.1351 | -7.059 to 6.788   | No  | ns   | >0.9999 |
| 5 vs. 51 | -17.32  | -36.99 to 2.340   | No  | ns   | 0.1453  |
| 5 vs. 52 | -3.354  | -13.71 to 7.000   | No  | ns   | 0.9999  |
| 5 vs. 55 | 1.205   | -6.843 to 9.252   | No  | ns   | >0.9999 |
| 5 vs. 60 | 1.424   | -5.871 to 8.719   | No  | ns   | >0.9999 |
| 6 vs. 7  | 17.35   | -4.007 to 38.72   | No  | ns   | 0.2490  |
| 6 vs. 10 | 23.64   | 9.795 to 37.48    | Yes | **** | <0.0001 |
| 6 vs. 11 | 3.798   | -7.105 to 14.70   | No  | ns   | 0.9996  |
| 6 vs. 12 | 18.19   | 4.942 to 31.43    | Yes | **   | 0.0010  |
| 6 vs. 15 | 26.58   | 12.31 to 40.84    | Yes | **** | <0.0001 |
| 6 vs. 16 | 2.598   | -7.684 to 12.88   | No  | ns   | >0.9999 |
| 6 vs. 17 | 25.19   | 9.101 to 41.29    | Yes | ***  | 0.0001  |
| 6 vs. 20 | 27.53   | 14.54 to 40.53    | Yes | **** | <0.0001 |
| 6 vs. 21 | 8.655   | -1.474 to 18.78   | No  | ns   | 0.1803  |
| 6 vs. 22 | 20.58   | 6.266 to 34.90    | Yes | ***  | 0.0005  |
| 6 vs. 25 | 27.15   | 12.01 to 42.28    | Yes | **** | <0.0001 |
| 6 vs. 26 | 10.71   | -0.4323 to 21.85  | No  | ns   | 0.0719  |
| 6 vs. 27 | 22.18   | 7.984 to 36.38    | Yes | ***  | 0.0001  |
| 6 vs. 30 | 28.29   | 12.29 to 44.29    | Yes | **** | <0.0001 |
| 6 vs. 31 | 9.062   | -4.186 to 22.31   | No  | ns   | 0.5535  |
| 6 vs. 32 | 20.55   | 6.828 to 34.27    | Yes | ***  | 0.0003  |
| 6 vs. 35 | 26.76   | 12.54 to 40.99    | Yes | **** | <0.0001 |
| 6 vs. 36 | 9.752   | -3.749 to 23.25   | No  | ns   | 0.4508  |
| 6 vs. 37 | 21.10   | 2.753 to 39.45    | Yes | *    | 0.0111  |
| 6 vs. 40 | 28.01   | 13.56 to 42.46    | Yes | **** | <0.0001 |
| 6 vs. 41 | 17.96   | 4.506 to 31.42    | Yes | **   | 0.0016  |
| 6 vs. 42 | 23.08   | 8.973 to 37.18    | Yes | **** | <0.0001 |
| 6 vs. 45 | 30.43   | 13.27 to 47.59    | Yes | **** | <0.0001 |
| 6 vs. 46 | 12.98   | 0.1707 to 25.78   | Yes | *    | 0.0440  |

|          |        |                 |     |      |         |
|----------|--------|-----------------|-----|------|---------|
| 6 vs. 47 | 24.98  | 11.53 to 38.42  | Yes | **** | <0.0001 |
| 6 vs. 50 | 29.89  | 15.33 to 44.44  | Yes | **** | <0.0001 |
| 6 vs. 51 | 12.70  | -2.854 to 28.25 | No  | ns   | 0.2416  |
| 6 vs. 52 | 26.67  | 13.49 to 39.84  | Yes | **** | <0.0001 |
| 6 vs. 55 | 31.23  | 17.89 to 44.56  | Yes | **** | <0.0001 |
| 6 vs. 60 | 31.44  | 15.44 to 47.45  | Yes | **** | <0.0001 |
| 7 vs. 10 | 6.282  | -10.87 to 23.43 | No  | ns   | 0.9991  |
| 7 vs. 11 | -13.56 | -38.70 to 11.59 | No  | ns   | 0.8979  |
| 7 vs. 12 | 0.8321 | -15.25 to 16.92 | No  | ns   | >0.9999 |
| 7 vs. 15 | 9.223  | -7.136 to 25.58 | No  | ns   | 0.8545  |
| 7 vs. 16 | -14.76 | -38.03 to 8.518 | No  | ns   | 0.6900  |
| 7 vs. 17 | 7.839  | -5.608 to 21.29 | No  | ns   | 0.8150  |
| 7 vs. 20 | 10.18  | -4.845 to 25.20 | No  | ns   | 0.5716  |
| 7 vs. 21 | -8.700 | -32.17 to 14.77 | No  | ns   | 0.9989  |
| 7 vs. 22 | 3.226  | -10.90 to 17.35 | No  | ns   | >0.9999 |
| 7 vs. 25 | 9.790  | -5.948 to 25.53 | No  | ns   | 0.7212  |
| 7 vs. 26 | -6.644 | -29.23 to 15.94 | No  | ns   | >0.9999 |
| 7 vs. 27 | 4.825  | -12.53 to 22.18 | No  | ns   | >0.9999 |
| 7 vs. 30 | 10.94  | -5.458 to 27.33 | No  | ns   | 0.6001  |
| 7 vs. 31 | -8.293 | -33.22 to 16.64 | No  | ns   | 0.9998  |
| 7 vs. 32 | 3.193  | -17.68 to 24.07 | No  | ns   | >0.9999 |
| 7 vs. 35 | 9.407  | -6.227 to 25.04 | No  | ns   | 0.7719  |
| 7 vs. 36 | -7.603 | -31.57 to 16.36 | No  | ns   | >0.9999 |
| 7 vs. 37 | 3.744  | -10.17 to 17.66 | No  | ns   | >0.9999 |
| 7 vs. 40 | 10.66  | -4.912 to 26.23 | No  | ns   | 0.5522  |
| 7 vs. 41 | 0.6071 | -20.45 to 21.66 | No  | ns   | >0.9999 |
| 7 vs. 42 | 5.721  | -10.66 to 22.11 | No  | ns   | 0.9996  |
| 7 vs. 45 | 13.08  | -5.493 to 31.64 | No  | ns   | 0.4989  |
| 7 vs. 46 | -4.380 | -26.56 to 17.80 | No  | ns   | >0.9999 |
| 7 vs. 47 | 7.621  | -9.803 to 25.05 | No  | ns   | 0.9883  |
| 7 vs. 50 | 12.53  | -4.640 to 29.70 | No  | ns   | 0.4317  |

|           |         |                  |     |    |         |
|-----------|---------|------------------|-----|----|---------|
| 7 vs. 51  | -4.659  | -30.79 to 21.47  | No  | ns | >0.9999 |
| 7 vs. 52  | 9.312   | -7.658 to 26.28  | No  | ns | 0.8820  |
| 7 vs. 55  | 13.87   | -4.287 to 32.03  | No  | ns | 0.3491  |
| 7 vs. 60  | 14.09   | -1.122 to 29.30  | No  | ns | 0.0985  |
| 10 vs. 11 | -19.84  | -37.50 to -2.182 | Yes | *  | 0.0147  |
| 10 vs. 12 | -5.450  | -15.07 to 4.173  | No  | ns | 0.8494  |
| 10 vs. 15 | 2.941   | -3.853 to 9.735  | No  | ns | 0.9898  |
| 10 vs. 16 | -21.04  | -38.57 to -3.509 | Yes | ** | 0.0066  |
| 10 vs. 17 | 1.557   | -8.275 to 11.39  | No  | ns | >0.9999 |
| 10 vs. 20 | 3.896   | -3.432 to 11.22  | No  | ns | 0.9093  |
| 10 vs. 21 | -14.98  | -30.56 to 0.5992 | No  | ns | 0.0717  |
| 10 vs. 22 | -3.056  | -13.61 to 7.501  | No  | ns | >0.9999 |
| 10 vs. 25 | 3.508   | -4.822 to 11.84  | No  | ns | 0.9928  |
| 10 vs. 26 | -12.93  | -28.95 to 3.101  | No  | ns | 0.2600  |
| 10 vs. 27 | -1.457  | -12.63 to 9.715  | No  | ns | >0.9999 |
| 10 vs. 30 | 4.655   | -5.115 to 14.43  | No  | ns | 0.9686  |
| 10 vs. 31 | -14.57  | -30.95 to 1.804  | No  | ns | 0.1349  |
| 10 vs. 32 | -3.089  | -16.75 to 10.57  | No  | ns | >0.9999 |
| 10 vs. 35 | 3.125   | -5.782 to 12.03  | No  | ns | 0.9995  |
| 10 vs. 36 | -13.88  | -31.58 to 3.812  | No  | ns | 0.3037  |
| 10 vs. 37 | -2.538  | -16.12 to 11.05  | No  | ns | >0.9999 |
| 10 vs. 40 | 4.376   | -3.439 to 12.19  | No  | ns | 0.8618  |
| 10 vs. 41 | -5.675  | -19.07 to 7.723  | No  | ns | 0.9923  |
| 10 vs. 42 | -0.5616 | -11.87 to 10.75  | No  | ns | >0.9999 |
| 10 vs. 45 | 6.793   | -3.498 to 17.08  | No  | ns | 0.6195  |
| 10 vs. 46 | -10.66  | -26.52 to 5.194  | No  | ns | 0.5855  |
| 10 vs. 47 | 1.339   | -10.27 to 12.95  | No  | ns | >0.9999 |
| 10 vs. 50 | 6.248   | -2.103 to 14.60  | No  | ns | 0.3860  |
| 10 vs. 51 | -10.94  | -30.11 to 8.226  | No  | ns | 0.8405  |
| 10 vs. 52 | 3.030   | -7.048 to 13.11  | No  | ns | >0.9999 |
| 10 vs. 55 | 7.588   | 1.204 to 13.97   | Yes | ** | 0.0074  |

|           |        |                  |     |      |         |
|-----------|--------|------------------|-----|------|---------|
| 10 vs. 60 | 7.807  | -1.556 to 17.17  | No  | ns   | 0.2120  |
| 11 vs. 12 | 14.39  | -2.988 to 31.77  | No  | ns   | 0.2216  |
| 11 vs. 15 | 22.78  | 4.660 to 40.90   | Yes | **   | 0.0036  |
| 11 vs. 16 | -1.201 | -12.58 to 10.18  | No  | ns   | >0.9999 |
| 11 vs. 17 | 21.40  | 1.673 to 41.12   | Yes | *    | 0.0217  |
| 11 vs. 20 | 23.73  | 5.358 to 42.11   | Yes | **   | 0.0025  |
| 11 vs. 21 | 4.856  | -2.656 to 12.37  | No  | ns   | 0.6566  |
| 11 vs. 22 | 16.78  | -0.3331 to 33.90 | No  | ns   | 0.0601  |
| 11 vs. 25 | 23.35  | 4.375 to 42.32   | Yes | **   | 0.0048  |
| 11 vs. 26 | 6.913  | -4.237 to 18.06  | No  | ns   | 0.7265  |
| 11 vs. 27 | 18.38  | 0.7134 to 36.05  | Yes | *    | 0.0338  |
| 11 vs. 30 | 24.49  | 6.315 to 42.67   | Yes | **   | 0.0014  |
| 11 vs. 31 | 5.264  | -7.434 to 17.96  | No  | ns   | 0.9942  |
| 11 vs. 32 | 16.75  | -1.488 to 34.99  | No  | ns   | 0.1055  |
| 11 vs. 35 | 22.96  | 4.769 to 41.16   | Yes | **   | 0.0034  |
| 11 vs. 36 | 5.954  | -6.420 to 18.33  | No  | ns   | 0.9651  |
| 11 vs. 37 | 17.30  | -4.970 to 39.57  | No  | ns   | 0.3203  |
| 11 vs. 40 | 24.21  | 6.791 to 41.64   | Yes | ***  | 0.0009  |
| 11 vs. 41 | 14.16  | 0.01669 to 28.31 | Yes | *    | 0.0494  |
| 11 vs. 42 | 19.28  | 1.567 to 36.99   | Yes | *    | 0.0210  |
| 11 vs. 45 | 26.63  | 8.210 to 45.05   | Yes | ***  | 0.0005  |
| 11 vs. 46 | 9.177  | -4.389 to 22.74  | No  | ns   | 0.5744  |
| 11 vs. 47 | 21.18  | 4.025 to 38.33   | Yes | **   | 0.0046  |
| 11 vs. 50 | 26.09  | 8.655 to 43.52   | Yes | ***  | 0.0003  |
| 11 vs. 51 | 8.898  | -5.314 to 23.11  | No  | ns   | 0.7108  |
| 11 vs. 52 | 22.87  | 5.899 to 39.84   | Yes | **   | 0.0014  |
| 11 vs. 55 | 27.43  | 11.03 to 43.82   | Yes | **** | <0.0001 |
| 11 vs. 60 | 27.65  | 9.005 to 46.29   | Yes | ***  | 0.0003  |
| 12 vs. 15 | 8.391  | -0.3352 to 17.12 | No  | ns   | 0.0716  |
| 12 vs. 16 | -15.59 | -29.65 to -1.527 | Yes | *    | 0.0171  |
| 12 vs. 17 | 7.007  | -4.358 to 18.37  | No  | ns   | 0.7353  |

|           |         |                  |     |     |         |
|-----------|---------|------------------|-----|-----|---------|
| 12 vs. 20 | 9.346   | 0.9257 to 17.77  | Yes | *   | 0.0169  |
| 12 vs. 21 | -9.532  | -25.17 to 6.105  | No  | ns  | 0.7527  |
| 12 vs. 22 | 2.394   | -7.587 to 12.38  | No  | ns  | >0.9999 |
| 12 vs. 25 | 8.958   | 0.3556 to 17.56  | Yes | *   | 0.0335  |
| 12 vs. 26 | -7.476  | -21.04 to 6.088  | No  | ns  | 0.8778  |
| 12 vs. 27 | 3.993   | -4.421 to 12.41  | No  | ns  | 0.9699  |
| 12 vs. 30 | 10.11   | 0.06951 to 20.14 | Yes | *   | 0.0468  |
| 12 vs. 31 | -9.125  | -23.84 to 5.590  | No  | ns  | 0.7263  |
| 12 vs. 32 | 2.361   | -8.266 to 12.99  | No  | ns  | >0.9999 |
| 12 vs. 35 | 8.575   | 0.6202 to 16.53  | Yes | *   | 0.0233  |
| 12 vs. 36 | -8.435  | -25.11 to 8.237  | No  | ns  | 0.9422  |
| 12 vs. 37 | 2.912   | -7.551 to 13.38  | No  | ns  | >0.9999 |
| 12 vs. 40 | 9.826   | 1.290 to 18.36   | Yes | *   | 0.0110  |
| 12 vs. 41 | -0.2251 | -12.55 to 12.10  | No  | ns  | >0.9999 |
| 12 vs. 42 | 4.889   | -3.166 to 12.94  | No  | ns  | 0.7593  |
| 12 vs. 45 | 12.24   | -0.4003 to 24.89 | No  | ns  | 0.0673  |
| 12 vs. 46 | -5.212  | -19.31 to 8.890  | No  | ns  | 0.9989  |
| 12 vs. 47 | 6.789   | -2.414 to 15.99  | No  | ns  | 0.4117  |
| 12 vs. 50 | 11.70   | 3.469 to 19.93   | Yes | *** | 0.0006  |
| 12 vs. 51 | -5.491  | -23.74 to 12.75  | No  | ns  | >0.9999 |
| 12 vs. 52 | 8.480   | 0.3728 to 16.59  | Yes | *   | 0.0320  |
| 12 vs. 55 | 13.04   | 3.061 to 23.02   | Yes | **  | 0.0021  |
| 12 vs. 60 | 13.26   | 4.566 to 21.95   | Yes | *** | 0.0002  |
| 15 vs. 16 | -23.98  | -40.38 to -7.583 | Yes | *** | 0.0004  |
| 15 vs. 17 | -1.384  | -10.47 to 7.706  | No  | ns  | >0.9999 |
| 15 vs. 20 | 0.9549  | -5.185 to 7.094  | No  | ns  | >0.9999 |
| 15 vs. 21 | -17.92  | -32.66 to -3.183 | Yes | **  | 0.0056  |
| 15 vs. 22 | -5.997  | -16.91 to 4.920  | No  | ns  | 0.8810  |
| 15 vs. 25 | 0.5673  | -8.050 to 9.185  | No  | ns  | >0.9999 |
| 15 vs. 26 | -15.87  | -29.28 to -2.454 | Yes | **  | 0.0079  |
| 15 vs. 27 | -4.398  | -15.05 to 6.250  | No  | ns  | 0.9945  |

|           |         |                   |     |      |         |
|-----------|---------|-------------------|-----|------|---------|
| 15 vs. 30 | 1.714   | -6.215 to 9.644   | No  | ns   | >0.9999 |
| 15 vs. 31 | -17.52  | -32.03 to -2.997  | Yes | **   | 0.0062  |
| 15 vs. 32 | -6.030  | -18.68 to 6.617   | No  | ns   | 0.9683  |
| 15 vs. 35 | 0.1839  | -6.981 to 7.349   | No  | ns   | >0.9999 |
| 15 vs. 36 | -16.83  | -32.77 to -0.8816 | Yes | *    | 0.0292  |
| 15 vs. 37 | -5.479  | -17.58 to 6.627   | No  | ns   | 0.9824  |
| 15 vs. 40 | 1.435   | -5.342 to 8.213   | No  | ns   | >0.9999 |
| 15 vs. 41 | -8.616  | -21.26 to 4.025   | No  | ns   | 0.5602  |
| 15 vs. 42 | -3.502  | -14.96 to 7.957   | No  | ns   | >0.9999 |
| 15 vs. 45 | 3.852   | -6.168 to 13.87   | No  | ns   | 0.9980  |
| 15 vs. 46 | -13.60  | -28.15 to 0.9473  | No  | ns   | 0.0912  |
| 15 vs. 47 | -1.602  | -11.47 to 8.262   | No  | ns   | >0.9999 |
| 15 vs. 50 | 3.308   | -2.405 to 9.020   | No  | ns   | 0.8235  |
| 15 vs. 51 | -13.88  | -30.79 to 3.024   | No  | ns   | 0.2335  |
| 15 vs. 52 | 0.08914 | -8.584 to 8.762   | No  | ns   | >0.9999 |
| 15 vs. 55 | 4.647   | -3.149 to 12.44   | No  | ns   | 0.7851  |
| 15 vs. 60 | 4.866   | -3.550 to 13.28   | No  | ns   | 0.8252  |
| 16 vs. 17 | 22.60   | 4.734 to 40.46    | Yes | **   | 0.0033  |
| 16 vs. 20 | 24.93   | 9.341 to 40.53    | Yes | **** | <0.0001 |
| 16 vs. 21 | 6.057   | -4.748 to 16.86   | No  | ns   | 0.8607  |
| 16 vs. 22 | 17.98   | 2.298 to 33.67    | Yes | *    | 0.0116  |
| 16 vs. 25 | 24.55   | 7.662 to 41.43    | Yes | ***  | 0.0004  |
| 16 vs. 26 | 8.113   | -1.812 to 18.04   | No  | ns   | 0.2399  |
| 16 vs. 27 | 19.58   | 4.681 to 34.48    | Yes | **   | 0.0019  |
| 16 vs. 30 | 25.69   | 8.256 to 43.13    | Yes | ***  | 0.0003  |
| 16 vs. 31 | 6.464   | -4.769 to 17.70   | No  | ns   | 0.8310  |
| 16 vs. 32 | 17.95   | 3.636 to 32.26    | Yes | **   | 0.0037  |
| 16 vs. 35 | 24.16   | 8.341 to 39.99    | Yes | ***  | 0.0002  |
| 16 vs. 36 | 7.154   | -4.777 to 19.09   | No  | ns   | 0.7769  |
| 16 vs. 37 | 18.50   | -0.9623 to 37.97  | No  | ns   | 0.0792  |
| 16 vs. 40 | 25.42   | 9.327 to 41.50    | Yes | ***  | 0.0001  |



|           |         |                  |     |      |         |
|-----------|---------|------------------|-----|------|---------|
| 16 vs. 41 | 15.36   | 3.063 to 27.66   | Yes | **   | 0.0039  |
| 16 vs. 42 | 20.48   | 5.382 to 35.57   | Yes | **   | 0.0012  |
| 16 vs. 45 | 27.83   | 9.483 to 46.18   | Yes | ***  | 0.0002  |
| 16 vs. 46 | 10.38   | -0.8003 to 21.55 | No  | ns   | 0.0966  |
| 16 vs. 47 | 22.38   | 9.072 to 35.68   | Yes | **** | <0.0001 |
| 16 vs. 50 | 27.29   | 11.41 to 43.17   | Yes | **** | <0.0001 |
| 16 vs. 51 | 10.10   | -2.363 to 22.56  | No  | ns   | 0.2527  |
| 16 vs. 52 | 24.07   | 9.366 to 38.77   | Yes | **** | <0.0001 |
| 16 vs. 55 | 28.63   | 12.96 to 44.30   | Yes | **** | <0.0001 |
| 16 vs. 60 | 28.85   | 10.97 to 46.72   | Yes | **** | <0.0001 |
| 17 vs. 20 | 2.339   | -5.805 to 10.48  | No  | ns   | >0.9999 |
| 17 vs. 21 | -16.54  | -34.52 to 1.445  | No  | ns   | 0.1044  |
| 17 vs. 22 | -4.613  | -16.76 to 7.531  | No  | ns   | 0.9983  |
| 17 vs. 25 | 1.951   | -9.879 to 13.78  | No  | ns   | >0.9999 |
| 17 vs. 26 | -14.48  | -31.39 to 2.421  | No  | ns   | 0.1771  |
| 17 vs. 27 | -3.014  | -15.06 to 9.033  | No  | ns   | >0.9999 |
| 17 vs. 30 | 3.099   | -8.659 to 14.86  | No  | ns   | >0.9999 |
| 17 vs. 31 | -16.13  | -33.46 to 1.198  | No  | ns   | 0.0946  |
| 17 vs. 32 | -4.646  | -19.23 to 9.942  | No  | ns   | >0.9999 |
| 17 vs. 35 | 1.568   | -10.10 to 13.23  | No  | ns   | >0.9999 |
| 17 vs. 36 | -15.44  | -33.91 to 3.027  | No  | ns   | 0.2083  |
| 17 vs. 37 | -4.095  | -17.73 to 9.545  | No  | ns   | >0.9999 |
| 17 vs. 40 | 2.820   | -7.133 to 12.77  | No  | ns   | >0.9999 |
| 17 vs. 41 | -7.232  | -22.78 to 8.316  | No  | ns   | 0.9759  |
| 17 vs. 42 | -2.118  | -15.58 to 11.34  | No  | ns   | >0.9999 |
| 17 vs. 45 | 5.236   | -7.492 to 17.96  | No  | ns   | 0.9948  |
| 17 vs. 46 | -12.22  | -28.23 to 3.798  | No  | ns   | 0.3514  |
| 17 vs. 47 | -0.2177 | -12.29 to 11.86  | No  | ns   | >0.9999 |
| 17 vs. 50 | 4.692   | -6.883 to 16.27  | No  | ns   | 0.9957  |
| 17 vs. 51 | -12.50  | -31.18 to 6.190  | No  | ns   | 0.5955  |
| 17 vs. 52 | 1.473   | -10.20 to 13.15  | No  | ns   | >0.9999 |

|           |         |                   |     |    |         |
|-----------|---------|-------------------|-----|----|---------|
| 17 vs. 55 | 6.031   | -4.904 to 16.97   | No  | ns | 0.8771  |
| 17 vs. 60 | 6.251   | -5.884 to 18.39   | No  | ns | 0.9316  |
| 20 vs. 21 | -18.88  | -34.66 to -3.092  | Yes | ** | 0.0069  |
| 20 vs. 22 | -6.952  | -17.36 to 3.458   | No  | ns | 0.5981  |
| 20 vs. 25 | -0.3876 | -8.415 to 7.639   | No  | ns | >0.9999 |
| 20 vs. 26 | -16.82  | -31.82 to -1.827  | Yes | *  | 0.0149  |
| 20 vs. 27 | -5.353  | -15.26 to 4.552   | No  | ns | 0.8958  |
| 20 vs. 30 | 0.7596  | -8.954 to 10.47   | No  | ns | >0.9999 |
| 20 vs. 31 | -18.47  | -35.13 to -1.810  | Yes | *  | 0.0171  |
| 20 vs. 32 | -6.985  | -17.66 to 3.690   | No  | ns | 0.6351  |
| 20 vs. 35 | -0.7710 | -7.723 to 6.181   | No  | ns | >0.9999 |
| 20 vs. 36 | -17.78  | -35.08 to -0.4764 | Yes | *  | 0.0384  |
| 20 vs. 37 | -6.434  | -17.91 to 5.046   | No  | ns | 0.8609  |
| 20 vs. 40 | 0.4805  | -6.970 to 7.931   | No  | ns | >0.9999 |
| 20 vs. 41 | -9.571  | -22.99 to 3.848   | No  | ns | 0.4746  |
| 20 vs. 42 | -4.457  | -15.37 to 6.451   | No  | ns | 0.9952  |
| 20 vs. 45 | 2.897   | -8.486 to 14.28   | No  | ns | >0.9999 |
| 20 vs. 46 | -14.56  | -29.69 to 0.5779  | No  | ns | 0.0715  |
| 20 vs. 47 | -2.557  | -12.01 to 6.896   | No  | ns | >0.9999 |
| 20 vs. 50 | 2.353   | -5.297 to 10.00   | No  | ns | >0.9999 |
| 20 vs. 51 | -14.84  | -33.00 to 3.327   | No  | ns | 0.2410  |
| 20 vs. 52 | -0.8657 | -9.243 to 7.512   | No  | ns | >0.9999 |
| 20 vs. 55 | 3.692   | -4.513 to 11.90   | No  | ns | 0.9835  |
| 20 vs. 60 | 3.912   | -5.401 to 13.22   | No  | ns | 0.9931  |
| 21 vs. 22 | 11.93   | -3.854 to 27.71   | No  | ns | 0.3679  |
| 21 vs. 25 | 18.49   | 1.315 to 35.67    | Yes | *  | 0.0236  |
| 21 vs. 26 | 2.056   | -6.017 to 10.13   | No  | ns | >0.9999 |
| 21 vs. 27 | 13.52   | -3.039 to 30.09   | No  | ns | 0.2416  |
| 21 vs. 30 | 19.64   | 3.684 to 35.59    | Yes | ** | 0.0048  |
| 21 vs. 31 | 0.4074  | -9.851 to 10.67   | No  | ns | >0.9999 |
| 21 vs. 32 | 11.89   | -4.856 to 28.64   | No  | ns | 0.4830  |

|           |          |                 |     |      |         |
|-----------|----------|-----------------|-----|------|---------|
| 21 vs. 35 | 18.11    | 2.562 to 33.65  | Yes | **   | 0.0096  |
| 21 vs. 36 | 1.097    | -8.789 to 10.98 | No  | ns   | >0.9999 |
| 21 vs. 37 | 12.44    | -8.193 to 33.08 | No  | ns   | 0.7688  |
| 21 vs. 40 | 19.36    | 4.209 to 34.51  | Yes | **   | 0.0029  |
| 21 vs. 41 | 9.307    | -3.499 to 22.11 | No  | ns   | 0.4395  |
| 21 vs. 42 | 14.42    | -2.549 to 31.39 | No  | ns   | 0.1872  |
| 21 vs. 45 | 21.78    | 5.204 to 38.35  | Yes | **   | 0.0019  |
| 21 vs. 46 | 4.320    | -6.654 to 15.30 | No  | ns   | 0.9972  |
| 21 vs. 47 | 16.32    | 1.682 to 30.96  | Yes | *    | 0.0160  |
| 21 vs. 50 | 21.23    | 6.551 to 35.91  | Yes | ***  | 0.0005  |
| 21 vs. 51 | 4.041    | -7.445 to 15.53 | No  | ns   | 0.9995  |
| 21 vs. 52 | 18.01    | 3.408 to 32.62  | Yes | **   | 0.0046  |
| 21 vs. 55 | 22.57    | 8.616 to 36.53  | Yes | **** | <0.0001 |
| 21 vs. 60 | 22.79    | 5.750 to 39.83  | Yes | **   | 0.0015  |
| 22 vs. 25 | 6.564    | -4.245 to 17.37 | No  | ns   | 0.7584  |
| 22 vs. 26 | -9.870   | -24.78 to 5.039 | No  | ns   | 0.6142  |
| 22 vs. 27 | 1.599    | -11.11 to 14.30 | No  | ns   | >0.9999 |
| 22 vs. 30 | 7.711    | -4.455 to 19.88 | No  | ns   | 0.6904  |
| 22 vs. 31 | -11.52   | -29.12 to 6.087 | No  | ns   | 0.6354  |
| 22 vs. 32 | -0.03298 | -13.43 to 13.37 | No  | ns   | >0.9999 |
| 22 vs. 35 | 6.181    | -2.877 to 15.24 | No  | ns   | 0.5581  |
| 22 vs. 36 | -10.83   | -28.13 to 6.475 | No  | ns   | 0.7115  |
| 22 vs. 37 | 0.5183   | -9.526 to 10.56 | No  | ns   | >0.9999 |
| 22 vs. 40 | 7.432    | -2.731 to 17.60 | No  | ns   | 0.4279  |
| 22 vs. 41 | -2.619   | -17.25 to 12.01 | No  | ns   | >0.9999 |
| 22 vs. 42 | 2.495    | -8.274 to 13.26 | No  | ns   | >0.9999 |
| 22 vs. 45 | 9.849    | -3.395 to 23.09 | No  | ns   | 0.3971  |
| 22 vs. 46 | -7.606   | -22.78 to 7.572 | No  | ns   | 0.9473  |
| 22 vs. 47 | 4.395    | -4.945 to 13.74 | No  | ns   | 0.9726  |
| 22 vs. 50 | 9.305    | -1.446 to 20.05 | No  | ns   | 0.1650  |
| 22 vs. 51 | -7.885   | -25.90 to 10.13 | No  | ns   | 0.9883  |

|           |         |                   |     |    |         |
|-----------|---------|-------------------|-----|----|---------|
| 22 vs. 52 | 6.086   | -4.626 to 16.80   | No  | ns | 0.8459  |
| 22 vs. 55 | 10.64   | -0.7919 to 22.08  | No  | ns | 0.0947  |
| 22 vs. 60 | 10.86   | -0.3618 to 22.09  | No  | ns | 0.0677  |
| 25 vs. 26 | -16.43  | -32.38 to -0.4833 | Yes | *  | 0.0373  |
| 25 vs. 27 | -4.965  | -11.92 to 1.989   | No  | ns | 0.4728  |
| 25 vs. 30 | 1.147   | -9.585 to 11.88   | No  | ns | >0.9999 |
| 25 vs. 31 | -18.08  | -35.32 to -0.8507 | Yes | *  | 0.0310  |
| 25 vs. 32 | -6.597  | -17.59 to 4.396   | No  | ns | 0.7757  |
| 25 vs. 35 | -0.3834 | -6.611 to 5.844   | No  | ns | >0.9999 |
| 25 vs. 36 | -17.39  | -36.11 to 1.327   | No  | ns | 0.0960  |
| 25 vs. 37 | -6.046  | -17.39 to 5.294   | No  | ns | 0.9071  |
| 25 vs. 40 | 0.8681  | -6.479 to 8.215   | No  | ns | >0.9999 |
| 25 vs. 41 | -9.183  | -22.96 to 4.598   | No  | ns | 0.6022  |
| 25 vs. 42 | -4.070  | -12.90 to 4.758   | No  | ns | 0.9782  |
| 25 vs. 45 | 3.285   | -8.619 to 15.19   | No  | ns | >0.9999 |
| 25 vs. 46 | -14.17  | -30.49 to 2.146   | No  | ns | 0.1610  |
| 25 vs. 47 | -2.169  | -13.95 to 9.607   | No  | ns | >0.9999 |
| 25 vs. 50 | 2.740   | -3.993 to 9.474   | No  | ns | 0.9955  |
| 25 vs. 51 | -14.45  | -35.35 to 6.456   | No  | ns | 0.5340  |
| 25 vs. 52 | -0.4782 | -11.54 to 10.58   | No  | ns | >0.9999 |
| 25 vs. 55 | 4.080   | -5.713 to 13.87   | No  | ns | 0.9938  |
| 25 vs. 60 | 4.299   | -2.523 to 11.12   | No  | ns | 0.7002  |
| 26 vs. 27 | 11.47   | -3.205 to 26.14   | No  | ns | 0.3100  |
| 26 vs. 30 | 17.58   | 2.464 to 32.70    | Yes | ** | 0.0097  |
| 26 vs. 31 | -1.649  | -10.52 to 7.223   | No  | ns | >0.9999 |
| 26 vs. 32 | 9.837   | -3.992 to 23.67   | No  | ns | 0.4797  |
| 26 vs. 35 | 16.05   | 2.084 to 30.02    | Yes | *  | 0.0112  |
| 26 vs. 36 | -0.9590 | -11.85 to 9.934   | No  | ns | >0.9999 |
| 26 vs. 37 | 10.39   | -7.951 to 28.73   | No  | ns | 0.8493  |
| 26 vs. 40 | 17.30   | 3.417 to 31.19    | Yes | ** | 0.0040  |
| 26 vs. 41 | 7.251   | -4.289 to 18.79   | No  | ns | 0.7049  |

|           |        |                  |     |     |         |
|-----------|--------|------------------|-----|-----|---------|
| 26 vs. 42 | 12.36  | -3.251 to 27.98  | No  | ns  | 0.2889  |
| 26 vs. 45 | 19.72  | 3.306 to 36.13   | Yes | **  | 0.0065  |
| 26 vs. 46 | 2.264  | -8.757 to 13.29  | No  | ns  | >0.9999 |
| 26 vs. 47 | 14.26  | 0.3328 to 28.20  | Yes | *   | 0.0397  |
| 26 vs. 50 | 19.17  | 5.967 to 32.38   | Yes | *** | 0.0004  |
| 26 vs. 51 | 1.985  | -7.708 to 11.68  | No  | ns  | >0.9999 |
| 26 vs. 52 | 15.96  | 2.358 to 29.55   | Yes | **  | 0.0087  |
| 26 vs. 55 | 20.51  | 5.654 to 35.37   | Yes | *** | 0.0009  |
| 26 vs. 60 | 20.73  | 4.283 to 37.18   | Yes | **  | 0.0035  |
| 27 vs. 30 | 6.113  | -6.489 to 18.71  | No  | ns  | 0.9620  |
| 27 vs. 31 | -13.12 | -28.93 to 2.690  | No  | ns  | 0.2186  |
| 27 vs. 32 | -1.632 | -11.19 to 7.926  | No  | ns  | >0.9999 |
| 27 vs. 35 | 4.582  | -3.904 to 13.07  | No  | ns  | 0.8966  |
| 27 vs. 36 | -12.43 | -30.51 to 5.660  | No  | ns  | 0.5452  |
| 27 vs. 37 | -1.081 | -15.39 to 13.23  | No  | ns  | >0.9999 |
| 27 vs. 40 | 5.834  | -2.809 to 14.48  | No  | ns  | 0.5785  |
| 27 vs. 41 | -4.218 | -17.44 to 9.006  | No  | ns  | >0.9999 |
| 27 vs. 42 | 0.8958 | -8.376 to 10.17  | No  | ns  | >0.9999 |
| 27 vs. 45 | 8.250  | -4.337 to 20.84  | No  | ns  | 0.6322  |
| 27 vs. 46 | -9.205 | -23.97 to 5.564  | No  | ns  | 0.7181  |
| 27 vs. 47 | 2.796  | -10.37 to 15.97  | No  | ns  | >0.9999 |
| 27 vs. 50 | 7.706  | -1.370 to 16.78  | No  | ns  | 0.1883  |
| 27 vs. 51 | -9.484 | -28.95 to 9.986  | No  | ns  | 0.9603  |
| 27 vs. 52 | 4.487  | -8.198 to 17.17  | No  | ns  | 0.9995  |
| 27 vs. 55 | 9.045  | -1.447 to 19.54  | No  | ns  | 0.1697  |
| 27 vs. 60 | 9.265  | 0.1176 to 18.41  | Yes | *   | 0.0442  |
| 30 vs. 31 | -19.23 | -34.06 to -4.399 | Yes | **  | 0.0023  |
| 30 vs. 32 | -7.744 | -23.29 to 7.802  | No  | ns  | 0.9503  |
| 30 vs. 35 | -1.531 | -10.09 to 7.025  | No  | ns  | >0.9999 |
| 30 vs. 36 | -18.54 | -34.02 to -3.062 | Yes | **  | 0.0068  |
| 30 vs. 37 | -7.193 | -18.62 to 4.232  | No  | ns  | 0.7017  |

|           |         |                  |     |      |         |
|-----------|---------|------------------|-----|------|---------|
| 30 vs. 40 | -0.2791 | -6.580 to 6.021  | No  | ns   | >0.9999 |
| 30 vs. 41 | -10.33  | -22.30 to 1.636  | No  | ns   | 0.1681  |
| 30 vs. 42 | -5.217  | -15.19 to 4.753  | No  | ns   | 0.9211  |
| 30 vs. 45 | 2.138   | -6.668 to 10.94  | No  | ns   | >0.9999 |
| 30 vs. 46 | -15.32  | -31.47 to 0.8320 | No  | ns   | 0.0807  |
| 30 vs. 47 | -3.316  | -15.28 to 8.651  | No  | ns   | >0.9999 |
| 30 vs. 50 | 1.593   | -6.524 to 9.710  | No  | ns   | >0.9999 |
| 30 vs. 51 | -15.60  | -33.31 to 2.118  | No  | ns   | 0.1460  |
| 30 vs. 52 | -1.625  | -9.053 to 5.803  | No  | ns   | >0.9999 |
| 30 vs. 55 | 2.933   | -4.786 to 10.65  | No  | ns   | 0.9983  |
| 30 vs. 60 | 3.152   | -5.658 to 11.96  | No  | ns   | 0.9994  |
| 31 vs. 32 | 11.49   | -4.118 to 27.09  | No  | ns   | 0.4158  |
| 31 vs. 35 | 17.70   | 1.825 to 33.57   | Yes | *    | 0.0160  |
| 31 vs. 36 | 0.6900  | -8.674 to 10.05  | No  | ns   | >0.9999 |
| 31 vs. 37 | 12.04   | -7.606 to 31.68  | No  | ns   | 0.7448  |
| 31 vs. 40 | 18.95   | 4.468 to 33.43   | Yes | **   | 0.0021  |
| 31 vs. 41 | 8.900   | -3.349 to 21.15  | No  | ns   | 0.4399  |
| 31 vs. 42 | 14.01   | -1.671 to 29.70  | No  | ns   | 0.1309  |
| 31 vs. 45 | 21.37   | 4.581 to 38.15   | Yes | **   | 0.0030  |
| 31 vs. 46 | 3.913   | -6.447 to 14.27  | No  | ns   | 0.9985  |
| 31 vs. 47 | 15.91   | 1.520 to 30.31   | Yes | *    | 0.0176  |
| 31 vs. 50 | 20.82   | 6.505 to 35.14   | Yes | ***  | 0.0004  |
| 31 vs. 51 | 3.634   | -6.783 to 14.05  | No  | ns   | 0.9996  |
| 31 vs. 52 | 17.60   | 3.719 to 31.49   | Yes | **   | 0.0032  |
| 31 vs. 55 | 22.16   | 8.223 to 36.10   | Yes | **** | <0.0001 |
| 31 vs. 60 | 22.38   | 5.045 to 39.72   | Yes | **   | 0.0025  |
| 32 vs. 35 | 6.214   | -3.843 to 16.27  | No  | ns   | 0.7320  |
| 32 vs. 36 | -10.80  | -29.31 to 7.717  | No  | ns   | 0.8145  |
| 32 vs. 37 | 0.5512  | -13.89 to 14.99  | No  | ns   | >0.9999 |
| 32 vs. 40 | 7.465   | -4.249 to 19.18  | No  | ns   | 0.6813  |
| 32 vs. 41 | -2.586  | -16.80 to 11.63  | No  | ns   | >0.9999 |

|           |          |                   |     |    |         |
|-----------|----------|-------------------|-----|----|---------|
| 32 vs. 42 | 2.528    | -10.13 to 15.19   | No  | ns | >0.9999 |
| 32 vs. 45 | 9.882    | -5.534 to 25.30   | No  | ns | 0.6713  |
| 32 vs. 46 | -7.573   | -21.80 to 6.657   | No  | ns | 0.9085  |
| 32 vs. 47 | 4.428    | -7.778 to 16.63   | No  | ns | 0.9992  |
| 32 vs. 50 | 9.338    | -1.585 to 20.26   | No  | ns | 0.1798  |
| 32 vs. 51 | -7.852   | -25.79 to 10.08   | No  | ns | 0.9882  |
| 32 vs. 52 | 6.119    | -7.449 to 19.69   | No  | ns | 0.9831  |
| 32 vs. 55 | 10.68    | -2.443 to 23.80   | No  | ns | 0.2465  |
| 32 vs. 60 | 10.90    | -2.547 to 24.34   | No  | ns | 0.2525  |
| 35 vs. 36 | -17.01   | -33.75 to -0.2725 | Yes | *  | 0.0428  |
| 35 vs. 37 | -5.663   | -15.50 to 4.172   | No  | ns | 0.8302  |
| 35 vs. 40 | 1.252    | -3.844 to 6.347   | No  | ns | >0.9999 |
| 35 vs. 41 | -8.800   | -21.26 to 3.658   | No  | ns | 0.4929  |
| 35 vs. 42 | -3.686   | -12.02 to 4.647   | No  | ns | 0.9866  |
| 35 vs. 45 | 3.668    | -6.387 to 13.72   | No  | ns | 0.9991  |
| 35 vs. 46 | -13.79   | -28.92 to 1.342   | No  | ns | 0.1123  |
| 35 vs. 47 | -1.786   | -11.63 to 8.058   | No  | ns | >0.9999 |
| 35 vs. 50 | 3.124    | -2.069 to 8.317   | No  | ns | 0.7723  |
| 35 vs. 51 | -14.07   | -31.84 to 3.710   | No  | ns | 0.2899  |
| 35 vs. 52 | -0.09472 | -9.623 to 9.434   | No  | ns | >0.9999 |
| 35 vs. 55 | 4.463    | -3.755 to 12.68   | No  | ns | 0.8915  |
| 35 vs. 60 | 4.683    | -2.801 to 12.17   | No  | ns | 0.7117  |
| 36 vs. 37 | 11.35    | -8.123 to 30.82   | No  | ns | 0.8153  |
| 36 vs. 40 | 18.26    | 2.212 to 34.31    | Yes | *  | 0.0126  |
| 36 vs. 41 | 8.210    | -3.764 to 20.18   | No  | ns | 0.5492  |
| 36 vs. 42 | 13.32    | -3.992 to 30.64   | No  | ns | 0.3365  |
| 36 vs. 45 | 20.68    | 3.865 to 37.49    | Yes | ** | 0.0048  |
| 36 vs. 46 | 3.223    | -6.954 to 13.40   | No  | ns | >0.9999 |
| 36 vs. 47 | 15.22    | 0.6676 to 29.78   | Yes | *  | 0.0321  |
| 36 vs. 50 | 20.13    | 3.974 to 36.29    | Yes | ** | 0.0040  |
| 36 vs. 51 | 2.944    | -6.795 to 12.68   | No  | ns | >0.9999 |

|           |        |                   |     |     |         |
|-----------|--------|-------------------|-----|-----|---------|
| 36 vs. 52 | 16.91  | 2.456 to 31.37    | Yes | **  | 0.0091  |
| 36 vs. 55 | 21.47  | 6.168 to 36.78    | Yes | *** | 0.0007  |
| 36 vs. 60 | 21.69  | 3.752 to 39.63    | Yes | **  | 0.0060  |
| 37 vs. 40 | 6.914  | -3.984 to 17.81   | No  | ns  | 0.6889  |
| 37 vs. 41 | -3.137 | -19.17 to 12.90   | No  | ns  | >0.9999 |
| 37 vs. 42 | 1.976  | -9.070 to 13.02   | No  | ns  | >0.9999 |
| 37 vs. 45 | 9.331  | -5.601 to 24.26   | No  | ns  | 0.7139  |
| 37 vs. 46 | -8.124 | -26.49 to 10.24   | No  | ns  | 0.9866  |
| 37 vs. 47 | 3.877  | -6.917 to 14.67   | No  | ns  | 0.9993  |
| 37 vs. 50 | 8.786  | -3.328 to 20.90   | No  | ns  | 0.4432  |
| 37 vs. 51 | -8.403 | -29.74 to 12.94   | No  | ns  | 0.9972  |
| 37 vs. 52 | 5.568  | -5.000 to 16.14   | No  | ns  | 0.9161  |
| 37 vs. 55 | 10.13  | -4.003 to 24.26   | No  | ns  | 0.4657  |
| 37 vs. 60 | 10.35  | -1.321 to 22.01   | No  | ns  | 0.1385  |
| 40 vs. 41 | -10.05 | -21.84 to 1.736   | No  | ns  | 0.1829  |
| 40 vs. 42 | -4.938 | -13.05 to 3.171   | No  | ns  | 0.7543  |
| 40 vs. 45 | 2.417  | -5.873 to 10.71   | No  | ns  | >0.9999 |
| 40 vs. 46 | -15.04 | -29.65 to -0.4254 | Yes | *   | 0.0378  |
| 40 vs. 47 | -3.037 | -13.62 to 7.547   | No  | ns  | >0.9999 |
| 40 vs. 50 | 1.872  | -4.007 to 7.751   | No  | ns  | >0.9999 |
| 40 vs. 51 | -15.32 | -32.49 to 1.857   | No  | ns  | 0.1326  |
| 40 vs. 52 | -1.346 | -9.633 to 6.940   | No  | ns  | >0.9999 |
| 40 vs. 55 | 3.212  | -3.073 to 9.497   | No  | ns  | 0.9364  |
| 40 vs. 60 | 3.431  | -4.351 to 11.21   | No  | ns  | 0.9871  |
| 41 vs. 42 | 5.114  | -8.224 to 18.45   | No  | ns  | 0.9981  |
| 41 vs. 45 | 12.47  | 1.741 to 23.20    | Yes | **  | 0.0098  |
| 41 vs. 46 | -4.987 | -15.83 to 5.858   | No  | ns  | 0.9788  |
| 41 vs. 47 | 7.014  | -6.794 to 20.82   | No  | ns  | 0.9400  |
| 41 vs. 50 | 11.92  | -0.6564 to 24.50  | No  | ns  | 0.0812  |
| 41 vs. 51 | -5.266 | -18.54 to 8.008   | No  | ns  | 0.9968  |
| 41 vs. 52 | 8.705  | -4.108 to 21.52   | No  | ns  | 0.5664  |



|           |         |                  |     |    |         |
|-----------|---------|------------------|-----|----|---------|
| 41 vs. 55 | 13.26   | 2.002 to 24.53   | Yes | ** | 0.0083  |
| 41 vs. 60 | 13.48   | -0.5730 to 27.54 | No  | ns | 0.0732  |
| 42 vs. 45 | 7.354   | -4.761 to 19.47  | No  | ns | 0.7590  |
| 42 vs. 46 | -10.10  | -25.44 to 5.236  | No  | ns | 0.6236  |
| 42 vs. 47 | 1.900   | -10.38 to 14.18  | No  | ns | >0.9999 |
| 42 vs. 50 | 6.810   | -2.280 to 15.90  | No  | ns | 0.3836  |
| 42 vs. 51 | -10.38  | -30.23 to 9.472  | No  | ns | 0.9216  |
| 42 vs. 52 | 3.592   | -6.857 to 14.04  | No  | ns | 0.9997  |
| 42 vs. 55 | 8.150   | -1.535 to 17.83  | No  | ns | 0.1998  |
| 42 vs. 60 | 8.369   | -0.2117 to 16.95 | No  | ns | 0.0631  |
| 45 vs. 46 | -17.45  | -32.42 to -2.492 | Yes | ** | 0.0094  |
| 45 vs. 47 | -5.454  | -19.52 to 8.613  | No  | ns | 0.9977  |
| 45 vs. 50 | -0.5445 | -10.50 to 9.407  | No  | ns | >0.9999 |
| 45 vs. 51 | -17.73  | -35.90 to 0.4288 | No  | ns | 0.0625  |
| 45 vs. 52 | -3.763  | -15.97 to 8.440  | No  | ns | >0.9999 |
| 45 vs. 55 | 0.7952  | -6.855 to 8.446  | No  | ns | >0.9999 |
| 45 vs. 60 | 1.014   | -8.762 to 10.79  | No  | ns | >0.9999 |
| 46 vs. 47 | 12.00   | -1.467 to 25.47  | No  | ns | 0.1335  |
| 46 vs. 50 | 16.91   | 2.299 to 31.52   | Yes | *  | 0.0103  |
| 46 vs. 51 | -0.2790 | -12.25 to 11.69  | No  | ns | >0.9999 |
| 46 vs. 52 | 13.69   | -0.4608 to 27.84 | No  | ns | 0.0679  |
| 46 vs. 55 | 18.25   | 4.713 to 31.79   | Yes | ** | 0.0013  |
| 46 vs. 60 | 18.47   | 2.122 to 34.82   | Yes | *  | 0.0137  |
| 47 vs. 50 | 4.910   | -5.381 to 15.20  | No  | ns | 0.9681  |
| 47 vs. 51 | -12.28  | -28.48 to 3.924  | No  | ns | 0.3631  |
| 47 vs. 52 | 1.691   | -6.280 to 9.662  | No  | ns | >0.9999 |
| 47 vs. 55 | 6.249   | -5.203 to 17.70  | No  | ns | 0.8872  |
| 47 vs. 60 | 6.468   | -5.858 to 18.79  | No  | ns | 0.9191  |
| 50 vs. 51 | -17.19  | -34.95 to 0.5670 | No  | ns | 0.0675  |
| 50 vs. 52 | -3.218  | -12.62 to 6.178  | No  | ns | 0.9997  |
| 50 vs. 55 | 1.340   | -6.532 to 9.211  | No  | ns | >0.9999 |

|           |        |                 |     |    |         |
|-----------|--------|-----------------|-----|----|---------|
| 50 vs. 60 | 1.559  | -4.889 to 8.006 | No  | ns | >0.9999 |
| 51 vs. 52 | 13.97  | -2.710 to 30.65 | No  | ns | 0.2060  |
| 51 vs. 55 | 18.53  | 1.646 to 35.41  | Yes | *  | 0.0191  |
| 51 vs. 60 | 18.75  | -2.364 to 39.86 | No  | ns | 0.1370  |
| 52 vs. 55 | 4.558  | -4.857 to 13.97 | No  | ns | 0.9628  |
| 52 vs. 60 | 4.777  | -6.066 to 15.62 | No  | ns | 0.9872  |
| 55 vs. 60 | 0.2192 | -9.243 to 9.681 | No  | ns | >0.9999 |

**Table S2. The statistical significance for comparison of VCL between different tracking periods for non-exposed sperm cells (n=30, at each tracking period).** Statistical significance was determined using ordinary one-way ANOVA matched values with Tukey's multiple-comparison test (\* P ≤ 0.05, \*\* P ≤ 0.01, \*\*\* P ≤ 0.001, \*\*\*\* P ≤ 0.0001, and ns denotes not significant).

| Tukey's multiple comparisons test | Mean Diff. | 95.00% CI of diff. | Below threshold? | Summary | Adjusted P Value |
|-----------------------------------|------------|--------------------|------------------|---------|------------------|
| 0 vs. 5                           | 4.131      | -4.477 to 12.74    | No               | ns      | 0.8675           |
| 0 vs. 10                          | 3.836      | -2.533 to 10.21    | No               | ns      | 0.6193           |
| 0 vs. 15                          | 4.843      | -3.386 to 13.07    | No               | ns      | 0.6510           |
| 0 vs. 20                          | 10.66      | 1.647 to 19.67     | Yes              | *       | 0.0102           |
| 0 vs. 25                          | 8.513      | 0.7534 to 16.27    | Yes              | *       | 0.0219           |
| 0 vs. 30                          | 11.64      | 1.850 to 21.43     | Yes              | **      | 0.0096           |
| 0 vs. 35                          | 10.47      | -0.1897 to 21.12   | No               | ns      | 0.0578           |
| 0 vs. 40                          | 12.47      | 2.377 to 22.56     | Yes              | **      | 0.0063           |
| 0 vs. 45                          | 12.80      | 2.300 to 23.30     | Yes              | **      | 0.0073           |
| 0 vs. 50                          | 14.06      | 4.601 to 23.53     | Yes              | ***     | 0.0006           |
| 0 vs. 55                          | 14.45      | 3.299 to 25.60     | Yes              | **      | 0.0036           |
| 0 vs. 60                          | 16.41      | 5.660 to 27.16     | Yes              | ***     | 0.0004           |
| 5 vs. 10                          | -0.2947    | -6.416 to 5.827    | No               | ns      | >0.9999          |
| 5 vs. 15                          | 0.7118     | -5.703 to 7.127    | No               | ns      | >0.9999          |
| 5 vs. 20                          | 6.528      | 1.648 to 11.41     | Yes              | **      | 0.0024           |
| 5 vs. 25                          | 4.382      | -1.783 to 10.55    | No               | ns      | 0.3765           |
| 5 vs. 30                          | 7.508      | 0.05269 to 14.96   | Yes              | *       | 0.0472           |
| 5 vs. 35                          | 6.334      | -3.251 to 15.92    | No               | ns      | 0.4841           |
| 5 vs. 40                          | 8.336      | 0.2309 to 16.44    | Yes              | *       | 0.0395           |
| 5 vs. 45                          | 8.668      | -0.3679 to 17.70   | No               | ns      | 0.0695           |
| 5 vs. 50                          | 9.933      | 2.436 to 17.43     | Yes              | **      | 0.0027           |
| 5 vs. 55                          | 10.32      | 1.742 to 18.89     | Yes              | **      | 0.0085           |
| 5 vs. 60                          | 12.28      | 3.785 to 20.77     | Yes              | ***     | 0.0009           |
| 10 vs. 15                         | 1.006      | -4.000 to 6.013    | No               | ns      | >0.9999          |
| 10 vs. 20                         | 6.823      | 0.2223 to 13.42    | Yes              | *       | 0.0378           |
| 10 vs. 25                         | 4.676      | -1.530 to 10.88    | No               | ns      | 0.2957           |

|           |         |                   |     |      |         |
|-----------|---------|-------------------|-----|------|---------|
| 10 vs. 30 | 7.802   | -0.9974 to 16.60  | No  | ns   | 0.1213  |
| 10 vs. 35 | 6.629   | -3.389 to 16.65   | No  | ns   | 0.4822  |
| 10 vs. 40 | 8.630   | -0.4544 to 17.71  | No  | ns   | 0.0748  |
| 10 vs. 45 | 8.963   | 0.3023 to 17.62   | Yes | *    | 0.0374  |
| 10 vs. 50 | 10.23   | 2.186 to 18.27    | Yes | **   | 0.0045  |
| 10 vs. 55 | 10.61   | 2.244 to 18.98    | Yes | **   | 0.0046  |
| 10 vs. 60 | 12.57   | 4.219 to 20.93    | Yes | ***  | 0.0005  |
| 15 vs. 20 | 5.816   | -0.03055 to 11.66 | No  | ns   | 0.0522  |
| 15 vs. 25 | 3.670   | -0.4386 to 7.778  | No  | ns   | 0.1155  |
| 15 vs. 30 | 6.796   | -0.2702 to 13.86  | No  | ns   | 0.0681  |
| 15 vs. 35 | 5.622   | -2.759 to 14.00   | No  | ns   | 0.4616  |
| 15 vs. 40 | 7.624   | -0.2540 to 15.50  | No  | ns   | 0.0650  |
| 15 vs. 45 | 7.956   | 1.561 to 14.35    | Yes | **   | 0.0058  |
| 15 vs. 50 | 9.221   | 3.079 to 15.36    | Yes | ***  | 0.0005  |
| 15 vs. 55 | 9.606   | 3.107 to 16.10    | Yes | ***  | 0.0006  |
| 15 vs. 60 | 11.57   | 4.991 to 18.15    | Yes | **** | <0.0001 |
| 20 vs. 25 | -2.146  | -6.446 to 2.153   | No  | ns   | 0.8357  |
| 20 vs. 30 | 0.9797  | -5.431 to 7.391   | No  | ns   | >0.9999 |
| 20 vs. 35 | -0.1937 | -9.632 to 9.245   | No  | ns   | >0.9999 |
| 20 vs. 40 | 1.808   | -5.507 to 9.122   | No  | ns   | 0.9993  |
| 20 vs. 45 | 2.140   | -5.323 to 9.603   | No  | ns   | 0.9972  |
| 20 vs. 50 | 3.405   | -2.530 to 9.340   | No  | ns   | 0.6848  |
| 20 vs. 55 | 3.790   | -3.501 to 11.08   | No  | ns   | 0.7981  |
| 20 vs. 60 | 5.752   | -0.2752 to 11.78  | No  | ns   | 0.0723  |
| 25 vs. 30 | 3.126   | -2.092 to 8.344   | No  | ns   | 0.6268  |
| 25 vs. 35 | 1.953   | -5.144 to 9.049   | No  | ns   | 0.9981  |
| 25 vs. 40 | 3.954   | -1.727 to 9.635   | No  | ns   | 0.4071  |
| 25 vs. 45 | 4.287   | -1.072 to 9.645   | No  | ns   | 0.2214  |
| 25 vs. 50 | 5.551   | 0.9382 to 10.16   | Yes | **   | 0.0084  |
| 25 vs. 55 | 5.936   | 0.2033 to 11.67   | Yes | *    | 0.0372  |
| 25 vs. 60 | 7.898   | 1.999 to 13.80    | Yes | **   | 0.0024  |

|           |        |                 |    |    |         |
|-----------|--------|-----------------|----|----|---------|
| 30 vs. 35 | -1.173 | -7.281 to 4.934 | No | ns | >0.9999 |
| 30 vs. 40 | 0.8280 | -5.183 to 6.839 | No | ns | >0.9999 |
| 30 vs. 45 | 1.160  | -5.072 to 7.392 | No | ns | >0.9999 |
| 30 vs. 50 | 2.425  | -3.434 to 8.284 | No | ns | 0.9471  |
| 30 vs. 55 | 2.810  | -4.251 to 9.871 | No | ns | 0.9597  |
| 30 vs. 60 | 4.772  | -3.296 to 12.84 | No | ns | 0.6443  |
| 35 vs. 40 | 2.001  | -3.914 to 7.917 | No | ns | 0.9883  |
| 35 vs. 45 | 2.334  | -3.312 to 7.979 | No | ns | 0.9475  |
| 35 vs. 50 | 3.598  | -2.736 to 9.933 | No | ns | 0.6974  |
| 35 vs. 55 | 3.984  | -3.486 to 11.45 | No | ns | 0.7714  |
| 35 vs. 60 | 5.946  | -3.032 to 14.92 | No | ns | 0.4808  |
| 40 vs. 45 | 0.3325 | -5.278 to 5.943 | No | ns | >0.9999 |
| 40 vs. 50 | 1.597  | -3.127 to 6.321 | No | ns | 0.9884  |
| 40 vs. 55 | 1.982  | -3.635 to 7.599 | No | ns | 0.9836  |
| 40 vs. 60 | 3.944  | -2.864 to 10.75 | No | ns | 0.6721  |
| 45 vs. 50 | 1.265  | -3.037 to 5.566 | No | ns | 0.9965  |
| 45 vs. 55 | 1.650  | -2.529 to 5.828 | No | ns | 0.9619  |
| 45 vs. 60 | 3.612  | -1.910 to 9.133 | No | ns | 0.4993  |
| 50 vs. 55 | 0.3851 | -3.874 to 4.644 | No | ns | >0.9999 |
| 50 vs. 60 | 2.347  | -2.356 to 7.051 | No | ns | 0.8360  |
| 55 vs. 60 | 1.962  | -2.743 to 6.667 | No | ns | 0.9443  |

**Table S3. The statistical significance for comparison of VCL between different tracking periods for sperm cells exposed to 10-minute repetition time pulsed ultrasound (n=30, at each tracking period).** Statistical significance was determined using ordinary one-way ANOVA matched values with Tukey's multiple-comparison test (\*  $P \leq 0.05$ , \*\*  $P \leq 0.01$ , \*\*\*  $P \leq 0.001$ , \*\*\*\*  $P \leq 0.0001$ , and ns denotes not significant).

| Tukey's multiple comparisons test | Mean Diff. | 95.00% CI of diff. | Below threshold? | Summary | Adjusted P Value |
|-----------------------------------|------------|--------------------|------------------|---------|------------------|
| 0 vs. 5                           | 2.918      | -3.860 to 9.697    | No               | ns      | 0.9782           |
| 0 vs. 10                          | 2.548      | -3.706 to 8.802    | No               | ns      | 0.9877           |
| 0 vs. 11                          | -27.02     | -45.09 to -8.950   | Yes              | ***     | 0.0003           |
| 0 vs. 12                          | -7.853     | -17.51 to 1.808    | No               | ns      | 0.2314           |
| 0 vs. 15                          | 0.9461     | -7.295 to 9.187    | No               | ns      | >0.9999          |
| 0 vs. 20                          | 4.866      | -6.484 to 16.22    | No               | ns      | 0.9791           |
| 0 vs. 21                          | -26.52     | -43.23 to -9.809   | Yes              | ***     | 0.0001           |
| 0 vs. 22                          | -3.617     | -14.43 to 7.199    | No               | ns      | 0.9989           |
| 0 vs. 25                          | 2.178      | -7.604 to 11.96    | No               | ns      | >0.9999          |
| 0 vs. 30                          | 4.730      | -6.032 to 15.49    | No               | ns      | 0.9733           |
| 0 vs. 31                          | -19.29     | -34.39 to -4.180   | Yes              | **      | 0.0033           |
| 0 vs. 32                          | 2.064      | -6.914 to 11.04    | No               | ns      | >0.9999          |
| 0 vs. 35                          | 4.928      | -6.676 to 16.53    | No               | ns      | 0.9810           |
| 0 vs. 40                          | 9.817      | 0.9677 to 18.67    | Yes              | *       | 0.0179           |
| 0 vs. 41                          | -16.93     | -33.38 to -0.4722  | Yes              | *       | 0.0384           |
| 0 vs. 42                          | 4.830      | -4.245 to 13.91    | No               | ns      | 0.8676           |
| 0 vs. 45                          | 8.343      | 0.1975 to 16.49    | Yes              | *       | 0.0401           |
| 0 vs. 50                          | 8.849      | 0.1113 to 17.59    | Yes              | *       | 0.0445           |
| 0 vs. 51                          | -14.48     | -29.10 to 0.1415   | No               | ns      | 0.0546           |
| 0 vs. 52                          | 1.185      | -9.020 to 11.39    | No               | ns      | >0.9999          |
| 0 vs. 55                          | 5.815      | -2.415 to 14.05    | No               | ns      | 0.4529           |
| 0 vs. 60                          | 7.040      | -0.7824 to 14.86   | No               | ns      | 0.1187           |
| 5 vs. 10                          | -0.3700    | -6.533 to 5.793    | No               | ns      | >0.9999          |
| 5 vs. 11                          | -29.94     | -49.66 to -10.22   | Yes              | ***     | 0.0003           |
| 5 vs. 12                          | -10.77     | -19.48 to -2.059   | Yes              | **      | 0.0050           |

|           |         |                   |     |      |         |
|-----------|---------|-------------------|-----|------|---------|
| 5 vs. 15  | -1.972  | -9.050 to 5.105   | No  | ns   | >0.9999 |
| 5 vs. 20  | 1.948   | -7.513 to 11.41   | No  | ns   | >0.9999 |
| 5 vs. 21  | -29.44  | -47.55 to -11.33  | Yes | **** | <0.0001 |
| 5 vs. 22  | -6.535  | -17.47 to 4.398   | No  | ns   | 0.7300  |
| 5 vs. 25  | -0.7409 | -11.06 to 9.577   | No  | ns   | >0.9999 |
| 5 vs. 30  | 1.811   | -7.505 to 11.13   | No  | ns   | >0.9999 |
| 5 vs. 31  | -22.20  | -37.98 to -6.432  | Yes | ***  | 0.0009  |
| 5 vs. 32  | -0.8544 | -10.35 to 8.642   | No  | ns   | >0.9999 |
| 5 vs. 35  | 2.009   | -7.914 to 11.93   | No  | ns   | >0.9999 |
| 5 vs. 40  | 6.899   | -0.7033 to 14.50  | No  | ns   | 0.1116  |
| 5 vs. 41  | -19.85  | -37.13 to -2.563  | Yes | *    | 0.0122  |
| 5 vs. 42  | 1.912   | -7.347 to 11.17   | No  | ns   | >0.9999 |
| 5 vs. 45  | 5.425   | -2.389 to 13.24   | No  | ns   | 0.4836  |
| 5 vs. 50  | 5.931   | -2.964 to 14.82   | No  | ns   | 0.5539  |
| 5 vs. 51  | -17.40  | -34.19 to -0.6091 | Yes | *    | 0.0358  |
| 5 vs. 52  | -1.734  | -12.52 to 9.057   | No  | ns   | >0.9999 |
| 5 vs. 55  | 2.897   | -6.028 to 11.82   | No  | ns   | 0.9993  |
| 5 vs. 60  | 4.121   | -3.665 to 11.91   | No  | ns   | 0.8726  |
| 10 vs. 11 | -29.57  | -49.98 to -9.154  | Yes | ***  | 0.0006  |
| 10 vs. 12 | -10.40  | -18.73 to -2.071  | Yes | **   | 0.0045  |
| 10 vs. 15 | -1.602  | -6.656 to 3.452   | No  | ns   | 0.9995  |
| 10 vs. 20 | 2.318   | -5.126 to 9.762   | No  | ns   | 0.9996  |
| 10 vs. 21 | -29.07  | -47.88 to -10.25  | Yes | ***  | 0.0002  |
| 10 vs. 22 | -6.165  | -15.10 to 2.767   | No  | ns   | 0.4937  |
| 10 vs. 25 | -0.3709 | -7.655 to 6.914   | No  | ns   | >0.9999 |
| 10 vs. 30 | 2.181   | -5.962 to 10.32   | No  | ns   | >0.9999 |
| 10 vs. 31 | -21.83  | -38.12 to -5.552  | Yes | **   | 0.0017  |
| 10 vs. 32 | -0.4844 | -8.392 to 7.423   | No  | ns   | >0.9999 |
| 10 vs. 35 | 2.379   | -7.426 to 12.18   | No  | ns   | >0.9999 |
| 10 vs. 40 | 7.269   | 0.3309 to 14.21   | Yes | *    | 0.0322  |
| 10 vs. 41 | -19.48  | -37.05 to -1.903  | Yes | *    | 0.0181  |

|           |        |                   |     |      |         |
|-----------|--------|-------------------|-----|------|---------|
| 10 vs. 42 | 2.282  | -6.053 to 10.62   | No  | ns   | >0.9999 |
| 10 vs. 45 | 5.795  | -1.724 to 13.31   | No  | ns   | 0.3087  |
| 10 vs. 50 | 6.301  | -2.095 to 14.70   | No  | ns   | 0.3510  |
| 10 vs. 51 | -17.03 | -33.73 to -0.3290 | Yes | *    | 0.0418  |
| 10 vs. 52 | -1.364 | -10.22 to 7.493   | No  | ns   | >0.9999 |
| 10 vs. 55 | 3.267  | -4.277 to 10.81   | No  | ns   | 0.9769  |
| 10 vs. 60 | 4.491  | -1.740 to 10.72   | No  | ns   | 0.4185  |
| 11 vs. 12 | 19.17  | -2.470 to 40.80   | No  | ns   | 0.1330  |
| 11 vs. 15 | 27.97  | 7.493 to 48.44    | Yes | **   | 0.0013  |
| 11 vs. 20 | 31.89  | 10.89 to 52.89    | Yes | ***  | 0.0003  |
| 11 vs. 21 | 0.5007 | -8.366 to 9.368   | No  | ns   | >0.9999 |
| 11 vs. 22 | 23.40  | 1.492 to 45.31    | Yes | *    | 0.0266  |
| 11 vs. 25 | 29.20  | 7.459 to 50.94    | Yes | **   | 0.0017  |
| 11 vs. 30 | 31.75  | 10.36 to 53.14    | Yes | ***  | 0.0004  |
| 11 vs. 31 | 7.734  | -5.719 to 21.19   | No  | ns   | 0.7828  |
| 11 vs. 32 | 29.08  | 8.426 to 49.74    | Yes | ***  | 0.0009  |
| 11 vs. 35 | 31.95  | 8.549 to 55.35    | Yes | **   | 0.0013  |
| 11 vs. 40 | 36.84  | 16.98 to 56.69    | Yes | **** | <0.0001 |
| 11 vs. 41 | 10.09  | -6.323 to 26.51   | No  | ns   | 0.6879  |
| 11 vs. 42 | 31.85  | 10.87 to 52.83    | Yes | ***  | 0.0003  |
| 11 vs. 45 | 35.36  | 14.66 to 56.07    | Yes | **** | <0.0001 |
| 11 vs. 50 | 35.87  | 16.46 to 55.28    | Yes | **** | <0.0001 |
| 11 vs. 51 | 12.54  | -0.1169 to 25.20  | No  | ns   | 0.0543  |
| 11 vs. 52 | 28.20  | 3.996 to 52.41    | Yes | *    | 0.0103  |
| 11 vs. 55 | 32.84  | 13.17 to 52.50    | Yes | **** | <0.0001 |
| 11 vs. 60 | 34.06  | 14.07 to 54.05    | Yes | **** | <0.0001 |
| 12 vs. 15 | 8.799  | 0.5170 to 17.08   | Yes | *    | 0.0280  |
| 12 vs. 20 | 12.72  | 3.021 to 22.42    | Yes | **   | 0.0023  |
| 12 vs. 21 | -18.67 | -38.07 to 0.7415  | No  | ns   | 0.0703  |
| 12 vs. 22 | 4.237  | -6.246 to 14.72   | No  | ns   | 0.9888  |
| 12 vs. 25 | 10.03  | 2.810 to 17.25    | Yes | **   | 0.0010  |



|           |        |                  |     |      |         |
|-----------|--------|------------------|-----|------|---------|
| 12 vs. 30 | 12.58  | 5.211 to 19.96   | Yes | **** | <0.0001 |
| 12 vs. 31 | -11.43 | -27.73 to 4.870  | No  | ns   | 0.4660  |
| 12 vs. 32 | 9.917  | -0.2189 to 20.05 | No  | ns   | 0.0607  |
| 12 vs. 35 | 12.78  | 1.833 to 23.73   | Yes | *    | 0.0101  |
| 12 vs. 40 | 17.67  | 9.115 to 26.23   | Yes | **** | <0.0001 |
| 12 vs. 41 | -9.074 | -25.85 to 7.705  | No  | ns   | 0.8523  |
| 12 vs. 42 | 12.68  | 2.584 to 22.78   | Yes | **   | 0.0041  |
| 12 vs. 45 | 16.20  | 7.960 to 24.43   | Yes | **** | <0.0001 |
| 12 vs. 50 | 16.70  | 7.596 to 25.81   | Yes | **** | <0.0001 |
| 12 vs. 51 | -6.626 | -23.59 to 10.34  | No  | ns   | 0.9923  |
| 12 vs. 52 | 9.038  | 0.2922 to 17.78  | Yes | *    | 0.0368  |
| 12 vs. 55 | 13.67  | 5.363 to 21.97   | Yes | **** | <0.0001 |
| 12 vs. 60 | 14.89  | 7.136 to 22.65   | Yes | **** | <0.0001 |
| 15 vs. 20 | 3.920  | -2.753 to 10.59  | No  | ns   | 0.7543  |
| 15 vs. 21 | -27.47 | -46.03 to -8.904 | Yes | ***  | 0.0004  |
| 15 vs. 22 | -4.563 | -13.48 to 4.352  | No  | ns   | 0.9004  |
| 15 vs. 25 | 1.231  | -6.304 to 8.767  | No  | ns   | >0.9999 |
| 15 vs. 30 | 3.784  | -3.048 to 10.62  | No  | ns   | 0.8273  |
| 15 vs. 31 | -20.23 | -36.83 to -3.629 | Yes | **   | 0.0060  |
| 15 vs. 32 | 1.118  | -8.360 to 10.60  | No  | ns   | >0.9999 |
| 15 vs. 35 | 3.982  | -5.858 to 13.82  | No  | ns   | 0.9886  |
| 15 vs. 40 | 8.871  | 1.664 to 16.08   | Yes | **   | 0.0053  |
| 15 vs. 41 | -17.87 | -36.18 to 0.4354 | No  | ns   | 0.0619  |
| 15 vs. 42 | 3.884  | -4.962 to 12.73  | No  | ns   | 0.9735  |
| 15 vs. 45 | 7.397  | -1.778 to 16.57  | No  | ns   | 0.2427  |
| 15 vs. 50 | 7.903  | -0.4186 to 16.22 | No  | ns   | 0.0781  |
| 15 vs. 51 | -15.43 | -32.73 to 1.875  | No  | ns   | 0.1270  |
| 15 vs. 52 | 0.2385 | -8.384 to 8.861  | No  | ns   | >0.9999 |
| 15 vs. 55 | 4.869  | -2.942 to 12.68  | No  | ns   | 0.6664  |
| 15 vs. 60 | 6.094  | -0.1880 to 12.38 | No  | ns   | 0.0653  |
| 20 vs. 21 | -31.39 | -50.32 to -12.45 | Yes | **** | <0.0001 |

|           |          |                  |     |      |         |
|-----------|----------|------------------|-----|------|---------|
| 20 vs. 22 | -8.483   | -18.28 to 1.317  | No  | ns   | 0.1561  |
| 20 vs. 25 | -2.689   | -11.64 to 6.262  | No  | ns   | 0.9998  |
| 20 vs. 30 | -0.1368  | -6.997 to 6.723  | No  | ns   | >0.9999 |
| 20 vs. 31 | -24.15   | -40.44 to -7.862 | Yes | ***  | 0.0004  |
| 20 vs. 32 | -2.802   | -13.66 to 8.051  | No  | ns   | >0.9999 |
| 20 vs. 35 | 0.06130  | -9.285 to 9.408  | No  | ns   | >0.9999 |
| 20 vs. 40 | 4.951    | -0.8432 to 10.74 | No  | ns   | 0.1702  |
| 20 vs. 41 | -21.79   | -39.50 to -4.086 | Yes | **   | 0.0053  |
| 20 vs. 42 | -0.03604 | -10.27 to 10.20  | No  | ns   | >0.9999 |
| 20 vs. 45 | 3.477    | -6.777 to 13.73  | No  | ns   | 0.9987  |
| 20 vs. 50 | 3.983    | -5.457 to 13.42  | No  | ns   | 0.9823  |
| 20 vs. 51 | -19.35   | -36.97 to -1.718 | Yes | *    | 0.0201  |
| 20 vs. 52 | -3.682   | -15.10 to 7.739  | No  | ns   | 0.9993  |
| 20 vs. 55 | 0.9488   | -7.241 to 9.139  | No  | ns   | >0.9999 |
| 20 vs. 60 | 2.173    | -5.805 to 10.15  | No  | ns   | >0.9999 |
| 21 vs. 22 | 22.90    | 1.692 to 44.11   | Yes | *    | 0.0238  |
| 21 vs. 25 | 28.70    | 9.053 to 48.34   | Yes | ***  | 0.0005  |
| 21 vs. 30 | 31.25    | 11.71 to 50.79   | Yes | ***  | 0.0001  |
| 21 vs. 31 | 7.234    | -4.693 to 19.16  | No  | ns   | 0.7085  |
| 21 vs. 32 | 28.58    | 9.807 to 47.36   | Yes | ***  | 0.0003  |
| 21 vs. 35 | 31.45    | 9.452 to 53.44   | Yes | ***  | 0.0007  |
| 21 vs. 40 | 36.34    | 18.50 to 54.18   | Yes | **** | <0.0001 |
| 21 vs. 41 | 9.592    | -2.960 to 22.14  | No  | ns   | 0.3219  |
| 21 vs. 42 | 31.35    | 12.58 to 50.12   | Yes | **** | <0.0001 |
| 21 vs. 45 | 34.86    | 16.98 to 52.75   | Yes | **** | <0.0001 |
| 21 vs. 50 | 35.37    | 18.82 to 51.92   | Yes | **** | <0.0001 |
| 21 vs. 51 | 12.04    | 2.381 to 21.70   | Yes | **   | 0.0045  |
| 21 vs. 52 | 27.70    | 6.278 to 49.13   | Yes | **   | 0.0028  |
| 21 vs. 55 | 32.33    | 15.31 to 49.36   | Yes | **** | <0.0001 |
| 21 vs. 60 | 33.56    | 15.54 to 51.58   | Yes | **** | <0.0001 |
| 22 vs. 25 | 5.794    | -4.146 to 15.73  | No  | ns   | 0.7648  |

|           |         |                   |     |     |         |
|-----------|---------|-------------------|-----|-----|---------|
| 22 vs. 30 | 8.346   | -2.399 to 19.09   | No  | ns  | 0.2966  |
| 22 vs. 31 | -15.67  | -34.57 to 3.236   | No  | ns  | 0.2063  |
| 22 vs. 32 | 5.681   | -3.711 to 15.07   | No  | ns  | 0.7126  |
| 22 vs. 35 | 8.544   | -2.463 to 19.55   | No  | ns  | 0.2976  |
| 22 vs. 40 | 13.43   | 3.639 to 23.23    | Yes | **  | 0.0013  |
| 22 vs. 41 | -13.31  | -32.05 to 5.430   | No  | ns  | 0.4438  |
| 22 vs. 42 | 8.447   | -0.8012 to 17.70  | No  | ns  | 0.1063  |
| 22 vs. 45 | 11.96   | 0.7475 to 23.17   | Yes | *   | 0.0269  |
| 22 vs. 50 | 12.47   | -0.3228 to 25.25  | No  | ns  | 0.0627  |
| 22 vs. 51 | -10.86  | -29.70 to 7.974   | No  | ns  | 0.7789  |
| 22 vs. 52 | 4.801   | -5.193 to 14.80   | No  | ns  | 0.9399  |
| 22 vs. 55 | 9.432   | -0.6789 to 19.54  | No  | ns  | 0.0902  |
| 22 vs. 60 | 10.66   | 0.5660 to 20.75   | Yes | *   | 0.0298  |
| 25 vs. 30 | 2.552   | -4.156 to 9.260   | No  | ns  | 0.9943  |
| 25 vs. 31 | -21.46  | -38.35 to -4.572  | Yes | **  | 0.0036  |
| 25 vs. 32 | -0.1135 | -9.179 to 8.952   | No  | ns  | >0.9999 |
| 25 vs. 35 | 2.750   | -7.262 to 12.76   | No  | ns  | >0.9999 |
| 25 vs. 40 | 7.640   | -0.1484 to 15.43  | No  | ns  | 0.0593  |
| 25 vs. 41 | -19.10  | -36.81 to -1.396  | Yes | *   | 0.0240  |
| 25 vs. 42 | 2.653   | -6.547 to 11.85   | No  | ns  | 0.9999  |
| 25 vs. 45 | 6.165   | -1.349 to 13.68   | No  | ns  | 0.2192  |
| 25 vs. 50 | 6.672   | -0.3326 to 13.68  | No  | ns  | 0.0762  |
| 25 vs. 51 | -16.66  | -33.03 to -0.2788 | Yes | *   | 0.0428  |
| 25 vs. 52 | -0.9930 | -8.996 to 7.010   | No  | ns  | >0.9999 |
| 25 vs. 55 | 3.638   | -2.286 to 9.561   | No  | ns  | 0.6898  |
| 25 vs. 60 | 4.862   | -0.5200 to 10.24  | No  | ns  | 0.1154  |
| 30 vs. 31 | -24.02  | -40.02 to -8.006  | Yes | *** | 0.0003  |
| 30 vs. 32 | -2.666  | -12.81 to 7.479   | No  | ns  | >0.9999 |
| 30 vs. 35 | 0.1981  | -9.732 to 10.13   | No  | ns  | >0.9999 |
| 30 vs. 40 | 5.088   | -1.588 to 11.76   | No  | ns  | 0.3261  |
| 30 vs. 41 | -21.66  | -40.61 to -2.706  | Yes | *   | 0.0129  |

|           |          |                    |     |      |         |
|-----------|----------|--------------------|-----|------|---------|
| 30 vs. 42 | 0.1007   | -9.876 to 10.08    | No  | ns   | >0.9999 |
| 30 vs. 45 | 3.613    | -6.055 to 13.28    | No  | ns   | 0.9954  |
| 30 vs. 50 | 4.119    | -3.683 to 11.92    | No  | ns   | 0.8749  |
| 30 vs. 51 | -19.21   | -36.91 to -1.507   | Yes | *    | 0.0226  |
| 30 vs. 52 | -3.545   | -13.44 to 6.350    | No  | ns   | 0.9973  |
| 30 vs. 55 | 1.086    | -6.576 to 8.747    | No  | ns   | >0.9999 |
| 30 vs. 60 | 2.310    | -4.182 to 8.802    | No  | ns   | 0.9975  |
| 31 vs. 32 | 21.35    | 5.131 to 37.57     | Yes | **   | 0.0022  |
| 31 vs. 35 | 24.21    | 4.936 to 43.49     | Yes | **   | 0.0041  |
| 31 vs. 40 | 29.10    | 13.92 to 44.29     | Yes | **** | <0.0001 |
| 31 vs. 41 | 2.358    | -10.27 to 14.99    | No  | ns   | >0.9999 |
| 31 vs. 42 | 24.12    | 6.563 to 41.67     | Yes | **   | 0.0012  |
| 31 vs. 45 | 27.63    | 11.15 to 44.11     | Yes | **** | <0.0001 |
| 31 vs. 50 | 28.13    | 13.27 to 43.00     | Yes | **** | <0.0001 |
| 31 vs. 51 | 4.806    | -6.200 to 15.81    | No  | ns   | 0.9749  |
| 31 vs. 52 | 20.47    | 1.712 to 39.23     | Yes | *    | 0.0213  |
| 31 vs. 55 | 25.10    | 9.918 to 40.28     | Yes | **** | <0.0001 |
| 31 vs. 60 | 26.33    | 11.71 to 40.94     | Yes | **** | <0.0001 |
| 32 vs. 35 | 2.864    | -7.927 to 13.65    | No  | ns   | >0.9999 |
| 32 vs. 40 | 7.753    | -2.307 to 17.81    | No  | ns   | 0.3086  |
| 32 vs. 41 | -18.99   | -36.22 to -1.762   | Yes | *    | 0.0192  |
| 32 vs. 42 | 2.766    | -3.977 to 9.510    | No  | ns   | 0.9868  |
| 32 vs. 45 | 6.279    | -2.434 to 14.99    | No  | ns   | 0.4189  |
| 32 vs. 50 | 6.785    | -2.855 to 16.43    | No  | ns   | 0.4596  |
| 32 vs. 51 | -16.54   | -32.99 to -0.09731 | Yes | *    | 0.0474  |
| 32 vs. 52 | -0.8795  | -10.30 to 8.546    | No  | ns   | >0.9999 |
| 32 vs. 55 | 3.751    | -4.677 to 12.18    | No  | ns   | 0.9698  |
| 32 vs. 60 | 4.976    | -3.468 to 13.42    | No  | ns   | 0.7500  |
| 35 vs. 40 | 4.889    | -4.601 to 14.38    | No  | ns   | 0.8953  |
| 35 vs. 41 | -21.85   | -42.39 to -1.319   | Yes | *    | 0.0276  |
| 35 vs. 42 | -0.09734 | -8.143 to 7.948    | No  | ns   | >0.9999 |

|           |         |                  |     |      |         |
|-----------|---------|------------------|-----|------|---------|
| 35 vs. 45 | 3.415   | -6.284 to 13.12  | No  | ns   | 0.9978  |
| 35 vs. 50 | 3.921   | -4.961 to 12.80  | No  | ns   | 0.9721  |
| 35 vs. 51 | -19.41  | -39.02 to 0.2056 | No  | ns   | 0.0550  |
| 35 vs. 52 | -3.743  | -14.33 to 6.846  | No  | ns   | 0.9977  |
| 35 vs. 55 | 0.8875  | -7.064 to 8.839  | No  | ns   | >0.9999 |
| 35 vs. 60 | 2.112   | -7.150 to 11.37  | No  | ns   | >0.9999 |
| 40 vs. 41 | -26.74  | -43.29 to -10.20 | Yes | **** | <0.0001 |
| 40 vs. 42 | -4.987  | -14.34 to 4.362  | No  | ns   | 0.8656  |
| 40 vs. 45 | -1.474  | -8.756 to 5.808  | No  | ns   | >0.9999 |
| 40 vs. 50 | -0.9682 | -8.818 to 6.882  | No  | ns   | >0.9999 |
| 40 vs. 51 | -24.30  | -40.08 to -8.516 | Yes | ***  | 0.0002  |
| 40 vs. 52 | -8.633  | -19.04 to 1.774  | No  | ns   | 0.2052  |
| 40 vs. 55 | -4.002  | -10.26 to 2.260  | No  | ns   | 0.6258  |
| 40 vs. 60 | -2.777  | -8.539 to 2.985  | No  | ns   | 0.9383  |
| 41 vs. 42 | 21.76   | 4.200 to 39.32   | Yes | **   | 0.0049  |
| 41 vs. 45 | 25.27   | 10.18 to 40.36   | Yes | **** | <0.0001 |
| 41 vs. 50 | 25.78   | 9.024 to 42.53   | Yes | ***  | 0.0002  |
| 41 vs. 51 | 2.448   | -7.858 to 12.75  | No  | ns   | >0.9999 |
| 41 vs. 52 | 18.11   | -1.614 to 37.84  | No  | ns   | 0.1021  |
| 41 vs. 55 | 22.74   | 6.992 to 38.49   | Yes | ***  | 0.0006  |
| 41 vs. 60 | 23.97   | 7.106 to 40.83   | Yes | ***  | 0.0007  |
| 42 vs. 45 | 3.513   | -3.749 to 10.77  | No  | ns   | 0.9364  |
| 42 vs. 50 | 4.019   | -4.568 to 12.60  | No  | ns   | 0.9521  |
| 42 vs. 51 | -19.31  | -35.47 to -3.150 | Yes | **   | 0.0077  |
| 42 vs. 52 | -3.646  | -11.87 to 4.582  | No  | ns   | 0.9711  |
| 42 vs. 55 | 0.9848  | -5.565 to 7.535  | No  | ns   | >0.9999 |
| 42 vs. 60 | 2.210   | -5.871 to 10.29  | No  | ns   | >0.9999 |
| 45 vs. 50 | 0.5060  | -6.851 to 7.863  | No  | ns   | >0.9999 |
| 45 vs. 51 | -22.82  | -37.22 to -8.421 | Yes | ***  | 0.0001  |
| 45 vs. 52 | -7.158  | -16.65 to 2.334  | No  | ns   | 0.3430  |
| 45 vs. 55 | -2.528  | -8.513 to 3.457  | No  | ns   | 0.9821  |

|           |        |                  |     |      |         |
|-----------|--------|------------------|-----|------|---------|
| 45 vs. 60 | -1.303 | -8.191 to 5.584  | No  | ns   | >0.9999 |
| 50 vs. 51 | -23.33 | -37.54 to -9.114 | Yes | **** | <0.0001 |
| 50 vs. 52 | -7.664 | -17.37 to 2.037  | No  | ns   | 0.2713  |
| 50 vs. 55 | -3.034 | -7.396 to 1.328  | No  | ns   | 0.4805  |
| 50 vs. 60 | -1.809 | -7.495 to 3.877  | No  | ns   | 0.9994  |
| 51 vs. 52 | 15.66  | -3.535 to 34.86  | No  | ns   | 0.2266  |
| 51 vs. 55 | 20.29  | 6.160 to 34.43   | Yes | ***  | 0.0006  |
| 51 vs. 60 | 21.52  | 6.796 to 36.24   | Yes | ***  | 0.0005  |
| 52 vs. 55 | 4.631  | -3.512 to 12.77  | No  | ns   | 0.7965  |
| 52 vs. 60 | 5.855  | -2.067 to 13.78  | No  | ns   | 0.3760  |
| 55 vs. 60 | 1.225  | -3.866 to 6.316  | No  | ns   | >0.9999 |

**Table S4. The statistical significance for comparison of VCL between different tracking periods for sperm cells exposed to 20-minute repetition time pulsed ultrasound (n=30, at each tracking period). Statistical significance was determined using ordinary one-way ANOVA matched values with Tukey's multiple-comparison test (\* P ≤ 0.05, \*\* P ≤ 0.01, \*\*\* P ≤ 0.001, \*\*\*\* P ≤ 0.0001, and ns denotes not significant).**

| Tukey's multiple comparisons test | Mean Diff. | 95.00% CI of diff. | Below threshold? | Summary | Adjusted P Value |
|-----------------------------------|------------|--------------------|------------------|---------|------------------|
| 0 vs. 5                           | 3.893      | -1.265 to 9.050    | No               | ns      | 0.3307           |
| 0 vs. 10                          | 5.045      | -0.4267 to 10.52   | No               | ns      | 0.0980           |
| 0 vs. 15                          | 7.794      | 2.887 to 12.70     | Yes              | ***     | 0.0001           |
| 0 vs. 20                          | 5.836      | -0.09266 to 11.77  | No               | ns      | 0.0575           |
| 0 vs. 21                          | -19.36     | -33.67 to -5.048   | Yes              | **      | 0.0015           |
| 0 vs. 22                          | -4.068     | -14.20 to 6.063    | No               | ns      | 0.9813           |
| 0 vs. 25                          | 2.879      | -4.111 to 9.868    | No               | ns      | 0.9765           |
| 0 vs. 30                          | 7.881      | 1.547 to 14.21     | Yes              | **      | 0.0046           |
| 0 vs. 35                          | 6.982      | 1.978 to 11.99     | Yes              | ***     | 0.0009           |
| 0 vs. 40                          | 7.462      | 2.545 to 12.38     | Yes              | ***     | 0.0002           |
| 0 vs. 41                          | -19.17     | -33.37 to -4.964   | Yes              | **      | 0.0015           |
| 0 vs. 42                          | 3.616      | -4.187 to 11.42    | No               | ns      | 0.9380           |
| 0 vs. 45                          | 8.728      | 3.729 to 13.73     | Yes              | ****    | <0.0001          |
| 0 vs. 50                          | 11.84      | 5.766 to 17.92     | Yes              | ****    | <0.0001          |
| 0 vs. 55                          | 12.36      | 7.058 to 17.67     | Yes              | ****    | <0.0001          |
| 0 vs. 60                          | 12.16      | 6.026 to 18.30     | Yes              | ****    | <0.0001          |
| 5 vs. 10                          | 1.153      | -3.742 to 6.047    | No               | ns      | >0.9999          |
| 5 vs. 15                          | 3.902      | -1.391 to 9.194    | No               | ns      | 0.3674           |
| 5 vs. 20                          | 1.943      | -2.894 to 6.780    | No               | ns      | 0.9812           |
| 5 vs. 21                          | -23.25     | -36.72 to -9.787   | Yes              | ****    | <0.0001          |
| 5 vs. 22                          | -7.961     | -18.11 to 2.187    | No               | ns      | 0.2739           |
| 5 vs. 25                          | -1.014     | -7.541 to 5.512    | No               | ns      | >0.9999          |
| 5 vs. 30                          | 3.988      | -1.322 to 9.298    | No               | ns      | 0.3384           |
| 5 vs. 35                          | 3.089      | -2.199 to 8.377    | No               | ns      | 0.7332           |
| 5 vs. 40                          | 3.570      | -1.656 to 8.795    | No               | ns      | 0.4920           |
| 5 vs. 41                          | -23.06     | -36.82 to -9.300   | Yes              | ****    | <0.0001          |

|           |         |                  |     |      |         |
|-----------|---------|------------------|-----|------|---------|
| 5 vs. 42  | -0.2769 | -8.463 to 7.909  | No  | ns   | >0.9999 |
| 5 vs. 45  | 4.835   | -0.7838 to 10.45 | No  | ns   | 0.1597  |
| 5 vs. 50  | 7.950   | 2.056 to 13.84   | Yes | **   | 0.0015  |
| 5 vs. 55  | 8.469   | 2.855 to 14.08   | Yes | ***  | 0.0003  |
| 5 vs. 60  | 8.272   | 2.437 to 14.11   | Yes | ***  | 0.0007  |
| 10 vs. 15 | 2.749   | -1.945 to 7.443  | No  | ns   | 0.7298  |
| 10 vs. 20 | 0.7908  | -3.689 to 5.270  | No  | ns   | >0.9999 |
| 10 vs. 21 | -24.40  | -37.73 to -11.08 | Yes | **** | <0.0001 |
| 10 vs. 22 | -9.113  | -18.58 to 0.3559 | No  | ns   | 0.0697  |
| 10 vs. 25 | -2.167  | -7.816 to 3.483  | No  | ns   | 0.9878  |
| 10 vs. 30 | 2.835   | -1.175 to 6.845  | No  | ns   | 0.4351  |
| 10 vs. 35 | 1.936   | -3.737 to 7.609  | No  | ns   | 0.9962  |
| 10 vs. 40 | 2.417   | -2.456 to 7.290  | No  | ns   | 0.8987  |
| 10 vs. 41 | -24.21  | -39.01 to -9.412 | Yes | **** | <0.0001 |
| 10 vs. 42 | -1.429  | -10.95 to 8.093  | No  | ns   | >0.9999 |
| 10 vs. 45 | 3.683   | -1.578 to 8.944  | No  | ns   | 0.4516  |
| 10 vs. 50 | 6.798   | 2.132 to 11.46   | Yes | ***  | 0.0005  |
| 10 vs. 55 | 7.317   | 2.651 to 11.98   | Yes | ***  | 0.0001  |
| 10 vs. 60 | 7.119   | 1.836 to 12.40   | Yes | **   | 0.0016  |
| 15 vs. 20 | -1.958  | -6.753 to 2.837  | No  | ns   | 0.9782  |
| 15 vs. 21 | -27.15  | -40.73 to -13.58 | Yes | **** | <0.0001 |
| 15 vs. 22 | -11.86  | -20.62 to -3.107 | Yes | **   | 0.0014  |
| 15 vs. 25 | -4.916  | -11.38 to 1.545  | No  | ns   | 0.3185  |
| 15 vs. 30 | 0.08624 | -4.495 to 4.667  | No  | ns   | >0.9999 |
| 15 vs. 35 | -0.8127 | -4.635 to 3.010  | No  | ns   | >0.9999 |
| 15 vs. 40 | -0.3320 | -5.163 to 4.499  | No  | ns   | >0.9999 |
| 15 vs. 41 | -26.96  | -42.15 to -11.77 | Yes | **** | <0.0001 |
| 15 vs. 42 | -4.178  | -12.06 to 3.701  | No  | ns   | 0.8439  |
| 15 vs. 45 | 0.9336  | -3.138 to 5.005  | No  | ns   | >0.9999 |
| 15 vs. 50 | 4.049   | -0.8917 to 8.989 | No  | ns   | 0.2157  |
| 15 vs. 55 | 4.568   | 0.2806 to 8.855  | Yes | *    | 0.0273  |



|           |        |                    |     |      |         |
|-----------|--------|--------------------|-----|------|---------|
| 15 vs. 60 | 4.370  | -0.6122 to 9.353   | No  | ns   | 0.1406  |
| 20 vs. 21 | -25.20 | -38.54 to -11.85   | Yes | **** | <0.0001 |
| 20 vs. 22 | -9.904 | -19.82 to 0.006465 | No  | ns   | 0.0503  |
| 20 vs. 25 | -2.958 | -9.329 to 3.414    | No  | ns   | 0.9372  |
| 20 vs. 30 | 2.044  | -3.077 to 7.166    | No  | ns   | 0.9822  |
| 20 vs. 35 | 1.146  | -3.323 to 5.614    | No  | ns   | 0.9999  |
| 20 vs. 40 | 1.626  | -3.960 to 7.212    | No  | ns   | 0.9994  |
| 20 vs. 41 | -25.00 | -39.71 to -10.29   | Yes | **** | <0.0001 |
| 20 vs. 42 | -2.220 | -10.86 to 6.416    | No  | ns   | 0.9999  |
| 20 vs. 45 | 2.892  | -3.060 to 8.844    | No  | ns   | 0.9123  |
| 20 vs. 50 | 6.007  | 0.1294 to 11.88    | Yes | *    | 0.0409  |
| 20 vs. 55 | 6.526  | 1.816 to 11.24     | Yes | **   | 0.0010  |
| 20 vs. 60 | 6.329  | 0.4129 to 12.24    | Yes | *    | 0.0262  |
| 21 vs. 22 | 15.29  | 1.430 to 29.15     | Yes | *    | 0.0190  |
| 21 vs. 25 | 22.24  | 9.284 to 35.19     | Yes | **** | <0.0001 |
| 21 vs. 30 | 27.24  | 14.33 to 40.15     | Yes | **** | <0.0001 |
| 21 vs. 35 | 26.34  | 12.38 to 40.30     | Yes | **** | <0.0001 |
| 21 vs. 40 | 26.82  | 12.37 to 41.28     | Yes | **** | <0.0001 |
| 21 vs. 41 | 0.1936 | -11.43 to 11.82    | No  | ns   | >0.9999 |
| 21 vs. 42 | 22.98  | 8.789 to 37.16     | Yes | **** | <0.0001 |
| 21 vs. 45 | 28.09  | 13.84 to 42.34     | Yes | **** | <0.0001 |
| 21 vs. 50 | 31.20  | 17.79 to 44.61     | Yes | **** | <0.0001 |
| 21 vs. 55 | 31.72  | 18.48 to 44.97     | Yes | **** | <0.0001 |
| 21 vs. 60 | 31.52  | 19.50 to 43.55     | Yes | **** | <0.0001 |
| 22 vs. 25 | 6.947  | -3.331 to 17.22    | No  | ns   | 0.5097  |
| 22 vs. 30 | 11.95  | 2.098 to 21.80     | Yes | **   | 0.0064  |
| 22 vs. 35 | 11.05  | 1.700 to 20.40     | Yes | **   | 0.0087  |
| 22 vs. 40 | 11.53  | 1.342 to 21.72     | Yes | *    | 0.0144  |
| 22 vs. 41 | -15.10 | -31.27 to 1.076    | No  | ns   | 0.0892  |
| 22 vs. 42 | 7.684  | -2.329 to 17.70    | No  | ns   | 0.3058  |
| 22 vs. 45 | 12.80  | 3.040 to 22.55     | Yes | **   | 0.0023  |

|           |         |                  |     |      |         |
|-----------|---------|------------------|-----|------|---------|
| 22 vs. 50 | 15.91   | 4.894 to 26.93   | Yes | ***  | 0.0005  |
| 22 vs. 55 | 16.43   | 5.830 to 27.03   | Yes | ***  | 0.0002  |
| 22 vs. 60 | 16.23   | 5.334 to 27.13   | Yes | ***  | 0.0003  |
| 25 vs. 30 | 5.002   | 0.1729 to 9.831  | Yes | *    | 0.0361  |
| 25 vs. 35 | 4.103   | -1.615 to 9.821  | No  | ns   | 0.4109  |
| 25 vs. 40 | 4.584   | -1.616 to 10.78  | No  | ns   | 0.3629  |
| 25 vs. 41 | -22.04  | -37.25 to -6.835 | Yes | ***  | 0.0005  |
| 25 vs. 42 | 0.7374  | -9.443 to 10.92  | No  | ns   | >0.9999 |
| 25 vs. 45 | 5.849   | -0.5786 to 12.28 | No  | ns   | 0.1082  |
| 25 vs. 50 | 8.965   | 2.743 to 15.19   | Yes | ***  | 0.0006  |
| 25 vs. 55 | 9.483   | 2.735 to 16.23   | Yes | ***  | 0.0008  |
| 25 vs. 60 | 9.286   | 2.944 to 15.63   | Yes | ***  | 0.0004  |
| 30 vs. 35 | -0.8989 | -5.542 to 3.744  | No  | ns   | >0.9999 |
| 30 vs. 40 | -0.4182 | -5.079 to 4.242  | No  | ns   | >0.9999 |
| 30 vs. 41 | -27.05  | -42.05 to -12.04 | Yes | **** | <0.0001 |
| 30 vs. 42 | -4.265  | -13.20 to 4.674  | No  | ns   | 0.9230  |
| 30 vs. 45 | 0.8474  | -3.269 to 4.963  | No  | ns   | >0.9999 |
| 30 vs. 50 | 3.963   | -0.5012 to 8.426 | No  | ns   | 0.1294  |
| 30 vs. 55 | 4.481   | -0.4076 to 9.370 | No  | ns   | 0.1025  |
| 30 vs. 60 | 4.284   | -0.3763 to 8.945 | No  | ns   | 0.1003  |
| 35 vs. 40 | 0.4807  | -3.820 to 4.781  | No  | ns   | >0.9999 |
| 35 vs. 41 | -26.15  | -40.99 to -11.31 | Yes | **** | <0.0001 |
| 35 vs. 42 | -3.366  | -10.62 to 3.892  | No  | ns   | 0.9377  |
| 35 vs. 45 | 1.746   | -2.603 to 6.095  | No  | ns   | 0.9813  |
| 35 vs. 50 | 4.862   | -0.5032 to 10.23 | No  | ns   | 0.1116  |
| 35 vs. 55 | 5.380   | 0.6111 to 10.15  | Yes | *    | 0.0149  |
| 35 vs. 60 | 5.183   | 0.04210 to 10.32 | Yes | *    | 0.0464  |
| 40 vs. 41 | -26.63  | -41.04 to -12.22 | Yes | **** | <0.0001 |
| 40 vs. 42 | -3.846  | -11.44 to 3.751  | No  | ns   | 0.8837  |
| 40 vs. 45 | 1.266   | -2.068 to 4.599  | No  | ns   | 0.9889  |
| 40 vs. 50 | 4.381   | 0.1251 to 8.637  | Yes | *    | 0.0383  |

|           |         |                   |     |      |         |
|-----------|---------|-------------------|-----|------|---------|
| 40 vs. 55 | 4.900   | -0.09148 to 9.891 | No  | ns   | 0.0589  |
| 40 vs. 60 | 4.702   | -0.2086 to 9.613  | No  | ns   | 0.0727  |
| 41 vs. 42 | 22.78   | 9.471 to 36.09    | Yes | **** | <0.0001 |
| 41 vs. 45 | 27.89   | 12.53 to 43.26    | Yes | **** | <0.0001 |
| 41 vs. 50 | 31.01   | 16.24 to 45.78    | Yes | **** | <0.0001 |
| 41 vs. 55 | 31.53   | 16.36 to 46.70    | Yes | **** | <0.0001 |
| 41 vs. 60 | 31.33   | 17.27 to 45.39    | Yes | **** | <0.0001 |
| 42 vs. 45 | 5.112   | -2.519 to 12.74   | No  | ns   | 0.5244  |
| 42 vs. 50 | 8.227   | -0.8539 to 17.31  | No  | ns   | 0.1118  |
| 42 vs. 55 | 8.746   | 0.03114 to 17.46  | Yes | *    | 0.0484  |
| 42 vs. 60 | 8.549   | 0.1314 to 16.97   | Yes | *    | 0.0434  |
| 45 vs. 50 | 3.115   | -1.312 to 7.543   | No  | ns   | 0.4432  |
| 45 vs. 55 | 3.634   | -1.286 to 8.554   | No  | ns   | 0.3643  |
| 45 vs. 60 | 3.437   | -1.433 to 8.306   | No  | ns   | 0.4380  |
| 50 vs. 55 | 0.5188  | -3.546 to 4.584   | No  | ns   | >0.9999 |
| 50 vs. 60 | 0.3216  | -3.359 to 4.002   | No  | ns   | >0.9999 |
| 55 vs. 60 | -0.1972 | -4.163 to 3.769   | No  | ns   | >0.9999 |

**Table S5. The statistical significance for comparison of VCL between different tracking periods for Grade B sperm cells exposed to 5-minute repetition time pulsed ultrasound (n=17, at each tracking period).** Statistical significance was determined using ordinary one-way ANOVA matched values with Tukey's multiple-comparison test (\* P ≤ 0.05, \*\* P ≤ 0.01, \*\*\* P ≤ 0.001, \*\*\*\* P ≤ 0.0001, and ns denotes not significant).

| Tukey's multiple comparisons test | Mean Diff. | 95.00% CI of diff. | Below threshold? | Summary | Adjusted P Value |
|-----------------------------------|------------|--------------------|------------------|---------|------------------|
| 0 vs. 5                           | 6.893      | -5.485 to 19.27    | No               | ns      | 0.7421           |
| 0 vs. 6                           | -30.00     | -46.14 to -13.86   | Yes              | ****    | <0.0001          |
| 0 vs. 7                           | -5.726     | -25.90 to 14.45    | No               | ns      | 0.9998           |
| 0 vs. 10                          | 0.2348     | -9.719 to 10.19    | No               | ns      | >0.9999          |
| 0 vs. 11                          | -25.19     | -52.14 to 1.761    | No               | ns      | 0.0815           |
| 0 vs. 12                          | -10.35     | -23.20 to 2.495    | No               | ns      | 0.2029           |
| 0 vs. 15                          | 3.910      | -9.075 to 16.90    | No               | ns      | 0.9995           |
| 0 vs. 16                          | -28.13     | -51.36 to -4.889   | Yes              | **      | 0.0100           |
| 0 vs. 17                          | 0.3839     | -13.71 to 14.48    | No               | ns      | >0.9999          |
| 0 vs. 20                          | 3.828      | -5.866 to 13.52    | No               | ns      | 0.9822           |
| 0 vs. 21                          | -17.35     | -40.39 to 5.678    | No               | ns      | 0.2843           |
| 0 vs. 22                          | -5.711     | -22.92 to 11.49    | No               | ns      | 0.9978           |
| 0 vs. 25                          | 4.036      | -10.06 to 18.13    | No               | ns      | 0.9998           |
| 0 vs. 26                          | -16.28     | -40.90 to 8.333    | No               | ns      | 0.4789           |
| 0 vs. 27                          | -2.923     | -22.57 to 16.72    | No               | ns      | >0.9999          |
| 0 vs. 30                          | 5.495      | -6.671 to 17.66    | No               | ns      | 0.9368           |
| 0 vs. 31                          | -19.74     | -43.96 to 4.483    | No               | ns      | 0.1909           |
| 0 vs. 32                          | -6.211     | -28.66 to 16.24    | No               | ns      | 0.9999           |
| 0 vs. 35                          | 3.968      | -6.872 to 14.81    | No               | ns      | 0.9924           |
| 0 vs. 36                          | -19.44     | -43.79 to 4.911    | No               | ns      | 0.2132           |
| 0 vs. 37                          | -5.786     | -23.51 to 11.94    | No               | ns      | 0.9983           |
| 0 vs. 40                          | 5.503      | -2.249 to 13.25    | No               | ns      | 0.3687           |
| 0 vs. 41                          | -6.956     | -29.77 to 15.86    | No               | ns      | 0.9994           |
| 0 vs. 42                          | -5.002     | -19.71 to 9.702    | No               | ns      | 0.9970           |
| 0 vs. 45                          | 9.705      | -7.654 to 27.06    | No               | ns      | 0.7367           |
| 0 vs. 46                          | -16.35     | -40.39 to 7.696    | No               | ns      | 0.4352           |

|          |        |                    |     |      |         |
|----------|--------|--------------------|-----|------|---------|
| 0 vs. 47 | -2.034 | -18.48 to 14.41    | No  | ns   | >0.9999 |
| 0 vs. 50 | 7.306  | -5.544 to 20.16    | No  | ns   | 0.7135  |
| 0 vs. 51 | -14.85 | -44.92 to 15.22    | No  | ns   | 0.8753  |
| 0 vs. 52 | 0.2133 | -12.56 to 12.98    | No  | ns   | >0.9999 |
| 0 vs. 55 | 8.368  | -2.771 to 19.51    | No  | ns   | 0.2883  |
| 0 vs. 60 | 7.577  | -4.791 to 19.95    | No  | ns   | 0.6016  |
| 5 vs. 6  | -36.89 | -53.57 to -20.22   | Yes | **** | <0.0001 |
| 5 vs. 7  | -12.62 | -41.97 to 16.73    | No  | ns   | 0.9646  |
| 5 vs. 10 | -6.658 | -16.09 to 2.772    | No  | ns   | 0.3893  |
| 5 vs. 11 | -32.08 | -58.65 to -5.512   | Yes | **   | 0.0097  |
| 5 vs. 12 | -17.24 | -29.40 to -5.086   | Yes | **   | 0.0018  |
| 5 vs. 15 | -2.983 | -15.18 to 9.213    | No  | ns   | >0.9999 |
| 5 vs. 16 | -35.02 | -60.54 to -9.496   | Yes | **   | 0.0026  |
| 5 vs. 17 | -6.509 | -28.48 to 15.46    | No  | ns   | 0.9997  |
| 5 vs. 20 | -3.065 | -15.54 to 9.410    | No  | ns   | >0.9999 |
| 5 vs. 21 | -24.25 | -48.50 to 0.003587 | No  | ns   | 0.0501  |
| 5 vs. 22 | -12.60 | -33.69 to 8.480    | No  | ns   | 0.6568  |
| 5 vs. 25 | -2.856 | -14.18 to 8.472    | No  | ns   | >0.9999 |
| 5 vs. 26 | -23.17 | -47.64 to 1.288    | No  | ns   | 0.0750  |
| 5 vs. 27 | -9.816 | -26.20 to 6.572    | No  | ns   | 0.6538  |
| 5 vs. 30 | -1.398 | -16.29 to 13.49    | No  | ns   | >0.9999 |
| 5 vs. 31 | -26.63 | -52.01 to -1.252   | Yes | *    | 0.0340  |
| 5 vs. 32 | -13.10 | -33.75 to 7.546    | No  | ns   | 0.5620  |
| 5 vs. 35 | -2.925 | -14.70 to 8.846    | No  | ns   | >0.9999 |
| 5 vs. 36 | -26.33 | -55.21 to 2.549    | No  | ns   | 0.0980  |
| 5 vs. 37 | -12.68 | -33.12 to 7.766    | No  | ns   | 0.5991  |
| 5 vs. 40 | -1.390 | -12.22 to 9.443    | No  | ns   | >0.9999 |
| 5 vs. 41 | -13.85 | -36.26 to 8.560    | No  | ns   | 0.6047  |
| 5 vs. 42 | -11.90 | -26.35 to 2.563    | No  | ns   | 0.1860  |
| 5 vs. 45 | 2.812  | -14.75 to 20.38    | No  | ns   | >0.9999 |
| 5 vs. 46 | -23.24 | -49.46 to 2.976    | No  | ns   | 0.1182  |

|          |        |                 |     |      |         |
|----------|--------|-----------------|-----|------|---------|
| 5 vs. 47 | -8.927 | -30.62 to 12.76 | No  | ns   | 0.9771  |
| 5 vs. 50 | 0.4132 | -10.78 to 11.60 | No  | ns   | >0.9999 |
| 5 vs. 51 | -21.74 | -54.90 to 11.42 | No  | ns   | 0.5086  |
| 5 vs. 52 | -6.680 | -24.43 to 11.07 | No  | ns   | 0.9915  |
| 5 vs. 55 | 1.475  | -11.75 to 14.70 | No  | ns   | >0.9999 |
| 5 vs. 60 | 0.6842 | -8.240 to 9.609 | No  | ns   | >0.9999 |
| 6 vs. 7  | 24.27  | -7.949 to 56.50 | No  | ns   | 0.2937  |
| 6 vs. 10 | 30.24  | 11.95 to 48.52  | Yes | ***  | 0.0003  |
| 6 vs. 11 | 4.813  | -11.66 to 21.29 | No  | ns   | 0.9998  |
| 6 vs. 12 | 19.65  | 3.485 to 35.82  | Yes | **   | 0.0091  |
| 6 vs. 15 | 33.91  | 13.99 to 53.83  | Yes | ***  | 0.0002  |
| 6 vs. 16 | 1.875  | -13.23 to 16.98 | No  | ns   | >0.9999 |
| 6 vs. 17 | 30.38  | 4.951 to 55.82  | Yes | *    | 0.0107  |
| 6 vs. 20 | 33.83  | 16.22 to 51.43  | Yes | **** | <0.0001 |
| 6 vs. 21 | 12.65  | -3.479 to 28.77 | No  | ns   | 0.2410  |
| 6 vs. 22 | 24.29  | 3.116 to 45.46  | Yes | *    | 0.0156  |
| 6 vs. 25 | 34.04  | 15.87 to 52.21  | Yes | **** | <0.0001 |
| 6 vs. 26 | 13.72  | -2.694 to 30.13 | No  | ns   | 0.1698  |
| 6 vs. 27 | 27.08  | 9.450 to 44.71  | Yes | ***  | 0.0007  |
| 6 vs. 30 | 35.50  | 15.96 to 55.03  | Yes | **** | <0.0001 |
| 6 vs. 31 | 10.26  | -9.521 to 30.04 | No  | ns   | 0.8416  |
| 6 vs. 32 | 23.79  | 4.393 to 43.19  | Yes | **   | 0.0083  |
| 6 vs. 35 | 33.97  | 17.47 to 50.47  | Yes | **** | <0.0001 |
| 6 vs. 36 | 10.56  | -11.80 to 32.92 | No  | ns   | 0.9195  |
| 6 vs. 37 | 24.22  | -1.705 to 50.14 | No  | ns   | 0.0828  |
| 6 vs. 40 | 35.50  | 20.92 to 50.09  | Yes | **** | <0.0001 |
| 6 vs. 41 | 23.04  | 3.509 to 42.58  | Yes | *    | 0.0121  |
| 6 vs. 42 | 25.00  | 7.742 to 42.25  | Yes | **   | 0.0015  |
| 6 vs. 45 | 39.71  | 20.11 to 59.30  | Yes | **** | <0.0001 |
| 6 vs. 46 | 13.65  | -6.792 to 34.10 | No  | ns   | 0.4784  |
| 6 vs. 47 | 27.97  | 7.699 to 48.23  | Yes | **   | 0.0025  |

|          |          |                 |     |      |         |
|----------|----------|-----------------|-----|------|---------|
| 6 vs. 50 | 37.31    | 20.68 to 53.93  | Yes | **** | <0.0001 |
| 6 vs. 51 | 15.15    | -11.42 to 41.73 | No  | ns   | 0.7263  |
| 6 vs. 52 | 30.21    | 13.07 to 47.36  | Yes | ***  | 0.0001  |
| 6 vs. 55 | 38.37    | 22.28 to 54.46  | Yes | **** | <0.0001 |
| 6 vs. 60 | 37.58    | 19.58 to 55.58  | Yes | **** | <0.0001 |
| 7 vs. 10 | 5.960    | -19.13 to 31.05 | No  | ns   | >0.9999 |
| 7 vs. 11 | -19.46   | -60.35 to 21.43 | No  | ns   | 0.9144  |
| 7 vs. 12 | -4.625   | -30.70 to 21.45 | No  | ns   | >0.9999 |
| 7 vs. 15 | 9.636    | -16.61 to 35.88 | No  | ns   | 0.9937  |
| 7 vs. 16 | -22.40   | -59.42 to 14.63 | No  | ns   | 0.6383  |
| 7 vs. 17 | 6.110    | -11.07 to 23.29 | No  | ns   | 0.9958  |
| 7 vs. 20 | 9.554    | -12.74 to 31.84 | No  | ns   | 0.9656  |
| 7 vs. 21 | -11.63   | -50.15 to 26.89 | No  | ns   | 0.9996  |
| 7 vs. 22 | 0.01445  | -20.86 to 20.89 | No  | ns   | >0.9999 |
| 7 vs. 25 | 9.762    | -16.70 to 36.22 | No  | ns   | 0.9933  |
| 7 vs. 26 | -10.56   | -49.34 to 28.23 | No  | ns   | >0.9999 |
| 7 vs. 27 | 2.803    | -26.97 to 32.57 | No  | ns   | >0.9999 |
| 7 vs. 30 | 11.22    | -16.47 to 38.91 | No  | ns   | 0.9805  |
| 7 vs. 31 | -14.01   | -54.06 to 26.03 | No  | ns   | 0.9966  |
| 7 vs. 32 | -0.4849  | -33.73 to 32.76 | No  | ns   | >0.9999 |
| 7 vs. 35 | 9.694    | -16.39 to 35.77 | No  | ns   | 0.9927  |
| 7 vs. 36 | -13.71   | -53.53 to 26.10 | No  | ns   | 0.9972  |
| 7 vs. 37 | -0.05993 | -20.96 to 20.84 | No  | ns   | >0.9999 |
| 7 vs. 40 | 11.23    | -13.16 to 35.62 | No  | ns   | 0.9346  |
| 7 vs. 41 | -1.230   | -37.69 to 35.23 | No  | ns   | >0.9999 |
| 7 vs. 42 | 0.7232   | -26.95 to 28.40 | No  | ns   | >0.9999 |
| 7 vs. 45 | 15.43    | -14.49 to 45.36 | No  | ns   | 0.8477  |
| 7 vs. 46 | -10.62   | -44.57 to 23.33 | No  | ns   | 0.9993  |
| 7 vs. 47 | 3.692    | -22.09 to 29.47 | No  | ns   | >0.9999 |
| 7 vs. 50 | 13.03    | -16.18 to 42.24 | No  | ns   | 0.9502  |
| 7 vs. 51 | -9.122   | -51.23 to 32.98 | No  | ns   | >0.9999 |

|           |          |                  |     |    |         |
|-----------|----------|------------------|-----|----|---------|
| 7 vs. 52  | 5.939    | -21.47 to 33.35  | No  | ns | >0.9999 |
| 7 vs. 55  | 14.09    | -13.56 to 41.75  | No  | ns | 0.8591  |
| 7 vs. 60  | 13.30    | -12.94 to 39.54  | No  | ns | 0.8641  |
| 10 vs. 11 | -25.42   | -51.54 to 0.6965 | No  | ns | 0.0615  |
| 10 vs. 12 | -10.59   | -23.38 to 2.210  | No  | ns | 0.1802  |
| 10 vs. 15 | 3.675    | -7.237 to 14.59  | No  | ns | 0.9979  |
| 10 vs. 16 | -28.36   | -53.68 to -3.037 | Yes | *  | 0.0194  |
| 10 vs. 17 | 0.1491   | -17.44 to 17.73  | No  | ns | >0.9999 |
| 10 vs. 20 | 3.593    | -7.801 to 14.99  | No  | ns | 0.9992  |
| 10 vs. 21 | -17.59   | -40.40 to 5.223  | No  | ns | 0.2625  |
| 10 vs. 22 | -5.946   | -23.79 to 11.90  | No  | ns | 0.9982  |
| 10 vs. 25 | 3.802    | -7.781 to 15.38  | No  | ns | 0.9986  |
| 10 vs. 26 | -16.52   | -42.08 to 9.052  | No  | ns | 0.5328  |
| 10 vs. 27 | -3.158   | -20.70 to 14.38  | No  | ns | >0.9999 |
| 10 vs. 30 | 5.260    | -8.986 to 19.51  | No  | ns | 0.9932  |
| 10 vs. 31 | -19.97   | -45.56 to 5.615  | No  | ns | 0.2469  |
| 10 vs. 32 | -6.445   | -30.71 to 17.82  | No  | ns | >0.9999 |
| 10 vs. 35 | 3.733    | -9.199 to 16.67  | No  | ns | 0.9998  |
| 10 vs. 36 | -19.67   | -46.59 to 7.237  | No  | ns | 0.3365  |
| 10 vs. 37 | -6.020   | -26.69 to 14.65  | No  | ns | 0.9998  |
| 10 vs. 40 | 5.268    | -4.367 to 14.90  | No  | ns | 0.7817  |
| 10 vs. 41 | -7.191   | -29.76 to 15.38  | No  | ns | 0.9991  |
| 10 vs. 42 | -5.237   | -20.04 to 9.562  | No  | ns | 0.9960  |
| 10 vs. 45 | 9.470    | -5.518 to 24.46  | No  | ns | 0.5689  |
| 10 vs. 46 | -16.58   | -40.33 to 7.164  | No  | ns | 0.4065  |
| 10 vs. 47 | -2.269   | -22.29 to 17.75  | No  | ns | >0.9999 |
| 10 vs. 50 | 7.071    | -4.886 to 19.03  | No  | ns | 0.6732  |
| 10 vs. 51 | -15.08   | -47.01 to 16.85  | No  | ns | 0.9194  |
| 10 vs. 52 | -0.02152 | -17.04 to 16.99  | No  | ns | >0.9999 |
| 10 vs. 55 | 8.133    | -1.809 to 18.08  | No  | ns | 0.1921  |
| 10 vs. 60 | 7.342    | -0.6204 to 15.30 | No  | ns | 0.0907  |



|           |        |                   |     |     |         |
|-----------|--------|-------------------|-----|-----|---------|
| 11 vs. 12 | 14.84  | -10.43 to 40.10   | No  | ns  | 0.6838  |
| 11 vs. 15 | 29.10  | 1.147 to 57.05    | Yes | *   | 0.0363  |
| 11 vs. 16 | -2.938 | -22.70 to 16.83   | No  | ns  | >0.9999 |
| 11 vs. 17 | 25.57  | -7.808 to 58.95   | No  | ns  | 0.2710  |
| 11 vs. 20 | 29.02  | -0.02317 to 58.05 | No  | ns  | 0.0503  |
| 11 vs. 21 | 7.833  | -2.065 to 17.73   | No  | ns  | 0.2299  |
| 11 vs. 22 | 19.48  | -7.745 to 46.70   | No  | ns  | 0.3688  |
| 11 vs. 25 | 29.22  | 0.7550 to 57.69   | Yes | *   | 0.0406  |
| 11 vs. 26 | 8.906  | -8.151 to 25.96   | No  | ns  | 0.8348  |
| 11 vs. 27 | 22.26  | -4.322 to 48.85   | No  | ns  | 0.1679  |
| 11 vs. 30 | 30.68  | 5.456 to 55.91    | Yes | **  | 0.0090  |
| 11 vs. 31 | 5.449  | -14.05 to 24.95   | No  | ns  | 0.9999  |
| 11 vs. 32 | 18.98  | -10.56 to 48.51   | No  | ns  | 0.5418  |
| 11 vs. 35 | 29.16  | 3.213 to 55.10    | Yes | *   | 0.0188  |
| 11 vs. 36 | 5.748  | -14.22 to 25.72   | No  | ns  | 0.9998  |
| 11 vs. 37 | 19.40  | -15.94 to 54.74   | No  | ns  | 0.7767  |
| 11 vs. 40 | 30.69  | 6.846 to 54.53    | Yes | **  | 0.0051  |
| 11 vs. 41 | 18.23  | -2.872 to 39.33   | No  | ns  | 0.1392  |
| 11 vs. 42 | 20.18  | -6.748 to 47.12   | No  | ns  | 0.3009  |
| 11 vs. 45 | 34.89  | 12.12 to 57.67    | Yes | *** | 0.0008  |
| 11 vs. 46 | 8.840  | -12.66 to 30.34   | No  | ns  | 0.9773  |
| 11 vs. 47 | 23.15  | -5.128 to 51.44   | No  | ns  | 0.1913  |
| 11 vs. 50 | 32.49  | 7.576 to 57.41    | Yes | **  | 0.0045  |
| 11 vs. 51 | 10.34  | -13.08 to 33.76   | No  | ns  | 0.9546  |
| 11 vs. 52 | 25.40  | 0.05559 to 50.75  | Yes | *   | 0.0492  |
| 11 vs. 55 | 33.56  | 10.86 to 56.25    | Yes | **  | 0.0012  |
| 11 vs. 60 | 32.76  | 6.979 to 58.55    | Yes | **  | 0.0059  |
| 12 vs. 15 | 14.26  | 4.110 to 24.41    | Yes | **  | 0.0020  |
| 12 vs. 16 | -17.78 | -36.78 to 1.234   | No  | ns  | 0.0823  |
| 12 vs. 17 | 10.73  | -7.812 to 29.28   | No  | ns  | 0.7050  |
| 12 vs. 20 | 14.18  | 4.572 to 23.79    | Yes | **  | 0.0012  |

|           |          |                  |     |      |         |
|-----------|----------|------------------|-----|------|---------|
| 12 vs. 21 | -7.004   | -27.90 to 13.89  | No  | ns   | 0.9981  |
| 12 vs. 22 | 4.639    | -12.38 to 21.66  | No  | ns   | >0.9999 |
| 12 vs. 25 | 14.39    | 1.803 to 26.97   | Yes | *    | 0.0161  |
| 12 vs. 26 | -5.931   | -26.14 to 14.28  | No  | ns   | 0.9997  |
| 12 vs. 27 | 7.428    | -5.914 to 20.77  | No  | ns   | 0.7586  |
| 12 vs. 30 | 15.85    | 1.485 to 30.21   | Yes | *    | 0.0221  |
| 12 vs. 31 | -9.388   | -30.62 to 11.84  | No  | ns   | 0.9540  |
| 12 vs. 32 | 4.140    | -12.99 to 21.27  | No  | ns   | >0.9999 |
| 12 vs. 35 | 14.32    | 5.603 to 23.03   | Yes | ***  | 0.0003  |
| 12 vs. 36 | -9.089   | -35.08 to 16.90  | No  | ns   | 0.9966  |
| 12 vs. 37 | 4.565    | -12.89 to 22.02  | No  | ns   | >0.9999 |
| 12 vs. 40 | 15.85    | 8.469 to 23.24   | Yes | **** | <0.0001 |
| 12 vs. 41 | 3.395    | -16.80 to 23.59  | No  | ns   | >0.9999 |
| 12 vs. 42 | 5.348    | -8.109 to 18.81  | No  | ns   | 0.9842  |
| 12 vs. 45 | 20.06    | 2.571 to 37.54   | Yes | *    | 0.0157  |
| 12 vs. 46 | -5.996   | -26.45 to 14.46  | No  | ns   | 0.9997  |
| 12 vs. 47 | 8.317    | -5.296 to 21.93  | No  | ns   | 0.6229  |
| 12 vs. 50 | 17.66    | 7.946 to 27.37   | Yes | **** | <0.0001 |
| 12 vs. 51 | -4.498   | -32.28 to 23.29  | No  | ns   | >0.9999 |
| 12 vs. 52 | 10.56    | -2.424 to 23.55  | No  | ns   | 0.1984  |
| 12 vs. 55 | 18.72    | 6.488 to 30.95   | Yes | ***  | 0.0008  |
| 12 vs. 60 | 17.93    | 6.143 to 29.71   | Yes | ***  | 0.0008  |
| 15 vs. 16 | -32.04   | -54.88 to -9.195 | Yes | **   | 0.0021  |
| 15 vs. 17 | -3.526   | -19.92 to 12.87  | No  | ns   | >0.9999 |
| 15 vs. 20 | -0.08203 | -10.01 to 9.850  | No  | ns   | >0.9999 |
| 15 vs. 21 | -21.26   | -43.99 to 1.461  | No  | ns   | 0.0819  |
| 15 vs. 22 | -9.621   | -27.97 to 8.732  | No  | ns   | 0.8305  |
| 15 vs. 25 | 0.1261   | -13.67 to 13.92  | No  | ns   | >0.9999 |
| 15 vs. 26 | -20.19   | -41.48 to 1.097  | No  | ns   | 0.0743  |
| 15 vs. 27 | -6.833   | -24.15 to 10.49  | No  | ns   | 0.9854  |
| 15 vs. 30 | 1.585    | -11.14 to 14.31  | No  | ns   | >0.9999 |

|           |         |                  |     |     |         |
|-----------|---------|------------------|-----|-----|---------|
| 15 vs. 31 | -23.65  | -45.43 to -1.872 | Yes | *   | 0.0254  |
| 15 vs. 32 | -10.12  | -31.70 to 11.46  | No  | ns  | 0.9240  |
| 15 vs. 35 | 0.05770 | -11.72 to 11.84  | No  | ns  | >0.9999 |
| 15 vs. 36 | -23.35  | -48.42 to 1.724  | No  | ns  | 0.0847  |
| 15 vs. 37 | -9.696  | -28.80 to 9.405  | No  | ns  | 0.8629  |
| 15 vs. 40 | 1.593   | -8.446 to 11.63  | No  | ns  | >0.9999 |
| 15 vs. 41 | -10.87  | -33.06 to 11.33  | No  | ns  | 0.8941  |
| 15 vs. 42 | -8.913  | -26.19 to 8.361  | No  | ns  | 0.8471  |
| 15 vs. 45 | 5.795   | -11.16 to 22.75  | No  | ns  | 0.9975  |
| 15 vs. 46 | -20.26  | -42.25 to 1.732  | No  | ns  | 0.0913  |
| 15 vs. 47 | -5.944  | -22.28 to 10.39  | No  | ns  | 0.9943  |
| 15 vs. 50 | 3.396   | -5.266 to 12.06  | No  | ns  | 0.9864  |
| 15 vs. 51 | -18.76  | -46.52 to 9.005  | No  | ns  | 0.4594  |
| 15 vs. 52 | -3.697  | -18.03 to 10.63  | No  | ns  | >0.9999 |
| 15 vs. 55 | 4.458   | -9.143 to 18.06  | No  | ns  | 0.9986  |
| 15 vs. 60 | 3.667   | -6.823 to 14.16  | No  | ns  | 0.9966  |
| 16 vs. 17 | 28.51   | 0.1329 to 56.89  | Yes | *   | 0.0482  |
| 16 vs. 20 | 31.95   | 9.577 to 54.33   | Yes | **  | 0.0017  |
| 16 vs. 21 | 10.77   | -5.689 to 27.23  | No  | ns  | 0.5117  |
| 16 vs. 22 | 22.41   | -2.217 to 47.05  | No  | ns  | 0.0993  |
| 16 vs. 25 | 32.16   | 7.844 to 56.48   | Yes | **  | 0.0039  |
| 16 vs. 26 | 11.84   | -1.646 to 25.33  | No  | ns  | 0.1257  |
| 16 vs. 27 | 25.20   | 4.042 to 46.36   | Yes | *   | 0.0110  |
| 16 vs. 30 | 33.62   | 10.87 to 56.37   | Yes | **  | 0.0012  |
| 16 vs. 31 | 8.387   | -5.854 to 22.63  | No  | ns  | 0.6794  |
| 16 vs. 32 | 21.91   | 0.07249 to 43.76 | Yes | *   | 0.0487  |
| 16 vs. 35 | 32.09   | 11.78 to 52.41   | Yes | *** | 0.0005  |
| 16 vs. 36 | 8.686   | -9.218 to 26.59  | No  | ns  | 0.9009  |
| 16 vs. 37 | 22.34   | -6.793 to 51.47  | No  | ns  | 0.2697  |
| 16 vs. 40 | 33.63   | 14.54 to 52.72   | Yes | *** | 0.0001  |
| 16 vs. 41 | 21.17   | 3.933 to 38.41   | Yes | **  | 0.0082  |

|           |         |                 |     |      |         |
|-----------|---------|-----------------|-----|------|---------|
| 16 vs. 42 | 23.12   | 1.598 to 44.65  | Yes | *    | 0.0279  |
| 16 vs. 45 | 37.83   | 15.39 to 60.27  | Yes | ***  | 0.0002  |
| 16 vs. 46 | 11.78   | -4.858 to 28.41 | No  | ns   | 0.3850  |
| 16 vs. 47 | 26.09   | 7.082 to 45.10  | Yes | **   | 0.0026  |
| 16 vs. 50 | 35.43   | 15.28 to 55.59  | Yes | ***  | 0.0001  |
| 16 vs. 51 | 13.28   | -4.598 to 31.15 | No  | ns   | 0.3135  |
| 16 vs. 52 | 28.34   | 8.994 to 47.68  | Yes | **   | 0.0013  |
| 16 vs. 55 | 36.49   | 16.44 to 56.55  | Yes | **** | <0.0001 |
| 16 vs. 60 | 35.70   | 10.79 to 60.62  | Yes | **   | 0.0016  |
| 17 vs. 20 | 3.444   | -10.63 to 17.52 | No  | ns   | >0.9999 |
| 17 vs. 21 | -17.74  | -47.72 to 12.24 | No  | ns   | 0.6724  |
| 17 vs. 22 | -6.095  | -27.92 to 15.73 | No  | ns   | 0.9999  |
| 17 vs. 25 | 3.653   | -16.95 to 24.25 | No  | ns   | >0.9999 |
| 17 vs. 26 | -16.67  | -45.52 to 12.19 | No  | ns   | 0.7079  |
| 17 vs. 27 | -3.307  | -24.20 to 17.58 | No  | ns   | >0.9999 |
| 17 vs. 30 | 5.111   | -15.45 to 25.67 | No  | ns   | >0.9999 |
| 17 vs. 31 | -20.12  | -49.33 to 9.089 | No  | ns   | 0.4282  |
| 17 vs. 32 | -6.594  | -33.25 to 20.06 | No  | ns   | >0.9999 |
| 17 vs. 35 | 3.584   | -16.57 to 23.73 | No  | ns   | >0.9999 |
| 17 vs. 36 | -19.82  | -50.93 to 11.28 | No  | ns   | 0.5550  |
| 17 vs. 37 | -6.169  | -29.22 to 16.88 | No  | ns   | >0.9999 |
| 17 vs. 40 | 5.119   | -11.47 to 21.70 | No  | ns   | 0.9994  |
| 17 vs. 41 | -7.340  | -35.24 to 20.56 | No  | ns   | >0.9999 |
| 17 vs. 42 | -5.386  | -28.64 to 17.86 | No  | ns   | >0.9999 |
| 17 vs. 45 | 9.321   | -12.40 to 31.05 | No  | ns   | 0.9653  |
| 17 vs. 46 | -16.73  | -42.66 to 9.200 | No  | ns   | 0.5348  |
| 17 vs. 47 | -2.418  | -24.90 to 20.07 | No  | ns   | >0.9999 |
| 17 vs. 50 | 6.922   | -13.83 to 27.68 | No  | ns   | 0.9982  |
| 17 vs. 51 | -15.23  | -46.97 to 16.51 | No  | ns   | 0.9088  |
| 17 vs. 52 | -0.1706 | -21.79 to 21.45 | No  | ns   | >0.9999 |
| 17 vs. 55 | 7.984   | -11.79 to 27.76 | No  | ns   | 0.9812  |

|           |        |                  |     |    |         |
|-----------|--------|------------------|-----|----|---------|
| 17 vs. 60 | 7.193  | -12.66 to 27.04  | No  | ns | 0.9946  |
| 20 vs. 21 | -21.18 | -45.99 to 3.624  | No  | ns | 0.1495  |
| 20 vs. 22 | -9.539 | -27.73 to 8.648  | No  | ns | 0.8300  |
| 20 vs. 25 | 0.2081 | -11.60 to 12.02  | No  | ns | >0.9999 |
| 20 vs. 26 | -20.11 | -43.73 to 3.508  | No  | ns | 0.1521  |
| 20 vs. 27 | -6.751 | -22.39 to 8.888  | No  | ns | 0.9632  |
| 20 vs. 30 | 1.667  | -13.94 to 17.27  | No  | ns | >0.9999 |
| 20 vs. 31 | -23.57 | -48.58 to 1.446  | No  | ns | 0.0780  |
| 20 vs. 32 | -10.04 | -27.75 to 7.669  | No  | ns | 0.7343  |
| 20 vs. 35 | 0.1397 | -10.49 to 10.77  | No  | ns | >0.9999 |
| 20 vs. 36 | -23.27 | -50.35 to 3.812  | No  | ns | 0.1439  |
| 20 vs. 37 | -9.614 | -25.94 to 6.716  | No  | ns | 0.6799  |
| 20 vs. 40 | 1.675  | -7.200 to 10.55  | No  | ns | >0.9999 |
| 20 vs. 41 | -10.78 | -33.27 to 11.70  | No  | ns | 0.9092  |
| 20 vs. 42 | -8.831 | -24.93 to 7.273  | No  | ns | 0.7781  |
| 20 vs. 45 | 5.877  | -12.87 to 24.62  | No  | ns | 0.9993  |
| 20 vs. 46 | -20.18 | -42.73 to 2.375  | No  | ns | 0.1113  |
| 20 vs. 47 | -5.862 | -21.32 to 9.592  | No  | ns | 0.9906  |
| 20 vs. 50 | 3.478  | -8.352 to 15.31  | No  | ns | 0.9997  |
| 20 vs. 51 | -18.68 | -48.54 to 11.19  | No  | ns | 0.5856  |
| 20 vs. 52 | -3.615 | -17.62 to 10.39  | No  | ns | >0.9999 |
| 20 vs. 55 | 4.540  | -9.634 to 18.71  | No  | ns | 0.9990  |
| 20 vs. 60 | 3.749  | -9.005 to 16.50  | No  | ns | 0.9997  |
| 21 vs. 22 | 11.64  | -12.72 to 36.00  | No  | ns | 0.9116  |
| 21 vs. 25 | 21.39  | -4.411 to 47.19  | No  | ns | 0.1781  |
| 21 vs. 26 | 1.073  | -11.91 to 14.06  | No  | ns | >0.9999 |
| 21 vs. 27 | 14.43  | -10.70 to 39.56  | No  | ns | 0.7161  |
| 21 vs. 30 | 22.85  | 1.391 to 44.31   | Yes | *  | 0.0301  |
| 21 vs. 31 | -2.384 | -17.04 to 12.27  | No  | ns | >0.9999 |
| 21 vs. 32 | 11.14  | -15.91 to 38.20  | No  | ns | 0.9768  |
| 21 vs. 35 | 21.32  | -0.9228 to 43.57 | No  | ns | 0.0689  |

|           |          |                 |     |    |         |
|-----------|----------|-----------------|-----|----|---------|
| 21 vs. 36 | -2.085   | -18.27 to 14.10 | No  | ns | >0.9999 |
| 21 vs. 37 | 11.57    | -20.46 to 43.59 | No  | ns | 0.9948  |
| 21 vs. 40 | 22.86    | 2.686 to 43.03  | Yes | *  | 0.0175  |
| 21 vs. 41 | 10.40    | -10.49 to 31.29 | No  | ns | 0.8802  |
| 21 vs. 42 | 12.35    | -12.40 to 37.11 | No  | ns | 0.8783  |
| 21 vs. 45 | 27.06    | 5.975 to 48.14  | Yes | ** | 0.0053  |
| 21 vs. 46 | 1.008    | -16.76 to 18.77 | No  | ns | >0.9999 |
| 21 vs. 47 | 15.32    | -7.174 to 37.82 | No  | ns | 0.4465  |
| 21 vs. 50 | 24.66    | 4.740 to 44.58  | Yes | ** | 0.0076  |
| 21 vs. 51 | 2.507    | -17.21 to 22.22 | No  | ns | >0.9999 |
| 21 vs. 52 | 17.57    | -2.309 to 37.44 | No  | ns | 0.1205  |
| 21 vs. 55 | 25.72    | 6.285 to 45.16  | Yes | ** | 0.0039  |
| 21 vs. 60 | 24.93    | 2.206 to 47.66  | Yes | *  | 0.0233  |
| 22 vs. 25 | 9.748    | -9.173 to 28.67 | No  | ns | 0.8486  |
| 22 vs. 26 | -10.57   | -35.48 to 14.34 | No  | ns | 0.9688  |
| 22 vs. 27 | 2.788    | -20.19 to 25.76 | No  | ns | >0.9999 |
| 22 vs. 30 | 11.21    | -8.722 to 31.13 | No  | ns | 0.7454  |
| 22 vs. 31 | -14.03   | -42.23 to 14.18 | No  | ns | 0.8811  |
| 22 vs. 32 | -0.4994  | -24.65 to 23.65 | No  | ns | >0.9999 |
| 22 vs. 35 | 9.679    | -4.753 to 24.11 | No  | ns | 0.4714  |
| 22 vs. 36 | -13.73   | -41.63 to 14.17 | No  | ns | 0.8899  |
| 22 vs. 37 | -0.07438 | -15.84 to 15.69 | No  | ns | >0.9999 |
| 22 vs. 40 | 11.21    | -4.182 to 26.61 | No  | ns | 0.3420  |
| 22 vs. 41 | -1.245   | -26.88 to 24.39 | No  | ns | >0.9999 |
| 22 vs. 42 | 0.7087   | -17.46 to 18.88 | No  | ns | >0.9999 |
| 22 vs. 45 | 15.42    | -5.572 to 36.40 | No  | ns | 0.3296  |
| 22 vs. 46 | -10.64   | -34.28 to 13.01 | No  | ns | 0.9465  |
| 22 vs. 47 | 3.677    | -11.89 to 19.25 | No  | ns | >0.9999 |
| 22 vs. 50 | 13.02    | -4.394 to 30.43 | No  | ns | 0.3043  |
| 22 vs. 51 | -9.137   | -38.87 to 20.60 | No  | ns | 0.9995  |
| 22 vs. 52 | 5.924    | -13.81 to 25.65 | No  | ns | 0.9996  |

|           |          |                  |     |    |         |
|-----------|----------|------------------|-----|----|---------|
| 22 vs. 55 | 14.08    | -4.484 to 32.64  | No  | ns | 0.2844  |
| 22 vs. 60 | 13.29    | -3.595 to 30.17  | No  | ns | 0.2366  |
| 25 vs. 26 | -20.32   | -46.22 to 5.588  | No  | ns | 0.2409  |
| 25 vs. 27 | -6.959   | -19.48 to 5.561  | No  | ns | 0.7607  |
| 25 vs. 30 | 1.458    | -17.54 to 20.46  | No  | ns | >0.9999 |
| 25 vs. 31 | -23.78   | -49.87 to 2.323  | No  | ns | 0.0986  |
| 25 vs. 32 | -10.25   | -28.64 to 8.149  | No  | ns | 0.7580  |
| 25 vs. 35 | -0.06841 | -10.08 to 9.946  | No  | ns | >0.9999 |
| 25 vs. 36 | -23.48   | -52.93 to 5.978  | No  | ns | 0.2215  |
| 25 vs. 37 | -9.822   | -28.86 to 9.221  | No  | ns | 0.8474  |
| 25 vs. 40 | 1.466    | -9.738 to 12.67  | No  | ns | >0.9999 |
| 25 vs. 41 | -10.99   | -35.41 to 13.43  | No  | ns | 0.9461  |
| 25 vs. 42 | -9.039   | -22.54 to 4.461  | No  | ns | 0.4741  |
| 25 vs. 45 | 5.669    | -15.35 to 26.69  | No  | ns | >0.9999 |
| 25 vs. 46 | -20.38   | -44.75 to 3.979  | No  | ns | 0.1688  |
| 25 vs. 47 | -6.070   | -25.07 to 12.93  | No  | ns | 0.9990  |
| 25 vs. 50 | 3.270    | -7.314 to 13.85  | No  | ns | 0.9994  |
| 25 vs. 51 | -18.88   | -52.89 to 15.12  | No  | ns | 0.7621  |
| 25 vs. 52 | -3.823   | -22.87 to 15.23  | No  | ns | >0.9999 |
| 25 vs. 55 | 4.332    | -11.04 to 19.70  | No  | ns | 0.9999  |
| 25 vs. 60 | 3.541    | -6.372 to 13.45  | No  | ns | 0.9955  |
| 26 vs. 27 | 13.36    | -10.43 to 37.15  | No  | ns | 0.7471  |
| 26 vs. 30 | 21.78    | -0.8476 to 44.40 | No  | ns | 0.0668  |
| 26 vs. 31 | -3.457   | -16.90 to 9.987  | No  | ns | >0.9999 |
| 26 vs. 32 | 10.07    | -12.13 to 32.27  | No  | ns | 0.9424  |
| 26 vs. 35 | 20.25    | -1.068 to 41.57  | No  | ns | 0.0735  |
| 26 vs. 36 | -3.158   | -22.74 to 16.42  | No  | ns | >0.9999 |
| 26 vs. 37 | 10.50    | -20.24 to 41.23  | No  | ns | 0.9975  |
| 26 vs. 40 | 21.78    | 1.195 to 42.37   | Yes | *  | 0.0317  |
| 26 vs. 41 | 9.326    | -11.21 to 29.86  | No  | ns | 0.9418  |
| 26 vs. 42 | 11.28    | -14.00 to 36.56  | No  | ns | 0.9502  |

|           |          |                  |     |    |         |
|-----------|----------|------------------|-----|----|---------|
| 26 vs. 45 | 25.99    | 2.286 to 49.69   | Yes | *  | 0.0234  |
| 26 vs. 46 | -0.06550 | -19.27 to 19.14  | No  | ns | >0.9999 |
| 26 vs. 47 | 14.25    | -8.233 to 36.73  | No  | ns | 0.5640  |
| 26 vs. 50 | 23.59    | 4.634 to 42.54   | Yes | ** | 0.0072  |
| 26 vs. 51 | 1.433    | -14.38 to 17.25  | No  | ns | >0.9999 |
| 26 vs. 52 | 16.49    | -4.174 to 37.16  | No  | ns | 0.2199  |
| 26 vs. 55 | 24.65    | 1.729 to 47.57   | Yes | *  | 0.0276  |
| 26 vs. 60 | 23.86    | -0.6457 to 48.36 | No  | ns | 0.0613  |
| 27 vs. 30 | 8.418    | -14.24 to 31.08  | No  | ns | 0.9927  |
| 27 vs. 31 | -16.82   | -40.63 to 6.993  | No  | ns | 0.3888  |
| 27 vs. 32 | -3.288   | -19.01 to 12.44  | No  | ns | >0.9999 |
| 27 vs. 35 | 6.891    | -7.362 to 21.14  | No  | ns | 0.9034  |
| 27 vs. 36 | -16.52   | -45.78 to 12.75  | No  | ns | 0.7404  |
| 27 vs. 37 | -2.863   | -28.17 to 22.44  | No  | ns | >0.9999 |
| 27 vs. 40 | 8.426    | -5.241 to 22.09  | No  | ns | 0.6085  |
| 27 vs. 41 | -4.033   | -27.54 to 19.47  | No  | ns | >0.9999 |
| 27 vs. 42 | -2.080   | -18.23 to 14.07  | No  | ns | >0.9999 |
| 27 vs. 45 | 12.63    | -8.469 to 33.72  | No  | ns | 0.6548  |
| 27 vs. 46 | -13.42   | -35.29 to 8.437  | No  | ns | 0.6148  |
| 27 vs. 47 | 0.8890   | -21.20 to 22.98  | No  | ns | >0.9999 |
| 27 vs. 50 | 10.23    | -4.709 to 25.17  | No  | ns | 0.4378  |
| 27 vs. 51 | -11.93   | -43.36 to 19.51  | No  | ns | 0.9906  |
| 27 vs. 52 | 3.136    | -19.45 to 25.72  | No  | ns | >0.9999 |
| 27 vs. 55 | 11.29    | -5.351 to 27.93  | No  | ns | 0.4527  |
| 27 vs. 60 | 10.50    | -4.142 to 25.14  | No  | ns | 0.3654  |
| 30 vs. 31 | -25.23   | -44.61 to -5.855 | Yes | ** | 0.0046  |
| 30 vs. 32 | -11.71   | -38.27 to 14.86  | No  | ns | 0.9556  |
| 30 vs. 35 | -1.527   | -16.67 to 13.62  | No  | ns | >0.9999 |
| 30 vs. 36 | -24.93   | -46.08 to -3.793 | Yes | *  | 0.0121  |
| 30 vs. 37 | -11.28   | -29.76 to 7.201  | No  | ns | 0.6244  |
| 30 vs. 40 | 0.008022 | -10.90 to 10.92  | No  | ns | >0.9999 |



|           |         |                  |     |    |         |
|-----------|---------|------------------|-----|----|---------|
| 30 vs. 41 | -12.45  | -31.31 to 6.410  | No  | ns | 0.4973  |
| 30 vs. 42 | -10.50  | -26.61 to 5.617  | No  | ns | 0.5191  |
| 30 vs. 45 | 4.210   | -10.78 to 19.20  | No  | ns | 0.9999  |
| 30 vs. 46 | -21.84  | -44.29 to 0.6070 | No  | ns | 0.0616  |
| 30 vs. 47 | -7.529  | -25.80 to 10.75  | No  | ns | 0.9768  |
| 30 vs. 50 | 1.811   | -13.02 to 16.64  | No  | ns | >0.9999 |
| 30 vs. 51 | -20.34  | -46.46 to 5.772  | No  | ns | 0.2494  |
| 30 vs. 52 | -5.282  | -15.82 to 5.262  | No  | ns | 0.8749  |
| 30 vs. 55 | 2.873   | -8.721 to 14.47  | No  | ns | >0.9999 |
| 30 vs. 60 | 2.082   | -12.49 to 16.66  | No  | ns | >0.9999 |
| 31 vs. 32 | 13.53   | -12.58 to 39.64  | No  | ns | 0.8429  |
| 31 vs. 35 | 23.71   | 1.640 to 45.77   | Yes | *  | 0.0279  |
| 31 vs. 36 | 0.2994  | -14.47 to 15.06  | No  | ns | >0.9999 |
| 31 vs. 37 | 13.95   | -17.74 to 45.65  | No  | ns | 0.9558  |
| 31 vs. 40 | 25.24   | 5.522 to 44.96   | Yes | ** | 0.0054  |
| 31 vs. 41 | 12.78   | -7.441 to 33.01  | No  | ns | 0.5684  |
| 31 vs. 42 | 14.74   | -8.445 to 37.92  | No  | ns | 0.5590  |
| 31 vs. 45 | 29.44   | 7.180 to 51.71   | Yes | ** | 0.0039  |
| 31 vs. 46 | 3.392   | -14.10 to 20.88  | No  | ns | >0.9999 |
| 31 vs. 47 | 17.70   | -5.470 to 40.88  | No  | ns | 0.2747  |
| 31 vs. 50 | 27.04   | 7.771 to 46.32   | Yes | ** | 0.0021  |
| 31 vs. 51 | 4.891   | -11.60 to 21.38  | No  | ns | 0.9997  |
| 31 vs. 52 | 19.95   | 0.7647 to 39.14  | Yes | *  | 0.0366  |
| 31 vs. 55 | 28.11   | 8.311 to 47.90   | Yes | ** | 0.0018  |
| 31 vs. 60 | 27.32   | 3.309 to 51.32   | Yes | *  | 0.0168  |
| 32 vs. 35 | 10.18   | -4.658 to 25.01  | No  | ns | 0.4347  |
| 32 vs. 36 | -13.23  | -44.24 to 17.78  | No  | ns | 0.9672  |
| 32 vs. 37 | 0.4250  | -23.52 to 24.37  | No  | ns | >0.9999 |
| 32 vs. 40 | 11.71   | -6.591 to 30.02  | No  | ns | 0.5483  |
| 32 vs. 41 | -0.7452 | -26.17 to 24.68  | No  | ns | >0.9999 |
| 32 vs. 42 | 1.208   | -19.57 to 21.99  | No  | ns | >0.9999 |

|           |        |                 |     |    |         |
|-----------|--------|-----------------|-----|----|---------|
| 32 vs. 45 | 15.92  | -10.03 to 41.86 | No  | ns | 0.6163  |
| 32 vs. 46 | -10.14 | -33.56 to 13.29 | No  | ns | 0.9624  |
| 32 vs. 47 | 4.177  | -17.73 to 26.09 | No  | ns | >0.9999 |
| 32 vs. 50 | 13.52  | -3.370 to 30.40 | No  | ns | 0.2165  |
| 32 vs. 51 | -8.637 | -39.08 to 21.80 | No  | ns | 0.9999  |
| 32 vs. 52 | 6.424  | -17.79 to 30.63 | No  | ns | >0.9999 |
| 32 vs. 55 | 14.58  | -8.678 to 37.84 | No  | ns | 0.5817  |
| 32 vs. 60 | 13.79  | -7.180 to 34.76 | No  | ns | 0.5037  |
| 35 vs. 36 | -23.41 | -48.75 to 1.932 | No  | ns | 0.0896  |
| 35 vs. 37 | -9.754 | -24.46 to 4.955 | No  | ns | 0.4899  |
| 35 vs. 40 | 1.535  | -5.758 to 8.827 | No  | ns | >0.9999 |
| 35 vs. 41 | -10.92 | -31.98 to 10.14 | No  | ns | 0.8417  |
| 35 vs. 42 | -8.970 | -20.38 to 2.435 | No  | ns | 0.2374  |
| 35 vs. 45 | 5.737  | -12.13 to 23.60 | No  | ns | 0.9990  |
| 35 vs. 46 | -20.31 | -41.82 to 1.191 | No  | ns | 0.0765  |
| 35 vs. 47 | -6.002 | -19.90 to 7.899 | No  | ns | 0.9632  |
| 35 vs. 50 | 3.338  | -3.912 to 10.59 | No  | ns | 0.9347  |
| 35 vs. 51 | -18.82 | -46.79 to 9.159 | No  | ns | 0.4667  |
| 35 vs. 52 | -3.755 | -19.48 to 11.97 | No  | ns | >0.9999 |
| 35 vs. 55 | 4.400  | -8.288 to 17.09 | No  | ns | 0.9970  |
| 35 vs. 60 | 3.609  | -6.665 to 13.88 | No  | ns | 0.9964  |
| 36 vs. 37 | 13.65  | -18.27 to 45.58 | No  | ns | 0.9663  |
| 36 vs. 40 | 24.94  | 1.818 to 48.07  | Yes | *  | 0.0270  |
| 36 vs. 41 | 12.48  | -6.959 to 31.93 | No  | ns | 0.5427  |
| 36 vs. 42 | 14.44  | -13.71 to 42.58 | No  | ns | 0.8528  |
| 36 vs. 45 | 29.14  | 7.200 to 51.09  | Yes | ** | 0.0037  |
| 36 vs. 46 | 3.092  | -15.19 to 21.38 | No  | ns | >0.9999 |
| 36 vs. 47 | 17.41  | -5.691 to 40.50 | No  | ns | 0.2932  |
| 36 vs. 50 | 26.75  | 2.608 to 50.88  | Yes | *  | 0.0213  |
| 36 vs. 51 | 4.591  | -11.07 to 20.25 | No  | ns | 0.9997  |
| 36 vs. 52 | 19.65  | -1.099 to 40.40 | No  | ns | 0.0752  |

|           |        |                   |     |    |         |
|-----------|--------|-------------------|-----|----|---------|
| 36 vs. 55 | 27.81  | 5.932 to 49.68    | Yes | ** | 0.0058  |
| 36 vs. 60 | 27.02  | 0.6193 to 53.41   | Yes | *  | 0.0416  |
| 37 vs. 40 | 11.29  | -5.454 to 28.03   | No  | ns | 0.4628  |
| 37 vs. 41 | -1.170 | -28.44 to 26.10   | No  | ns | >0.9999 |
| 37 vs. 42 | 0.7831 | -18.73 to 20.30   | No  | ns | >0.9999 |
| 37 vs. 45 | 15.49  | -9.782 to 40.76   | No  | ns | 0.6177  |
| 37 vs. 46 | -10.56 | -40.06 to 18.94   | No  | ns | 0.9954  |
| 37 vs. 47 | 3.752  | -12.49 to 19.99   | No  | ns | >0.9999 |
| 37 vs. 50 | 13.09  | -6.571 to 32.75   | No  | ns | 0.4833  |
| 37 vs. 51 | -9.062 | -43.57 to 25.45   | No  | ns | >0.9999 |
| 37 vs. 52 | 5.999  | -12.25 to 24.25   | No  | ns | 0.9985  |
| 37 vs. 55 | 14.15  | -7.641 to 35.95   | No  | ns | 0.5241  |
| 37 vs. 60 | 13.36  | -6.171 to 32.90   | No  | ns | 0.4394  |
| 40 vs. 41 | -12.46 | -31.33 to 6.411   | No  | ns | 0.4970  |
| 40 vs. 42 | -10.51 | -20.45 to -0.5642 | Yes | *  | 0.0320  |
| 40 vs. 45 | 4.202  | -10.01 to 18.42   | No  | ns | 0.9997  |
| 40 vs. 46 | -21.85 | -40.77 to -2.935  | Yes | *  | 0.0147  |
| 40 vs. 47 | -7.537 | -22.60 to 7.525   | No  | ns | 0.8758  |
| 40 vs. 50 | 1.803  | -6.880 to 10.49   | No  | ns | >0.9999 |
| 40 vs. 51 | -20.35 | -46.87 to 6.167   | No  | ns | 0.2687  |
| 40 vs. 52 | -5.290 | -17.40 to 6.822   | No  | ns | 0.9590  |
| 40 vs. 55 | 2.865  | -4.695 to 10.43   | No  | ns | 0.9907  |
| 40 vs. 60 | 2.074  | -6.858 to 11.01   | No  | ns | >0.9999 |
| 41 vs. 42 | 1.953  | -20.05 to 23.95   | No  | ns | >0.9999 |
| 41 vs. 45 | 16.66  | 2.632 to 30.69    | Yes | *  | 0.0113  |
| 41 vs. 46 | -9.391 | -26.96 to 8.174   | No  | ns | 0.8087  |
| 41 vs. 47 | 4.922  | -19.09 to 28.93   | No  | ns | >0.9999 |
| 41 vs. 50 | 14.26  | -7.195 to 35.72   | No  | ns | 0.4861  |
| 41 vs. 51 | -7.892 | -29.15 to 13.36   | No  | ns | 0.9928  |
| 41 vs. 52 | 7.169  | -13.78 to 28.12   | No  | ns | 0.9975  |
| 41 vs. 55 | 15.32  | -2.671 to 33.32   | No  | ns | 0.1520  |

|           |        |                  |     |     |         |
|-----------|--------|------------------|-----|-----|---------|
| 41 vs. 60 | 14.53  | -8.230 to 37.30  | No  | ns  | 0.5520  |
| 42 vs. 45 | 14.71  | -3.107 to 32.52  | No  | ns  | 0.1823  |
| 42 vs. 46 | -11.34 | -34.23 to 11.54  | No  | ns  | 0.8839  |
| 42 vs. 47 | 2.969  | -17.26 to 23.20  | No  | ns  | >0.9999 |
| 42 vs. 50 | 12.31  | -1.166 to 25.78  | No  | ns  | 0.0968  |
| 42 vs. 51 | -9.846 | -41.55 to 21.86  | No  | ns  | 0.9994  |
| 42 vs. 52 | 5.216  | -12.91 to 23.34  | No  | ns  | 0.9998  |
| 42 vs. 55 | 13.37  | 2.588 to 24.15   | Yes | **  | 0.0075  |
| 42 vs. 60 | 12.58  | -0.8462 to 26.01 | No  | ns  | 0.0811  |
| 45 vs. 46 | -26.05 | -43.28 to -8.825 | Yes | *** | 0.0009  |
| 45 vs. 47 | -11.74 | -34.56 to 11.08  | No  | ns  | 0.8500  |
| 45 vs. 50 | -2.399 | -19.68 to 14.89  | No  | ns  | >0.9999 |
| 45 vs. 51 | -24.55 | -50.79 to 1.685  | No  | ns  | 0.0819  |
| 45 vs. 52 | -9.492 | -29.39 to 10.41  | No  | ns  | 0.9130  |
| 45 vs. 55 | -1.337 | -11.72 to 9.042  | No  | ns  | >0.9999 |
| 45 vs. 60 | -2.128 | -17.33 to 13.07  | No  | ns  | >0.9999 |
| 46 vs. 47 | 14.31  | -7.174 to 35.80  | No  | ns  | 0.4825  |
| 46 vs. 50 | 23.65  | 3.755 to 43.55   | Yes | *   | 0.0112  |
| 46 vs. 51 | 1.499  | -19.58 to 22.58  | No  | ns  | >0.9999 |
| 46 vs. 52 | 16.56  | -3.819 to 36.94  | No  | ns  | 0.1994  |
| 46 vs. 55 | 24.72  | 6.127 to 43.30   | Yes | **  | 0.0037  |
| 46 vs. 60 | 23.92  | 2.088 to 45.76   | Yes | *   | 0.0236  |
| 47 vs. 50 | 9.340  | -6.529 to 25.21  | No  | ns  | 0.6803  |
| 47 vs. 51 | -12.81 | -39.59 to 13.96  | No  | ns  | 0.9106  |
| 47 vs. 52 | 2.247  | -10.80 to 15.29  | No  | ns  | >0.9999 |
| 47 vs. 55 | 10.40  | -8.339 to 29.14  | No  | ns  | 0.7626  |
| 47 vs. 60 | 9.611  | -9.408 to 28.63  | No  | ns  | 0.8670  |
| 50 vs. 51 | -22.15 | -49.36 to 5.057  | No  | ns  | 0.1973  |
| 50 vs. 52 | -7.093 | -22.48 to 8.297  | No  | ns  | 0.9341  |
| 50 vs. 55 | 1.062  | -11.50 to 13.62  | No  | ns  | >0.9999 |
| 50 vs. 60 | 0.2711 | -8.801 to 9.343  | No  | ns  | >0.9999 |

|           |         |                 |    |    |         |
|-----------|---------|-----------------|----|----|---------|
| 51 vs. 52 | 15.06   | -10.86 to 40.98 | No | ns | 0.6991  |
| 51 vs. 55 | 23.22   | -4.075 to 50.51 | No | ns | 0.1530  |
| 51 vs. 60 | 22.43   | -9.348 to 54.20 | No | ns | 0.3899  |
| 52 vs. 55 | 8.155   | -6.877 to 23.19 | No | ns | 0.7913  |
| 52 vs. 60 | 7.364   | -9.862 to 24.59 | No | ns | 0.9665  |
| 55 vs. 60 | -0.7912 | -11.44 to 9.860 | No | ns | >0.9999 |

**Table S6. The statistical significance for comparison of VCL between different tracking periods for Grade C sperm cells exposed to 5-minute repetition time pulsed ultrasound (n=13, at each tracking period).** Statistical significance was determined using ordinary one-way ANOVA matched values with Tukey's multiple-comparison test (\* P ≤ 0.05, \*\* P ≤ 0.01, \*\*\* P ≤ 0.001, \*\*\*\* P ≤ 0.0001, and ns denotes not significant).

| Tukey's multiple comparisons test | Mean Diff. | 95.00% CI of diff. | Below threshold? | Summary | Adjusted P Value |
|-----------------------------------|------------|--------------------|------------------|---------|------------------|
| 0 vs. 5                           | 0.3867     | -13.11 to 13.89    | No               | ns      | >0.9999          |
| 0 vs. 6                           | -20.65     | -49.01 to 7.714    | No               | ns      | 0.2796           |
| 0 vs. 7                           | -12.34     | -35.86 to 11.18    | No               | ns      | 0.7299           |
| 0 vs. 10                          | -5.638     | -27.86 to 16.58    | No               | ns      | 0.9998           |
| 0 vs. 11                          | -18.18     | -50.64 to 14.29    | No               | ns      | 0.6438           |
| 0 vs. 12                          | -4.373     | -20.30 to 11.55    | No               | ns      | 0.9993           |
| 0 vs. 15                          | -3.658     | -21.86 to 14.54    | No               | ns      | >0.9999          |
| 0 vs. 16                          | -17.10     | -47.52 to 13.31    | No               | ns      | 0.6376           |
| 0 vs. 17                          | -2.241     | -19.22 to 14.73    | No               | ns      | >0.9999          |
| 0 vs. 20                          | -1.347     | -19.95 to 17.26    | No               | ns      | >0.9999          |
| 0 vs. 21                          | -17.21     | -50.20 to 15.78    | No               | ns      | 0.7372           |
| 0 vs. 22                          | -4.915     | -25.65 to 15.82    | No               | ns      | >0.9999          |
| 0 vs. 25                          | -2.514     | -20.73 to 15.71    | No               | ns      | >0.9999          |
| 0 vs. 26                          | -13.87     | -43.53 to 15.79    | No               | ns      | 0.8545           |
| 0 vs. 27                          | -4.872     | -23.69 to 13.95    | No               | ns      | 0.9997           |
| 0 vs. 30                          | -1.774     | -20.74 to 17.19    | No               | ns      | >0.9999          |
| 0 vs. 31                          | -13.15     | -45.07 to 18.77    | No               | ns      | 0.9399           |
| 0 vs. 32                          | -4.338     | -27.29 to 18.61    | No               | ns      | >0.9999          |
| 0 vs. 35                          | -3.309     | -23.97 to 17.35    | No               | ns      | >0.9999          |
| 0 vs. 36                          | -11.95     | -41.86 to 17.95    | No               | ns      | 0.9531           |
| 0 vs. 37                          | -3.622     | -24.35 to 17.10    | No               | ns      | >0.9999          |
| 0 vs. 40                          | -2.428     | -26.18 to 21.32    | No               | ns      | >0.9999          |
| 0 vs. 41                          | -9.332     | -32.34 to 13.68    | No               | ns      | 0.9471           |
| 0 vs. 42                          | -0.08507   | -17.98 to 17.81    | No               | ns      | >0.9999          |
| 0 vs. 45                          | -2.346     | -23.31 to 18.61    | No               | ns      | >0.9999          |
| 0 vs. 46                          | -8.559     | -38.56 to 21.44    | No               | ns      | 0.9989           |

|          |         |                  |     |    |         |
|----------|---------|------------------|-----|----|---------|
| 0 vs. 47 | 0.4184  | -18.62 to 19.45  | No  | ns | >0.9999 |
| 0 vs. 50 | -0.4655 | -18.76 to 17.83  | No  | ns | >0.9999 |
| 0 vs. 51 | -11.16  | -47.88 to 25.56  | No  | ns | 0.9974  |
| 0 vs. 52 | 1.382   | -16.13 to 18.90  | No  | ns | >0.9999 |
| 0 vs. 55 | 1.237   | -20.61 to 23.08  | No  | ns | >0.9999 |
| 0 vs. 60 | 2.778   | -12.88 to 18.43  | No  | ns | >0.9999 |
| 5 vs. 6  | -21.03  | -40.89 to -1.179 | Yes | *  | 0.0333  |
| 5 vs. 7  | -12.73  | -34.33 to 8.878  | No  | ns | 0.5979  |
| 5 vs. 10 | -6.024  | -19.81 to 7.762  | No  | ns | 0.9226  |
| 5 vs. 11 | -18.56  | -44.32 to 7.194  | No  | ns | 0.3069  |
| 5 vs. 12 | -4.760  | -16.55 to 7.031  | No  | ns | 0.9595  |
| 5 vs. 15 | -4.044  | -10.36 to 2.269  | No  | ns | 0.4724  |
| 5 vs. 16 | -17.49  | -41.37 to 6.387  | No  | ns | 0.2865  |
| 5 vs. 17 | -2.627  | -12.06 to 6.800  | No  | ns | 0.9995  |
| 5 vs. 20 | -1.734  | -11.97 to 8.498  | No  | ns | >0.9999 |
| 5 vs. 21 | -17.60  | -40.67 to 5.477  | No  | ns | 0.2391  |
| 5 vs. 22 | -5.302  | -18.72 to 8.115  | No  | ns | 0.9665  |
| 5 vs. 25 | -2.900  | -15.72 to 9.916  | No  | ns | >0.9999 |
| 5 vs. 26 | -14.26  | -32.85 to 4.342  | No  | ns | 0.2335  |
| 5 vs. 27 | -5.259  | -18.27 to 7.752  | No  | ns | 0.9590  |
| 5 vs. 30 | -2.160  | -13.13 to 8.807  | No  | ns | >0.9999 |
| 5 vs. 31 | -13.54  | -35.28 to 8.204  | No  | ns | 0.5148  |
| 5 vs. 32 | -4.725  | -19.95 to 10.50  | No  | ns | 0.9977  |
| 5 vs. 35 | -3.696  | -13.84 to 6.452  | No  | ns | 0.9849  |
| 5 vs. 36 | -12.34  | -31.47 to 6.791  | No  | ns | 0.4621  |
| 5 vs. 37 | -4.008  | -19.83 to 11.81  | No  | ns | 0.9999  |
| 5 vs. 40 | -2.815  | -16.07 to 10.44  | No  | ns | >0.9999 |
| 5 vs. 41 | -9.718  | -23.02 to 3.579  | No  | ns | 0.2893  |
| 5 vs. 42 | -0.4717 | -13.08 to 12.14  | No  | ns | >0.9999 |
| 5 vs. 45 | -2.733  | -16.03 to 10.56  | No  | ns | >0.9999 |
| 5 vs. 46 | -8.945  | -28.18 to 10.29  | No  | ns | 0.8796  |

|          |         |                  |    |    |         |
|----------|---------|------------------|----|----|---------|
| 5 vs. 47 | 0.03176 | -12.18 to 12.24  | No | ns | >0.9999 |
| 5 vs. 50 | -0.8522 | -10.95 to 9.248  | No | ns | >0.9999 |
| 5 vs. 51 | -11.55  | -35.01 to 11.91  | No | ns | 0.8278  |
| 5 vs. 52 | 0.9958  | -9.001 to 10.99  | No | ns | >0.9999 |
| 5 vs. 55 | 0.8504  | -10.49 to 12.19  | No | ns | >0.9999 |
| 5 vs. 60 | 2.391   | -12.69 to 17.47  | No | ns | >0.9999 |
| 6 vs. 7  | 8.305   | -23.49 to 40.10  | No | ns | 0.9998  |
| 6 vs. 10 | 15.01   | -7.061 to 37.08  | No | ns | 0.3852  |
| 6 vs. 11 | 2.471   | -15.62 to 20.56  | No | ns | >0.9999 |
| 6 vs. 12 | 16.27   | -11.12 to 43.66  | No | ns | 0.5852  |
| 6 vs. 15 | 16.99   | -2.835 to 36.81  | No | ns | 0.1312  |
| 6 vs. 16 | 3.543   | -14.33 to 21.41  | No | ns | >0.9999 |
| 6 vs. 17 | 18.41   | -3.114 to 39.93  | No | ns | 0.1327  |
| 6 vs. 20 | 19.30   | -0.5015 to 39.10 | No | ns | 0.0594  |
| 6 vs. 21 | 3.435   | -8.640 to 15.51  | No | ns | 0.9993  |
| 6 vs. 22 | 15.73   | -7.367 to 38.83  | No | ns | 0.3831  |
| 6 vs. 25 | 18.13   | -9.161 to 45.43  | No | ns | 0.4187  |
| 6 vs. 26 | 6.777   | -11.21 to 24.76  | No | ns | 0.9787  |
| 6 vs. 27 | 15.77   | -11.01 to 42.56  | No | ns | 0.5983  |
| 6 vs. 30 | 18.87   | -9.658 to 47.40  | No | ns | 0.4250  |
| 6 vs. 31 | 7.493   | -14.91 to 29.90  | No | ns | 0.9941  |
| 6 vs. 32 | 16.31   | -7.595 to 40.21  | No | ns | 0.3807  |
| 6 vs. 35 | 17.34   | -7.911 to 42.59  | No | ns | 0.3716  |
| 6 vs. 36 | 8.694   | -9.860 to 27.25  | No | ns | 0.8734  |
| 6 vs. 37 | 17.02   | -15.77 to 49.82  | No | ns | 0.7696  |
| 6 vs. 40 | 18.22   | -9.635 to 46.07  | No | ns | 0.4415  |
| 6 vs. 41 | 11.31   | -9.197 to 31.83  | No | ns | 0.6917  |
| 6 vs. 42 | 20.56   | -8.426 to 49.55  | No | ns | 0.3276  |
| 6 vs. 45 | 18.30   | -11.55 to 48.15  | No | ns | 0.5381  |
| 6 vs. 46 | 12.09   | -7.202 to 31.38  | No | ns | 0.5054  |
| 6 vs. 47 | 21.06   | -0.3534 to 42.48 | No | ns | 0.0560  |



|          |         |                  |    |    |         |
|----------|---------|------------------|----|----|---------|
| 6 vs. 50 | 20.18   | -5.907 to 46.27  | No | ns | 0.2236  |
| 6 vs. 51 | 9.484   | -9.043 to 28.01  | No | ns | 0.7859  |
| 6 vs. 52 | 22.03   | -2.732 to 46.79  | No | ns | 0.1056  |
| 6 vs. 55 | 21.88   | -0.2587 to 44.02 | No | ns | 0.0542  |
| 6 vs. 60 | 23.42   | -8.344 to 55.19  | No | ns | 0.2784  |
| 7 vs. 10 | 6.703   | -23.40 to 36.80  | No | ns | >0.9999 |
| 7 vs. 11 | -5.834  | -39.43 to 27.77  | No | ns | >0.9999 |
| 7 vs. 12 | 7.968   | -11.55 to 27.48  | No | ns | 0.9552  |
| 7 vs. 15 | 8.683   | -15.77 to 33.14  | No | ns | 0.9885  |
| 7 vs. 16 | -4.762  | -35.13 to 25.61  | No | ns | >0.9999 |
| 7 vs. 17 | 10.10   | -16.70 to 36.91  | No | ns | 0.9786  |
| 7 vs. 20 | 10.99   | -14.82 to 36.81  | No | ns | 0.9366  |
| 7 vs. 21 | -4.870  | -37.38 to 27.64  | No | ns | >0.9999 |
| 7 vs. 22 | 7.426   | -15.79 to 30.64  | No | ns | 0.9966  |
| 7 vs. 25 | 9.828   | -10.99 to 30.64  | No | ns | 0.8669  |
| 7 vs. 26 | -1.528  | -27.65 to 24.60  | No | ns | >0.9999 |
| 7 vs. 27 | 7.469   | -13.36 to 28.30  | No | ns | 0.9872  |
| 7 vs. 30 | 10.57   | -10.78 to 31.91  | No | ns | 0.8223  |
| 7 vs. 31 | -0.8118 | -35.38 to 33.75  | No | ns | >0.9999 |
| 7 vs. 32 | 8.003   | -22.49 to 38.50  | No | ns | 0.9998  |
| 7 vs. 35 | 9.032   | -12.12 to 30.19  | No | ns | 0.9353  |
| 7 vs. 36 | 0.3889  | -28.98 to 29.75  | No | ns | >0.9999 |
| 7 vs. 37 | 8.719   | -12.96 to 30.40  | No | ns | 0.9608  |
| 7 vs. 40 | 9.913   | -14.53 to 34.36  | No | ns | 0.9578  |
| 7 vs. 41 | 3.010   | -21.63 to 27.65  | No | ns | >0.9999 |
| 7 vs. 42 | 12.26   | -5.393 to 29.91  | No | ns | 0.3561  |
| 7 vs. 45 | 9.995   | -16.91 to 36.90  | No | ns | 0.9815  |
| 7 vs. 46 | 3.783   | -29.37 to 36.93  | No | ns | >0.9999 |
| 7 vs. 47 | 12.76   | -15.84 to 41.36  | No | ns | 0.9096  |
| 7 vs. 50 | 11.88   | -9.923 to 33.67  | No | ns | 0.7084  |
| 7 vs. 51 | 1.179   | -36.03 to 38.39  | No | ns | >0.9999 |

|           |        |                 |    |    |         |
|-----------|--------|-----------------|----|----|---------|
| 7 vs. 52  | 13.72  | -9.937 to 37.38 | No | ns | 0.6206  |
| 7 vs. 55  | 13.58  | -16.44 to 43.59 | No | ns | 0.9003  |
| 7 vs. 60  | 15.12  | -3.144 to 33.38 | No | ns | 0.1586  |
| 10 vs. 11 | -12.54 | -39.97 to 14.89 | No | ns | 0.8929  |
| 10 vs. 12 | 1.265  | -12.90 to 15.43 | No | ns | >0.9999 |
| 10 vs. 15 | 1.980  | -8.005 to 11.97 | No | ns | >0.9999 |
| 10 vs. 16 | -11.47 | -37.36 to 14.43 | No | ns | 0.9146  |
| 10 vs. 17 | 3.397  | -5.954 to 12.75 | No | ns | 0.9853  |
| 10 vs. 20 | 4.291  | -7.369 to 15.95 | No | ns | 0.9832  |
| 10 vs. 21 | -11.57 | -38.17 to 15.03 | No | ns | 0.9251  |
| 10 vs. 22 | 0.7228 | -11.12 to 12.57 | No | ns | >0.9999 |
| 10 vs. 25 | 3.124  | -12.41 to 18.66 | No | ns | >0.9999 |
| 10 vs. 26 | -8.231 | -30.93 to 14.47 | No | ns | 0.9856  |
| 10 vs. 27 | 0.7659 | -16.24 to 17.78 | No | ns | >0.9999 |
| 10 vs. 30 | 3.864  | -13.30 to 21.03 | No | ns | >0.9999 |
| 10 vs. 31 | -7.515 | -29.93 to 14.90 | No | ns | 0.9940  |
| 10 vs. 32 | 1.300  | -10.58 to 13.18 | No | ns | >0.9999 |
| 10 vs. 35 | 2.329  | -13.40 to 18.05 | No | ns | >0.9999 |
| 10 vs. 36 | -6.314 | -32.15 to 19.52 | No | ns | >0.9999 |
| 10 vs. 37 | 2.016  | -18.86 to 22.89 | No | ns | >0.9999 |
| 10 vs. 40 | 3.210  | -12.83 to 19.25 | No | ns | >0.9999 |
| 10 vs. 41 | -3.694 | -20.93 to 13.54 | No | ns | >0.9999 |
| 10 vs. 42 | 5.553  | -13.82 to 24.93 | No | ns | 0.9992  |
| 10 vs. 45 | 3.292  | -13.71 to 20.29 | No | ns | >0.9999 |
| 10 vs. 46 | -2.921 | -25.79 to 19.95 | No | ns | >0.9999 |
| 10 vs. 47 | 6.056  | -4.978 to 17.09 | No | ns | 0.6984  |
| 10 vs. 50 | 5.172  | -9.770 to 20.11 | No | ns | 0.9913  |
| 10 vs. 51 | -5.525 | -29.60 to 18.55 | No | ns | >0.9999 |
| 10 vs. 52 | 7.020  | -3.897 to 17.94 | No | ns | 0.4666  |
| 10 vs. 55 | 6.875  | -3.191 to 16.94 | No | ns | 0.3791  |
| 10 vs. 60 | 8.415  | -14.18 to 31.01 | No | ns | 0.9810  |

|           |        |                 |    |    |         |
|-----------|--------|-----------------|----|----|---------|
| 11 vs. 12 | 13.80  | -16.93 to 44.54 | No | ns | 0.9053  |
| 11 vs. 15 | 14.52  | -10.57 to 39.61 | No | ns | 0.6241  |
| 11 vs. 16 | 1.072  | -11.62 to 13.76 | No | ns | >0.9999 |
| 11 vs. 17 | 15.93  | -7.531 to 39.40 | No | ns | 0.3873  |
| 11 vs. 20 | 16.83  | -8.589 to 42.25 | No | ns | 0.4237  |
| 11 vs. 21 | 0.9644 | -11.97 to 13.90 | No | ns | >0.9999 |
| 11 vs. 22 | 13.26  | -12.03 to 38.55 | No | ns | 0.7572  |
| 11 vs. 25 | 15.66  | -13.19 to 44.51 | No | ns | 0.7133  |
| 11 vs. 26 | 4.306  | -13.35 to 21.97 | No | ns | >0.9999 |
| 11 vs. 27 | 13.30  | -14.98 to 41.59 | No | ns | 0.8702  |
| 11 vs. 30 | 16.40  | -14.19 to 47.00 | No | ns | 0.7295  |
| 11 vs. 31 | 5.022  | -15.67 to 25.72 | No | ns | >0.9999 |
| 11 vs. 32 | 13.84  | -12.32 to 39.99 | No | ns | 0.7464  |
| 11 vs. 35 | 14.87  | -14.60 to 44.34 | No | ns | 0.8023  |
| 11 vs. 36 | 6.223  | -12.03 to 24.48 | No | ns | 0.9927  |
| 11 vs. 37 | 14.55  | -19.19 to 48.29 | No | ns | 0.9299  |
| 11 vs. 40 | 15.75  | -13.45 to 44.94 | No | ns | 0.7215  |
| 11 vs. 41 | 8.844  | -13.26 to 30.94 | No | ns | 0.9625  |
| 11 vs. 42 | 18.09  | -11.18 to 47.36 | No | ns | 0.5261  |
| 11 vs. 45 | 15.83  | -16.68 to 48.34 | No | ns | 0.8389  |
| 11 vs. 46 | 9.617  | -11.20 to 30.44 | No | ns | 0.8848  |
| 11 vs. 47 | 18.59  | -4.930 to 42.12 | No | ns | 0.2013  |
| 11 vs. 50 | 17.71  | -9.816 to 45.24 | No | ns | 0.4659  |
| 11 vs. 51 | 7.013  | -12.60 to 26.63 | No | ns | 0.9876  |
| 11 vs. 52 | 19.56  | -8.727 to 47.84 | No | ns | 0.3620  |
| 11 vs. 55 | 19.41  | -7.588 to 46.41 | No | ns | 0.3100  |
| 11 vs. 60 | 20.95  | -11.81 to 53.72 | No | ns | 0.4749  |
| 12 vs. 15 | 0.7152 | -11.65 to 13.08 | No | ns | >0.9999 |
| 12 vs. 16 | -12.73 | -39.23 to 13.77 | No | ns | 0.8516  |
| 12 vs. 17 | 2.132  | -11.53 to 15.80 | No | ns | >0.9999 |
| 12 vs. 20 | 3.026  | -11.11 to 17.16 | No | ns | >0.9999 |

|           |         |                 |    |    |         |
|-----------|---------|-----------------|----|----|---------|
| 12 vs. 21 | -12.84  | -42.60 to 16.92 | No | ns | 0.9299  |
| 12 vs. 22 | -0.5421 | -11.93 to 10.84 | No | ns | >0.9999 |
| 12 vs. 25 | 1.859   | -5.799 to 9.518 | No | ns | >0.9999 |
| 12 vs. 26 | -9.496  | -32.40 to 13.41 | No | ns | 0.9491  |
| 12 vs. 27 | -0.4990 | -10.44 to 9.442 | No | ns | >0.9999 |
| 12 vs. 30 | 2.599   | -9.193 to 14.39 | No | ns | >0.9999 |
| 12 vs. 31 | -8.780  | -35.08 to 17.52 | No | ns | 0.9943  |
| 12 vs. 32 | 0.03481 | -15.10 to 15.17 | No | ns | >0.9999 |
| 12 vs. 35 | 1.064   | -9.930 to 12.06 | No | ns | >0.9999 |
| 12 vs. 36 | -7.579  | -33.98 to 18.82 | No | ns | 0.9992  |
| 12 vs. 37 | 0.7512  | -12.84 to 14.35 | No | ns | >0.9999 |
| 12 vs. 40 | 1.945   | -12.65 to 16.54 | No | ns | >0.9999 |
| 12 vs. 41 | -4.959  | -20.20 to 10.28 | No | ns | 0.9958  |
| 12 vs. 42 | 4.288   | -6.511 to 15.09 | No | ns | 0.9650  |
| 12 vs. 45 | 2.027   | -12.55 to 16.60 | No | ns | >0.9999 |
| 12 vs. 46 | -4.186  | -29.15 to 20.78 | No | ns | >0.9999 |
| 12 vs. 47 | 4.791   | -10.69 to 20.27 | No | ns | 0.9978  |
| 12 vs. 50 | 3.907   | -6.245 to 14.06 | No | ns | 0.9738  |
| 12 vs. 51 | -6.790  | -36.87 to 23.29 | No | ns | >0.9999 |
| 12 vs. 52 | 5.755   | -5.340 to 16.85 | No | ns | 0.7704  |
| 12 vs. 55 | 5.610   | -10.03 to 21.25 | No | ns | 0.9871  |
| 12 vs. 60 | 7.151   | -5.167 to 19.47 | No | ns | 0.6194  |
| 15 vs. 16 | -13.45  | -37.11 to 10.21 | No | ns | 0.6501  |
| 15 vs. 17 | 1.417   | -5.632 to 8.467 | No | ns | >0.9999 |
| 15 vs. 20 | 2.311   | -6.350 to 10.97 | No | ns | 0.9997  |
| 15 vs. 21 | -13.55  | -36.03 to 8.927 | No | ns | 0.5634  |
| 15 vs. 22 | -1.257  | -12.77 to 10.26 | No | ns | >0.9999 |
| 15 vs. 25 | 1.144   | -11.77 to 14.06 | No | ns | >0.9999 |
| 15 vs. 26 | -10.21  | -27.94 to 7.516 | No | ns | 0.6307  |
| 15 vs. 27 | -1.214  | -15.49 to 13.07 | No | ns | >0.9999 |
| 15 vs. 30 | 1.884   | -9.965 to 13.73 | No | ns | >0.9999 |

|           |         |                 |    |    |         |
|-----------|---------|-----------------|----|----|---------|
| 15 vs. 31 | -9.495  | -29.20 to 10.21 | No | ns | 0.8488  |
| 15 vs. 32 | -0.6803 | -13.19 to 11.83 | No | ns | >0.9999 |
| 15 vs. 35 | 0.3488  | -9.743 to 10.44 | No | ns | >0.9999 |
| 15 vs. 36 | -8.294  | -27.63 to 11.05 | No | ns | 0.9330  |
| 15 vs. 37 | 0.03600 | -15.77 to 15.84 | No | ns | >0.9999 |
| 15 vs. 40 | 1.230   | -10.46 to 12.92 | No | ns | >0.9999 |
| 15 vs. 41 | -5.674  | -18.72 to 7.369 | No | ns | 0.9252  |
| 15 vs. 42 | 3.573   | -10.66 to 17.81 | No | ns | >0.9999 |
| 15 vs. 45 | 1.312   | -10.79 to 13.41 | No | ns | >0.9999 |
| 15 vs. 46 | -4.901  | -23.30 to 13.50 | No | ns | 0.9997  |
| 15 vs. 47 | 4.076   | -4.739 to 12.89 | No | ns | 0.8841  |
| 15 vs. 50 | 3.192   | -6.318 to 12.70 | No | ns | 0.9939  |
| 15 vs. 51 | -7.505  | -28.35 to 13.35 | No | ns | 0.9866  |
| 15 vs. 52 | 5.040   | -2.905 to 12.99 | No | ns | 0.4869  |
| 15 vs. 55 | 4.895   | -4.066 to 13.86 | No | ns | 0.7049  |
| 15 vs. 60 | 6.435   | -10.62 to 23.49 | No | ns | 0.9784  |
| 16 vs. 17 | 14.86   | -8.464 to 38.19 | No | ns | 0.4804  |
| 16 vs. 20 | 15.76   | -6.701 to 38.21 | No | ns | 0.3421  |
| 16 vs. 21 | -0.1074 | -13.93 to 13.71 | No | ns | >0.9999 |
| 16 vs. 22 | 12.19   | -9.931 to 34.31 | No | ns | 0.6931  |
| 16 vs. 25 | 14.59   | -9.532 to 38.71 | No | ns | 0.5586  |
| 16 vs. 26 | 3.235   | -13.49 to 19.96 | No | ns | >0.9999 |
| 16 vs. 27 | 12.23   | -11.34 to 35.81 | No | ns | 0.7702  |
| 16 vs. 30 | 15.33   | -13.56 to 44.22 | No | ns | 0.7428  |
| 16 vs. 31 | 3.950   | -18.38 to 26.28 | No | ns | >0.9999 |
| 16 vs. 32 | 12.77   | -8.823 to 34.35 | No | ns | 0.5923  |
| 16 vs. 35 | 13.79   | -11.69 to 39.28 | No | ns | 0.7170  |
| 16 vs. 36 | 5.151   | -14.71 to 25.01 | No | ns | 0.9998  |
| 16 vs. 37 | 13.48   | -18.28 to 45.25 | No | ns | 0.9383  |
| 16 vs. 40 | 14.68   | -13.22 to 42.57 | No | ns | 0.7533  |
| 16 vs. 41 | 7.772   | -10.24 to 25.78 | No | ns | 0.9297  |

|           |         |                 |    |    |         |
|-----------|---------|-----------------|----|----|---------|
| 16 vs. 42 | 17.02   | -9.616 to 43.65 | No | ns | 0.4761  |
| 16 vs. 45 | 14.76   | -14.98 to 44.50 | No | ns | 0.8198  |
| 16 vs. 46 | 8.545   | -10.31 to 27.40 | No | ns | 0.8990  |
| 16 vs. 47 | 17.52   | -4.851 to 39.89 | No | ns | 0.2107  |
| 16 vs. 50 | 16.64   | -8.951 to 42.23 | No | ns | 0.4502  |
| 16 vs. 51 | 5.941   | -15.16 to 27.04 | No | ns | 0.9994  |
| 16 vs. 52 | 18.49   | -8.593 to 45.56 | No | ns | 0.3798  |
| 16 vs. 55 | 18.34   | -6.972 to 43.65 | No | ns | 0.3001  |
| 16 vs. 60 | 19.88   | -9.048 to 48.81 | No | ns | 0.3705  |
| 17 vs. 20 | 0.8937  | -8.502 to 10.29 | No | ns | >0.9999 |
| 17 vs. 21 | -14.97  | -39.19 to 9.253 | No | ns | 0.5262  |
| 17 vs. 22 | -2.674  | -14.06 to 8.715 | No | ns | >0.9999 |
| 17 vs. 25 | -0.2729 | -13.39 to 12.84 | No | ns | >0.9999 |
| 17 vs. 26 | -11.63  | -32.21 to 8.951 | No | ns | 0.6582  |
| 17 vs. 27 | -2.631  | -16.85 to 11.59 | No | ns | >0.9999 |
| 17 vs. 30 | 0.4671  | -12.02 to 12.96 | No | ns | >0.9999 |
| 17 vs. 31 | -10.91  | -31.51 to 9.689 | No | ns | 0.7448  |
| 17 vs. 32 | -2.097  | -13.84 to 9.648 | No | ns | >0.9999 |
| 17 vs. 35 | -1.068  | -14.20 to 12.07 | No | ns | >0.9999 |
| 17 vs. 36 | -9.712  | -31.60 to 12.17 | No | ns | 0.9132  |
| 17 vs. 37 | -1.381  | -18.40 to 15.64 | No | ns | >0.9999 |
| 17 vs. 40 | -0.1874 | -12.53 to 12.15 | No | ns | >0.9999 |
| 17 vs. 41 | -7.091  | -22.48 to 8.303 | No | ns | 0.8870  |
| 17 vs. 42 | 2.156   | -11.97 to 16.28 | No | ns | >0.9999 |
| 17 vs. 45 | -0.1056 | -12.75 to 12.54 | No | ns | >0.9999 |
| 17 vs. 46 | -6.318  | -27.14 to 14.50 | No | ns | 0.9983  |
| 17 vs. 47 | 2.659   | -4.063 to 9.381 | No | ns | 0.9662  |
| 17 vs. 50 | 1.775   | -8.434 to 11.98 | No | ns | >0.9999 |
| 17 vs. 51 | -8.922  | -31.89 to 14.05 | No | ns | 0.9714  |
| 17 vs. 52 | 3.623   | -4.314 to 11.56 | No | ns | 0.8938  |
| 17 vs. 55 | 3.478   | -5.686 to 12.64 | No | ns | 0.9771  |

|           |         |                 |    |    |         |
|-----------|---------|-----------------|----|----|---------|
| 17 vs. 60 | 5.018   | -12.17 to 22.20 | No | ns | 0.9990  |
| 20 vs. 21 | -15.86  | -39.90 to 8.174 | No | ns | 0.4283  |
| 20 vs. 22 | -3.568  | -13.72 to 6.587 | No | ns | 0.9897  |
| 20 vs. 25 | -1.167  | -15.08 to 12.74 | No | ns | >0.9999 |
| 20 vs. 26 | -12.52  | -34.47 to 9.429 | No | ns | 0.6447  |
| 20 vs. 27 | -3.525  | -18.48 to 11.43 | No | ns | >0.9999 |
| 20 vs. 30 | -0.4265 | -14.75 to 13.90 | No | ns | >0.9999 |
| 20 vs. 31 | -11.81  | -37.19 to 13.58 | No | ns | 0.8795  |
| 20 vs. 32 | -2.991  | -15.72 to 9.734 | No | ns | >0.9999 |
| 20 vs. 35 | -1.962  | -13.17 to 9.250 | No | ns | >0.9999 |
| 20 vs. 36 | -10.61  | -34.48 to 13.27 | No | ns | 0.9124  |
| 20 vs. 37 | -2.275  | -21.71 to 17.16 | No | ns | >0.9999 |
| 20 vs. 40 | -1.081  | -16.60 to 14.43 | No | ns | >0.9999 |
| 20 vs. 41 | -7.985  | -25.66 to 9.695 | No | ns | 0.9014  |
| 20 vs. 42 | 1.262   | -14.47 to 17.00 | No | ns | >0.9999 |
| 20 vs. 45 | -0.9993 | -15.30 to 13.30 | No | ns | >0.9999 |
| 20 vs. 46 | -7.212  | -29.33 to 14.90 | No | ns | 0.9957  |
| 20 vs. 47 | 1.765   | -9.190 to 12.72 | No | ns | >0.9999 |
| 20 vs. 50 | 0.8815  | -11.14 to 12.90 | No | ns | >0.9999 |
| 20 vs. 51 | -9.816  | -33.71 to 14.07 | No | ns | 0.9528  |
| 20 vs. 52 | 2.729   | -6.417 to 11.88 | No | ns | 0.9986  |
| 20 vs. 55 | 2.584   | -7.054 to 12.22 | No | ns | 0.9997  |
| 20 vs. 60 | 4.125   | -13.53 to 21.78 | No | ns | >0.9999 |
| 21 vs. 22 | 12.30   | -13.19 to 37.78 | No | ns | 0.8474  |
| 21 vs. 25 | 14.70   | -13.48 to 42.87 | No | ns | 0.7636  |
| 21 vs. 26 | 3.342   | -8.427 to 15.11 | No | ns | 0.9993  |
| 21 vs. 27 | 12.34   | -15.13 to 39.81 | No | ns | 0.9053  |
| 21 vs. 30 | 15.44   | -14.38 to 45.25 | No | ns | 0.7725  |
| 21 vs. 31 | 4.058   | -13.26 to 21.38 | No | ns | >0.9999 |
| 21 vs. 32 | 12.87   | -11.74 to 37.48 | No | ns | 0.7604  |
| 21 vs. 35 | 13.90   | -13.09 to 40.90 | No | ns | 0.7789  |

|           |         |                 |    |    |         |
|-----------|---------|-----------------|----|----|---------|
| 21 vs. 36 | 5.259   | -6.593 to 17.11 | No | ns | 0.9132  |
| 21 vs. 37 | 13.59   | -19.37 to 46.55 | No | ns | 0.9513  |
| 21 vs. 40 | 14.78   | -13.51 to 43.08 | No | ns | 0.7619  |
| 21 vs. 41 | 7.879   | -10.36 to 26.12 | No | ns | 0.9291  |
| 21 vs. 42 | 17.13   | -12.37 to 46.62 | No | ns | 0.6189  |
| 21 vs. 45 | 14.86   | -16.19 to 45.91 | No | ns | 0.8547  |
| 21 vs. 46 | 8.652   | -5.338 to 22.64 | No | ns | 0.5252  |
| 21 vs. 47 | 17.63   | -6.090 to 41.35 | No | ns | 0.2688  |
| 21 vs. 50 | 16.75   | -10.12 to 43.61 | No | ns | 0.5131  |
| 21 vs. 51 | 6.048   | -7.605 to 19.70 | No | ns | 0.9143  |
| 21 vs. 52 | 18.59   | -9.256 to 46.44 | No | ns | 0.4115  |
| 21 vs. 55 | 18.45   | -6.425 to 43.32 | No | ns | 0.2713  |
| 21 vs. 60 | 19.99   | -12.76 to 52.74 | No | ns | 0.5450  |
| 22 vs. 25 | 2.401   | -7.189 to 11.99 | No | ns | >0.9999 |
| 22 vs. 26 | -8.954  | -28.97 to 11.06 | No | ns | 0.9078  |
| 22 vs. 27 | 0.04309 | -11.56 to 11.64 | No | ns | >0.9999 |
| 22 vs. 30 | 3.142   | -12.01 to 18.29 | No | ns | >0.9999 |
| 22 vs. 31 | -8.238  | -33.97 to 17.49 | No | ns | 0.9966  |
| 22 vs. 32 | 0.5769  | -12.30 to 13.46 | No | ns | >0.9999 |
| 22 vs. 35 | 1.606   | -9.297 to 12.51 | No | ns | >0.9999 |
| 22 vs. 36 | -7.037  | -31.67 to 17.60 | No | ns | 0.9993  |
| 22 vs. 37 | 1.293   | -14.37 to 16.96 | No | ns | >0.9999 |
| 22 vs. 40 | 2.487   | -11.83 to 16.81 | No | ns | >0.9999 |
| 22 vs. 41 | -4.417  | -20.57 to 11.74 | No | ns | 0.9996  |
| 22 vs. 42 | 4.830   | -8.569 to 18.23 | No | ns | 0.9864  |
| 22 vs. 45 | 2.569   | -12.78 to 17.92 | No | ns | >0.9999 |
| 22 vs. 46 | -3.643  | -26.63 to 19.35 | No | ns | >0.9999 |
| 22 vs. 47 | 5.333   | -7.214 to 17.88 | No | ns | 0.9375  |
| 22 vs. 50 | 4.450   | -8.525 to 17.42 | No | ns | 0.9922  |
| 22 vs. 51 | -6.247  | -31.21 to 18.72 | No | ns | >0.9999 |
| 22 vs. 52 | 6.298   | -2.305 to 14.90 | No | ns | 0.2873  |



|           |         |                 |    |    |         |
|-----------|---------|-----------------|----|----|---------|
| 22 vs. 55 | 6.152   | -8.319 to 20.62 | No | ns | 0.9375  |
| 22 vs. 60 | 7.693   | -10.32 to 25.71 | No | ns | 0.9353  |
| 25 vs. 26 | -11.36  | -32.60 to 9.885 | No | ns | 0.7331  |
| 25 vs. 27 | -2.358  | -7.124 to 2.407 | No | ns | 0.8225  |
| 25 vs. 30 | 0.7401  | -10.73 to 12.21 | No | ns | >0.9999 |
| 25 vs. 31 | -10.64  | -35.94 to 14.66 | No | ns | 0.9427  |
| 25 vs. 32 | -1.825  | -13.69 to 10.04 | No | ns | >0.9999 |
| 25 vs. 35 | -0.7954 | -10.03 to 8.443 | No | ns | >0.9999 |
| 25 vs. 36 | -9.439  | -34.71 to 15.83 | No | ns | 0.9804  |
| 25 vs. 37 | -1.108  | -13.12 to 10.91 | No | ns | >0.9999 |
| 25 vs. 40 | 0.08557 | -11.95 to 12.12 | No | ns | >0.9999 |
| 25 vs. 41 | -6.818  | -20.87 to 7.233 | No | ns | 0.8421  |
| 25 vs. 42 | 2.429   | -5.824 to 10.68 | No | ns | 0.9989  |
| 25 vs. 45 | 0.1673  | -11.43 to 11.77 | No | ns | >0.9999 |
| 25 vs. 46 | -6.045  | -29.54 to 17.45 | No | ns | 0.9999  |
| 25 vs. 47 | 2.932   | -11.74 to 17.60 | No | ns | >0.9999 |
| 25 vs. 50 | 2.048   | -8.391 to 12.49 | No | ns | >0.9999 |
| 25 vs. 51 | -8.649  | -36.99 to 19.69 | No | ns | 0.9982  |
| 25 vs. 52 | 3.896   | -6.885 to 14.68 | No | ns | 0.9861  |
| 25 vs. 55 | 3.751   | -11.58 to 19.08 | No | ns | >0.9999 |
| 25 vs. 60 | 5.291   | -6.657 to 17.24 | No | ns | 0.9145  |
| 26 vs. 27 | 8.997   | -11.95 to 29.94 | No | ns | 0.9321  |
| 26 vs. 30 | 12.10   | -11.54 to 35.73 | No | ns | 0.7863  |
| 26 vs. 31 | 0.7159  | -13.42 to 14.85 | No | ns | >0.9999 |
| 26 vs. 32 | 9.531   | -11.12 to 30.19 | No | ns | 0.8857  |
| 26 vs. 35 | 10.56   | -10.13 to 31.25 | No | ns | 0.7890  |
| 26 vs. 36 | 1.917   | -7.360 to 11.19 | No | ns | >0.9999 |
| 26 vs. 37 | 10.25   | -14.23 to 34.72 | No | ns | 0.9447  |
| 26 vs. 40 | 11.44   | -9.931 to 32.81 | No | ns | 0.7314  |
| 26 vs. 41 | 4.537   | -6.419 to 15.49 | No | ns | 0.9495  |
| 26 vs. 42 | 13.78   | -8.949 to 36.52 | No | ns | 0.5548  |

|           |         |                 |    |    |         |
|-----------|---------|-----------------|----|----|---------|
| 26 vs. 45 | 11.52   | -13.64 to 36.68 | No | ns | 0.8913  |
| 26 vs. 46 | 5.310   | -6.145 to 16.77 | No | ns | 0.8821  |
| 26 vs. 47 | 14.29   | -6.286 to 34.86 | No | ns | 0.3561  |
| 26 vs. 50 | 13.40   | -7.881 to 34.69 | No | ns | 0.4980  |
| 26 vs. 51 | 2.706   | -11.17 to 16.58 | No | ns | >0.9999 |
| 26 vs. 52 | 15.25   | -7.265 to 37.77 | No | ns | 0.3909  |
| 26 vs. 55 | 15.11   | -6.792 to 37.00 | No | ns | 0.3653  |
| 26 vs. 60 | 16.65   | -10.49 to 43.78 | No | ns | 0.5375  |
| 27 vs. 30 | 3.098   | -7.919 to 14.12 | No | ns | 0.9994  |
| 27 vs. 31 | -8.281  | -33.36 to 16.80 | No | ns | 0.9950  |
| 27 vs. 32 | 0.5338  | -12.32 to 13.38 | No | ns | >0.9999 |
| 27 vs. 35 | 1.563   | -8.232 to 11.36 | No | ns | >0.9999 |
| 27 vs. 36 | -7.080  | -31.74 to 17.58 | No | ns | 0.9992  |
| 27 vs. 37 | 1.250   | -13.56 to 16.06 | No | ns | >0.9999 |
| 27 vs. 40 | 2.444   | -9.357 to 14.25 | No | ns | >0.9999 |
| 27 vs. 41 | -4.460  | -18.33 to 9.407 | No | ns | 0.9964  |
| 27 vs. 42 | 4.787   | -3.253 to 12.83 | No | ns | 0.5820  |
| 27 vs. 45 | 2.526   | -10.59 to 15.64 | No | ns | >0.9999 |
| 27 vs. 46 | -3.687  | -27.10 to 19.73 | No | ns | >0.9999 |
| 27 vs. 47 | 5.290   | -11.65 to 22.23 | No | ns | 0.9975  |
| 27 vs. 50 | 4.406   | -6.823 to 15.64 | No | ns | 0.9686  |
| 27 vs. 51 | -6.291  | -34.39 to 21.81 | No | ns | >0.9999 |
| 27 vs. 52 | 6.254   | -6.528 to 19.04 | No | ns | 0.8341  |
| 27 vs. 55 | 6.109   | -9.056 to 21.27 | No | ns | 0.9602  |
| 27 vs. 60 | 7.650   | -5.781 to 21.08 | No | ns | 0.6469  |
| 30 vs. 31 | -11.38  | -36.99 to 14.23 | No | ns | 0.9123  |
| 30 vs. 32 | -2.565  | -19.53 to 14.40 | No | ns | >0.9999 |
| 30 vs. 35 | -1.535  | -10.72 to 7.647 | No | ns | >0.9999 |
| 30 vs. 36 | -10.18  | -35.30 to 14.94 | No | ns | 0.9581  |
| 30 vs. 37 | -1.848  | -15.46 to 11.77 | No | ns | >0.9999 |
| 30 vs. 40 | -0.6545 | -8.113 to 6.804 | No | ns | >0.9999 |

|           |         |                 |    |    |         |
|-----------|---------|-----------------|----|----|---------|
| 30 vs. 41 | -7.558  | -25.44 to 10.32 | No | ns | 0.9403  |
| 30 vs. 42 | 1.688   | -5.698 to 9.075 | No | ns | >0.9999 |
| 30 vs. 45 | -0.5728 | -10.57 to 9.428 | No | ns | >0.9999 |
| 30 vs. 46 | -6.785  | -32.56 to 18.99 | No | ns | 0.9998  |
| 30 vs. 47 | 2.192   | -14.71 to 19.10 | No | ns | >0.9999 |
| 30 vs. 50 | 1.308   | -5.723 to 8.339 | No | ns | >0.9999 |
| 30 vs. 51 | -9.389  | -37.98 to 19.20 | No | ns | 0.9953  |
| 30 vs. 52 | 3.156   | -7.169 to 13.48 | No | ns | 0.9981  |
| 30 vs. 55 | 3.011   | -10.03 to 16.05 | No | ns | >0.9999 |
| 30 vs. 60 | 4.551   | -7.384 to 16.49 | No | ns | 0.9760  |
| 31 vs. 32 | 8.815   | -11.53 to 29.16 | No | ns | 0.9275  |
| 31 vs. 35 | 9.844   | -16.06 to 35.75 | No | ns | 0.9768  |
| 31 vs. 36 | 1.201   | -13.30 to 15.70 | No | ns | >0.9999 |
| 31 vs. 37 | 9.531   | -19.12 to 38.18 | No | ns | 0.9945  |
| 31 vs. 40 | 10.72   | -12.42 to 33.87 | No | ns | 0.8822  |
| 31 vs. 41 | 3.821   | -10.49 to 18.13 | No | ns | 0.9997  |
| 31 vs. 42 | 13.07   | -14.03 to 40.16 | No | ns | 0.8478  |
| 31 vs. 45 | 10.81   | -15.69 to 37.31 | No | ns | 0.9557  |
| 31 vs. 46 | 4.594   | -8.857 to 18.05 | No | ns | 0.9925  |
| 31 vs. 47 | 13.57   | -7.352 to 34.49 | No | ns | 0.4538  |
| 31 vs. 50 | 12.69   | -10.55 to 35.92 | No | ns | 0.7054  |
| 31 vs. 51 | 1.990   | -13.76 to 17.74 | No | ns | >0.9999 |
| 31 vs. 52 | 14.54   | -10.94 to 40.01 | No | ns | 0.6445  |
| 31 vs. 55 | 14.39   | -6.641 to 35.42 | No | ns | 0.3766  |
| 31 vs. 60 | 15.93   | -14.35 to 46.21 | No | ns | 0.7531  |
| 32 vs. 35 | 1.029   | -13.61 to 15.66 | No | ns | >0.9999 |
| 32 vs. 36 | -7.614  | -31.67 to 16.44 | No | ns | 0.9970  |
| 32 vs. 37 | 0.7163  | -19.17 to 20.60 | No | ns | >0.9999 |
| 32 vs. 40 | 1.910   | -13.54 to 17.36 | No | ns | >0.9999 |
| 32 vs. 41 | -4.993  | -18.66 to 8.673 | No | ns | 0.9844  |
| 32 vs. 42 | 4.253   | -13.38 to 21.88 | No | ns | >0.9999 |

|           |         |                 |    |    |         |
|-----------|---------|-----------------|----|----|---------|
| 32 vs. 45 | 1.992   | -12.27 to 16.25 | No | ns | >0.9999 |
| 32 vs. 46 | -4.220  | -23.23 to 14.79 | No | ns | >0.9999 |
| 32 vs. 47 | 4.757   | -7.301 to 16.81 | No | ns | 0.9670  |
| 32 vs. 50 | 3.873   | -10.59 to 18.34 | No | ns | 0.9997  |
| 32 vs. 51 | -6.824  | -29.74 to 16.09 | No | ns | 0.9987  |
| 32 vs. 52 | 5.721   | -8.174 to 19.62 | No | ns | 0.9520  |
| 32 vs. 55 | 5.575   | -4.798 to 15.95 | No | ns | 0.7263  |
| 32 vs. 60 | 7.116   | -13.04 to 27.27 | No | ns | 0.9891  |
| 35 vs. 36 | -8.643  | -31.99 to 14.70 | No | ns | 0.9821  |
| 35 vs. 37 | -0.3128 | -13.86 to 13.24 | No | ns | >0.9999 |
| 35 vs. 40 | 0.8810  | -8.294 to 10.06 | No | ns | >0.9999 |
| 35 vs. 41 | -6.023  | -21.37 to 9.328 | No | ns | 0.9686  |
| 35 vs. 42 | 3.224   | -6.232 to 12.68 | No | ns | 0.9927  |
| 35 vs. 45 | 0.9627  | -8.378 to 10.30 | No | ns | >0.9999 |
| 35 vs. 46 | -5.250  | -27.91 to 17.41 | No | ns | >0.9999 |
| 35 vs. 47 | 3.727   | -11.23 to 18.69 | No | ns | >0.9999 |
| 35 vs. 50 | 2.843   | -6.792 to 12.48 | No | ns | 0.9988  |
| 35 vs. 51 | -7.854  | -33.10 to 17.39 | No | ns | 0.9976  |
| 35 vs. 52 | 4.691   | -5.297 to 14.68 | No | ns | 0.8714  |
| 35 vs. 55 | 4.546   | -8.728 to 17.82 | No | ns | 0.9923  |
| 35 vs. 60 | 6.087   | -7.833 to 20.01 | No | ns | 0.9222  |
| 36 vs. 37 | 8.330   | -18.76 to 35.42 | No | ns | 0.9980  |
| 36 vs. 40 | 9.524   | -14.33 to 33.38 | No | ns | 0.9632  |
| 36 vs. 41 | 2.621   | -11.46 to 16.71 | No | ns | >0.9999 |
| 36 vs. 42 | 11.87   | -13.12 to 36.85 | No | ns | 0.8618  |
| 36 vs. 45 | 9.606   | -16.83 to 36.04 | No | ns | 0.9852  |
| 36 vs. 46 | 3.394   | -6.606 to 13.39 | No | ns | 0.9930  |
| 36 vs. 47 | 12.37   | -9.311 to 34.05 | No | ns | 0.6444  |
| 36 vs. 50 | 11.49   | -11.03 to 34.00 | No | ns | 0.7898  |
| 36 vs. 51 | 0.7897  | -13.16 to 14.74 | No | ns | >0.9999 |
| 36 vs. 52 | 13.33   | -11.84 to 38.51 | No | ns | 0.7450  |

|           |         |                 |    |    |         |
|-----------|---------|-----------------|----|----|---------|
| 36 vs. 55 | 13.19   | -9.951 to 36.33 | No | ns | 0.6459  |
| 36 vs. 60 | 14.73   | -13.79 to 43.25 | No | ns | 0.7755  |
| 37 vs. 40 | 1.194   | -13.13 to 15.52 | No | ns | >0.9999 |
| 37 vs. 41 | -5.710  | -25.56 to 14.14 | No | ns | 0.9992  |
| 37 vs. 42 | 3.537   | -8.086 to 15.16 | No | ns | 0.9982  |
| 37 vs. 45 | 1.276   | -11.16 to 13.71 | No | ns | >0.9999 |
| 37 vs. 46 | -4.937  | -31.69 to 21.82 | No | ns | >0.9999 |
| 37 vs. 47 | 4.040   | -14.15 to 22.23 | No | ns | >0.9999 |
| 37 vs. 50 | 3.156   | -11.15 to 17.46 | No | ns | >0.9999 |
| 37 vs. 51 | -7.541  | -38.86 to 23.77 | No | ns | >0.9999 |
| 37 vs. 52 | 5.004   | -7.647 to 17.66 | No | ns | 0.9662  |
| 37 vs. 55 | 4.859   | -15.86 to 25.57 | No | ns | >0.9999 |
| 37 vs. 60 | 6.399   | -7.442 to 20.24 | No | ns | 0.8841  |
| 40 vs. 41 | -6.904  | -23.66 to 9.852 | No | ns | 0.9517  |
| 40 vs. 42 | 2.343   | -7.944 to 12.63 | No | ns | >0.9999 |
| 40 vs. 45 | 0.08171 | -9.223 to 9.387 | No | ns | >0.9999 |
| 40 vs. 46 | -6.131  | -30.30 to 18.04 | No | ns | 0.9999  |
| 40 vs. 47 | 2.846   | -13.09 to 18.78 | No | ns | >0.9999 |
| 40 vs. 50 | 1.962   | -8.221 to 12.15 | No | ns | >0.9999 |
| 40 vs. 51 | -8.735  | -33.70 to 16.23 | No | ns | 0.9902  |
| 40 vs. 52 | 3.810   | -7.267 to 14.89 | No | ns | 0.9919  |
| 40 vs. 55 | 3.665   | -9.537 to 16.87 | No | ns | 0.9995  |
| 40 vs. 60 | 5.206   | -11.32 to 21.73 | No | ns | 0.9972  |
| 41 vs. 42 | 9.247   | -7.787 to 26.28 | No | ns | 0.7132  |
| 41 vs. 45 | 6.985   | -11.72 to 25.69 | No | ns | 0.9804  |
| 41 vs. 46 | 0.7731  | -11.07 to 12.62 | No | ns | >0.9999 |
| 41 vs. 47 | 9.750   | -5.586 to 25.09 | No | ns | 0.4837  |
| 41 vs. 50 | 8.866   | -5.955 to 23.69 | No | ns | 0.5750  |
| 41 vs. 51 | -1.831  | -20.75 to 17.09 | No | ns | >0.9999 |
| 41 vs. 52 | 10.71   | -7.233 to 28.66 | No | ns | 0.5781  |
| 41 vs. 55 | 10.57   | -5.696 to 26.83 | No | ns | 0.4512  |

|           |         |                 |    |    |         |
|-----------|---------|-----------------|----|----|---------|
| 41 vs. 60 | 12.11   | -8.314 to 32.53 | No | ns | 0.5883  |
| 42 vs. 45 | -2.261  | -13.89 to 9.363 | No | ns | >0.9999 |
| 42 vs. 46 | -8.473  | -34.48 to 17.54 | No | ns | 0.9957  |
| 42 vs. 47 | 0.5035  | -16.55 to 17.55 | No | ns | >0.9999 |
| 42 vs. 50 | -0.3804 | -8.836 to 8.076 | No | ns | >0.9999 |
| 42 vs. 51 | -11.08  | -41.05 to 18.89 | No | ns | 0.9824  |
| 42 vs. 52 | 1.468   | -10.23 to 13.16 | No | ns | >0.9999 |
| 42 vs. 55 | 1.322   | -15.90 to 18.54 | No | ns | >0.9999 |
| 42 vs. 60 | 2.863   | -6.128 to 11.85 | No | ns | 0.9968  |
| 45 vs. 46 | -6.212  | -31.10 to 18.68 | No | ns | >0.9999 |
| 45 vs. 47 | 2.765   | -11.15 to 16.68 | No | ns | >0.9999 |
| 45 vs. 50 | 1.881   | -8.914 to 12.68 | No | ns | >0.9999 |
| 45 vs. 51 | -8.816  | -36.80 to 19.17 | No | ns | 0.9972  |
| 45 vs. 52 | 3.729   | -7.212 to 14.67 | No | ns | 0.9927  |
| 45 vs. 55 | 3.583   | -10.14 to 17.31 | No | ns | 0.9998  |
| 45 vs. 60 | 5.124   | -8.525 to 18.77 | No | ns | 0.9794  |
| 46 vs. 47 | 8.977   | -10.65 to 28.61 | No | ns | 0.8924  |
| 46 vs. 50 | 8.093   | -14.60 to 30.79 | No | ns | 0.9879  |
| 46 vs. 51 | -2.604  | -15.07 to 9.861 | No | ns | >0.9999 |
| 46 vs. 52 | 9.941   | -14.47 to 34.35 | No | ns | 0.9563  |
| 46 vs. 55 | 9.796   | -10.58 to 30.17 | No | ns | 0.8508  |
| 46 vs. 60 | 11.34   | -17.60 to 40.27 | No | ns | 0.9690  |
| 47 vs. 50 | -0.8839 | -13.71 to 11.94 | No | ns | >0.9999 |
| 47 vs. 51 | -11.58  | -34.08 to 10.92 | No | ns | 0.7797  |
| 47 vs. 52 | 0.9640  | -10.33 to 12.26 | No | ns | >0.9999 |
| 47 vs. 55 | 0.8186  | -12.13 to 13.77 | No | ns | >0.9999 |
| 47 vs. 60 | 2.359   | -16.09 to 20.81 | No | ns | >0.9999 |
| 50 vs. 51 | -10.70  | -37.20 to 15.80 | No | ns | 0.9595  |
| 50 vs. 52 | 1.848   | -7.781 to 11.48 | No | ns | >0.9999 |
| 50 vs. 55 | 1.703   | -10.20 to 13.60 | No | ns | >0.9999 |
| 50 vs. 60 | 3.243   | -8.225 to 14.71 | No | ns | 0.9994  |

|           |         |                 |    |    |         |
|-----------|---------|-----------------|----|----|---------|
| 51 vs. 52 | 12.55   | -13.96 to 39.05 | No | ns | 0.8648  |
| 51 vs. 55 | 12.40   | -9.739 to 34.54 | No | ns | 0.6706  |
| 51 vs. 60 | 13.94   | -20.53 to 48.41 | No | ns | 0.9588  |
| 52 vs. 55 | -0.1454 | -11.47 to 11.18 | No | ns | >0.9999 |
| 52 vs. 60 | 1.395   | -13.97 to 16.76 | No | ns | >0.9999 |
| 55 vs. 60 | 1.541   | -19.00 to 22.08 | No | ns | >0.9999 |
